# Supplementary material for: Nutrient Dynamics and Ecosystem Metabolism of Megacity Rivers: Influence of Elevated Nutrient Concentrations in Beijing’s Waterways
Source: MDPI journal article supplement (doi:10.3390/w14192963), 2022-09-21
Supplement: s1 [file s1]

## Supplementary Materials

### Nutrient Dynamics and Ecosystem Metabolism of Megacity Rivers: Influence of Elevated Nutrient Concentrations in Beijing's Waterways

Meng Zhang<sup>1</sup> (0000-0002-6218-4074); Robert A Francis<sup>1</sup> (0000-0002-4598-0861) and Michael A Chadwick <sup>1\*</sup> (0000-0003-4891-4357)

<sup>1</sup> Department of Geography, King's College London 40 Bush House (Northeast Wing, Aldwych, London WC2B 4BG

MZ: meng.zhang@kcl.ac.uk; RAF: robert.francis@kcl.ac.uk; MAC: michael.chadwick@kcl.ac.uk

### Supplementary Tables

Table S1. Water quality parameter for each sampling site. The number in the parentheses represents the standard deviation.

Sep 6

| River | NO <sub>3</sub> <sup>-</sup> | NH <sub>4</sub> <sup>+</sup> | PO <sub>4</sub> <sup>3-</sup> | DOC   | temp | DO    | pH   |
|-------|------------------------------|------------------------------|-------------------------------|-------|------|-------|------|
| L1    | 29.30<br>(0.11)              | 1.76<br>(0.06)               | 1.33                          | 10.02 | 28.6 | 6.26  | 7.75 |
| L2    | 33.31<br>(0.10)              | 1.34<br>(0.06)               | 0.98                          | 8.68  | 29.3 | 6.76  | 7.92 |
| T1    | 30.18<br>(0.08)              | 1.15<br>(0.04)               | 0.56                          | 9.84  | 30.6 | 9.78  | 7.53 |
| T2    | 38.55<br>(0.08)              | 0.96<br>(0.04)               | 0.84                          | 9.37  | 32.8 | 11.12 | 8.42 |
| W1    | 20.76<br>(0.06)              | 1.05<br>(0.03)               | 1.17                          | 7.52  | 33.1 | 10.82 | 8.26 |
| W2    | 22.03<br>(0.04)              | 1.19<br>(0.05)               | 1.26                          | 8.47  | 33.6 | 10.62 | 8.32 |

Sep 13

| River | NO <sub>3</sub> <sup>-</sup> | NH <sub>4</sub> <sup>+</sup> | PO <sub>4</sub> <sup>3-</sup> | DOC   | temp | DO    | pH   |
|-------|------------------------------|------------------------------|-------------------------------|-------|------|-------|------|
| L1    | 32.16<br>(0.07)              | 1.40 (0.04)                  | 1.14                          | 10.34 | 25.3 | 6.80  | 7.86 |
| L2    | 36.22<br>(0.08)              | 1.13<br>(0.06)               | 0.73                          | 9.47  | 27.5 | 7.07  | 8.09 |
| T1    | 31.46<br>(0.10)              | 1.03<br>(0.06)               | 0.36                          | 10.82 | 26.5 | 10.65 | 7.67 |
| T2    | 39.12<br>(0.12)              | 0.84<br>(0.05)               | 0.61                          | 9.60  | 26.8 | 11.26 | 8.60 |
| W1    | 22.24<br>(0.11)              | 0.87<br>(0.03)               | 0.83                          | 9.04  | 25.6 | 11.04 | 8.39 |
| W2    | 25.58<br>(0.10)              | 0.96<br>(0.04)               | 1.02                          | 9.40  | 26.6 | 10.78 | 8.44 |

Sep 20

| River | NO <sub>3</sub> <sup>-</sup> | NH <sub>4</sub> <sup>+</sup> | PO <sub>4</sub> <sup>3-</sup> | DOC   | temp | DO   | pH   |
|-------|------------------------------|------------------------------|-------------------------------|-------|------|------|------|
| L1    | 34.87<br>(0.06)              | 1.26<br>(0.03)               | 1.03                          | 10.56 | 23.8 | 6.87 | 7.79 |
| L2    | 38.18<br>(0.07)              | 0.98<br>(0.04)               | 0.62                          | 9.72  | 24.6 | 7.15 | 8.01 |

|    |                 |                |      |       |      |       |      |
|----|-----------------|----------------|------|-------|------|-------|------|
| T1 | 32.22<br>(0.05) | 0.96<br>(0.04) | 0.22 | 10.93 | 25.5 | 10.74 | 7.62 |
| T2 | 40.41<br>(0.07) | 0.78<br>(0.03) | 0.48 | 9.88  | 26.2 | 11.18 | 8.48 |
| W1 | 24.56<br>(0.04) | 0.83<br>(0.05) | 0.75 | 9.35  | 25.4 | 11.12 | 8.30 |
| W2 | 28.26<br>(0.04) | 0.87<br>(0.03) | 0.97 | 9.77  | 26.1 | 10.83 | 8.36 |

Sep 28 (after rain)

| River | NO <sub>3</sub> <sup>-</sup> | NH <sub>4</sub> <sup>+</sup> | PO <sub>4</sub> <sup>3-</sup> | DOC   | temp | DO    | pH   |
|-------|------------------------------|------------------------------|-------------------------------|-------|------|-------|------|
| L1    | 38.28<br>(0.09)              | 1.55<br>(0.06)               | 1.28                          | 13.76 | 21.6 | 6.68  | 7.78 |
| L2    | 45.30<br>(0.06)              | 1.32<br>(0.05)               | 0.86                          | 13.06 | 23.8 | 7.02  | 7.97 |
| T1    | 37.76<br>(0.07)              | 1.16<br>(0.05)               | 0.52                          | 14.13 | 22.1 | 10.43 | 7.56 |
| T2    | 44.85<br>(0.06)              | 1.02<br>(0.03)               | 0.67                          | 13.22 | 22.8 | 10.98 | 8.42 |
| W1    | 29.43<br>(0.08)              | 1.15<br>(0.04)               | 0.93                          | 12.58 | 21.3 | 10.82 | 8.18 |
| W2    | 37.14<br>(0.07)              | 1.21<br>(0.03)               | 1.12                          | 14.38 | 22.2 | 10.67 | 8.24 |

Oct 11

| River | NO <sub>3</sub> <sup>-</sup> | NH <sub>4</sub> <sup>+</sup> | PO <sub>4</sub> <sup>3-</sup> | DOC   | temp | DO    | pH   |
|-------|------------------------------|------------------------------|-------------------------------|-------|------|-------|------|
| L1    | 36.42<br>(0.10)              | 1.24<br>(0.04)               | 1.15                          | 10.69 | 18.3 | 6.58  | 8.07 |
| L2    | 41.86<br>(0.08)              | 1.04<br>(0.03)               | 0.74                          | 10.11 | 20.8 | 6.92  | 8.22 |
| T1    | 32.47<br>(0.08)              | 0.93<br>(0.03)               | 0.41                          | 11.10 | 19.5 | 10.22 | 7.99 |
| T2    | 41.37<br>(0.11)              | 0.80<br>(0.03)               | 0.58                          | 10.63 | 20.1 | 10.66 | 8.78 |
| W1    | 27.22<br>(0.09)              | 0.75<br>(0.02)               | 0.83                          | 9.99  | 19.0 | 10.68 | 8.46 |
| W2    | 33.18<br>(0.07)              | 0.82<br>(0.02)               | 1.01                          | 10.30 | 19.8 | 10.52 | 8.50 |

Oct 18

| River | NO <sub>3</sub> <sup>-</sup> | NH <sub>4</sub> <sup>+</sup> | PO <sub>4</sub> <sup>3-</sup> | DOC   | temp | DO    | pH   |
|-------|------------------------------|------------------------------|-------------------------------|-------|------|-------|------|
| L1    | 38.75<br>(0.08)              | 1.17<br>(0.03)               | 1.26                          | 10.84 | 16.4 | 6.36  | 8.10 |
| L2    | 44.46<br>(0.06)              | 0.94<br>(0.04)               | 0.91                          | 10.20 | 17.8 | 6.73  | 8.24 |
| T1    | 31.73<br>(0.06)              | 0.84<br>(0.03)               | 0.62                          | 11.24 | 17.3 | 9.77  | 8.02 |
| T2    | 39.84<br>(0.07)              | 0.74<br>(0.02)               | 0.77                          | 10.70 | 18.5 | 10.24 | 8.73 |
| W1    | 30.35<br>(0.05)              | 0.71<br>(0.03)               | 1.02                          | 10.18 | 17.2 | 10.50 | 8.44 |
| W2    | 34.95<br>(0.06)              | 0.75<br>(0.02)               | 1.13                          | 10.38 | 18.1 | 10.32 | 8.47 |

Oct 24

| River | NO <sub>3</sub> <sup>-</sup> | NH <sub>4</sub> <sup>+</sup> | PO <sub>4</sub> <sup>3-</sup> | DOC   | temp | DO   | pH   |
|-------|------------------------------|------------------------------|-------------------------------|-------|------|------|------|
| L1    | 40.52<br>(0.11)              | 1.12<br>(0.03)               | 1.34                          | 11.17 | 14.6 | 6.13 | 8.13 |
| L2    | 46.38<br>(0.08)              | 0.86<br>(0.05)               | 1.04                          | 10.28 | 16.8 | 6.55 | 8.28 |
| T1    | 30.73<br>(0.06)              | 0.78<br>(0.03)               | 0.72                          | 11.34 | 16.2 | 9.56 | 8.04 |
| T2    | 38.12                        | 0.71                         | 0.85                          | 10.76 | 17.8 | 9.89 | 8.71 |

|    |                 |                |      |       |      |       |      |
|----|-----------------|----------------|------|-------|------|-------|------|
|    | (0.04)          | (0.02)         |      |       |      |       |      |
| W1 | 32.61<br>(0.04) | 0.66<br>(0.02) | 1.12 | 10.35 | 15.8 | 10.08 | 8.41 |
| W2 | 38.23<br>(0.06) | 0.69<br>(0.03) | 1.20 | 10.48 | 16.6 | 9.82  | 8.45 |

Oct 31

| River | NO <sub>3</sub> <sup>-</sup> | NH <sub>4</sub> <sup>+</sup> | PO <sub>4</sub> <sup>3-</sup> | DOC   | temp | DO   | pH   |
|-------|------------------------------|------------------------------|-------------------------------|-------|------|------|------|
| L1    | 42.30<br>(0.10)              | 1.26<br>(0.02)               | 1.29                          | 16.32 | 18.7 | 5.93 | 7.90 |
| L2    | 48.45<br>(0.08)              | 0.98<br>(0.01)               | 1.10                          | 12.88 | 20.4 | 6.16 | 8.42 |
| T1    | 32.55<br>(0.08)              | 0.95<br>(0.02)               | 0.84                          | 15.17 | 19.7 | 8.96 | 8.26 |
| T2    | 38.27<br>(0.06)              | 0.67<br>(0.03)               | 0.96                          | 14.83 | 17.7 | 9.34 | 8.48 |
| W1    | 34.44<br>(0.06)              | 0.73<br>(0.02)               | 1.18                          | 13.45 | 16.3 | 9.51 | 8.43 |
| W2    | 42.02<br>(0.07)              | 0.61<br>(0.02)               | 1.25                          | 14.49 | 15.7 | 9.38 | 8.46 |

Nov 6

| River | NO <sub>3</sub> <sup>-</sup> | NH <sub>4</sub> <sup>+</sup> | PO <sub>4</sub> <sup>3-</sup> | DOC   | temp | DO   | pH   |
|-------|------------------------------|------------------------------|-------------------------------|-------|------|------|------|
| L1    | 44.31<br>(0.11)              | 1.18<br>(0.03)               | 1.27                          | 13.63 | 17.9 | 5.81 | 8.05 |
| L2    | 51.87<br>(0.09)              | 0.93<br>(0.02)               | 1.13                          | 10.84 | 19.4 | 6.03 | 8.36 |
| T1    | 33.99<br>(0.07)              | 0.85<br>(0.02)               | 0.93                          | 13.53 | 18.4 | 8.28 | 8.07 |
| T2    | 36.21<br>(0.10)              | 0.62<br>(0.03)               | 1.02                          | 11.37 | 17.4 | 8.67 | 8.47 |
| W1    | 36.50<br>(0.08)              | 0.52<br>(0.02)               | 1.21                          | 10.67 | 14.4 | 8.94 | 8.27 |
| W2    | 45.01<br>(0.07)              | 0.56<br>(0.01)               | 1.30                          | 11.22 | 14.8 | 8.63 | 8.29 |

Nov 13

| River | NO <sub>3</sub> <sup>-</sup> | NH <sub>4</sub> <sup>+</sup> | PO <sub>4</sub> <sup>3-</sup> | DOC   | temp | DO   | pH   |
|-------|------------------------------|------------------------------|-------------------------------|-------|------|------|------|
| L1    | 42.13<br>(0.12)              | 1.07<br>(0.03)               | 1.29                          | 14.18 | 17.2 | 5.61 | 7.96 |
| L2    | 46.08<br>(0.10)              | 0.87<br>(0.02)               | 1.17                          | 11.32 | 18.7 | 5.76 | 8.18 |
| T1    | 31.13<br>(0.10)              | 0.76<br>(0.03)               | 0.97                          | 12.17 | 17.8 | 7.67 | 8.12 |
| T2    | 34.58<br>(0.07)              | 0.55<br>(0.02)               | 1.08                          | 11.96 | 16.7 | 8.04 | 8.26 |
| W1    | 33.52<br>(0.07)              | 0.41<br>(0.02)               | 1.16                          | 11.30 | 13.2 | 8.31 | 8.04 |
| W2    | 41.13<br>(0.11)              | 0.46<br>(0.01)               | 1.22                          | 12.07 | 13.6 | 8.08 | 8.23 |

Nov 20 (after rain)

| River | NO <sub>3</sub> <sup>-</sup> | NH <sub>4</sub> <sup>+</sup> | PO <sub>4</sub> <sup>3-</sup> | DOC   | temp | DO   | pH   |
|-------|------------------------------|------------------------------|-------------------------------|-------|------|------|------|
| L1    | 44.68<br>(0.16)              | 1.28<br>(0.04)               | 1.35                          | 16.66 | 13.1 | 5.28 | 7.92 |
| L2    | 49.42<br>(0.12)              | 1.16<br>(0.02)               | 1.22                          | 12.28 | 14.5 | 5.36 | 8.04 |
| T1    | 38.66<br>(0.08)              | 1.09<br>(0.03)               | 1.06                          | 13.16 | 13.5 | 7.26 | 7.98 |
| T2    | 45.26<br>(0.10)              | 0.87<br>(0.02)               | 1.16                          | 12.43 | 12.6 | 7.63 | 8.14 |
| W1    | 42.48<br>(0.08)              | 0.72<br>(0.02)               | 1.25                          | 11.78 | 10.1 | 7.82 | 8.02 |

|    |                 |                |      |       |      |      |      |
|----|-----------------|----------------|------|-------|------|------|------|
| W2 | 48.58<br>(0.09) | 0.90<br>(0.03) | 1.30 | 12.85 | 10.5 | 7.56 | 8.12 |
|----|-----------------|----------------|------|-------|------|------|------|

Nov 27

| River | NO <sub>3</sub> <sup>-</sup> | NH <sub>4</sub> <sup>+</sup> | PO <sub>4</sub> <sup>3-</sup> | DOC   | temp | DO   | pH   |
|-------|------------------------------|------------------------------|-------------------------------|-------|------|------|------|
| L1    | 40.75<br>(0.10)              | 1.06<br>(0.06)               | 1.28                          | 14.30 | 10.2 | 5.16 | 7.87 |
| L2    | 45.44<br>(0.07)              | 0.92<br>(0.04)               | 1.14                          | 11.12 | 11.6 | 5.22 | 8.11 |
| T1    | 35.64<br>(0.09)              | 0.77<br>(0.03)               | 0.94                          | 12.06 | 10.8 | 6.72 | 7.95 |
| T2    | 43.80<br>(0.06)              | 0.57<br>(0.03)               | 1.05                          | 11.35 | 10.1 | 7.22 | 8.08 |
| W1    | 36.38<br>(0.08)              | 0.48<br>(0.04)               | 1.17                          | 10.88 | 8.2  | 7.33 | 7.98 |
| W2    | 42.23<br>(0.05)              | 0.62<br>(0.02)               | 1.26                          | 11.82 | 8.8  | 6.96 | 8.09 |

Dec 3

| River | NO <sub>3</sub> <sup>-</sup> | NH <sub>4</sub> <sup>+</sup> | PO <sub>4</sub> <sup>3-</sup> | DOC   | temp | DO   | pH   |
|-------|------------------------------|------------------------------|-------------------------------|-------|------|------|------|
| L1    | 38.55<br>(0.13)              | 0.96<br>(0.05)               | 1.16                          | 11.92 | 7.5  | 4.92 | 7.89 |
| L2    | 43.36<br>(0.10)              | 0.76<br>(0.02)               | 1.05                          | 9.83  | 8.3  | 5.16 | 8.17 |
| T1    | 33.48<br>(0.08)              | 0.62<br>(0.06)               | 0.83                          | 10.20 | 7.7  | 6.53 | 7.92 |
| T2    | 40.62<br>(0.08)              | 0.42<br>(0.05)               | 0.95                          | 8.95  | 7.1  | 6.78 | 8.04 |
| W1    | 33.53<br>(0.06)              | 0.31<br>(0.03)               | 1.06                          | 10.24 | 5.3  | 6.98 | 7.96 |
| W2    | 39.37<br>(0.07)              | 0.36<br>(0.04)               | 1.13                          | 11.12 | 5.8  | 6.71 | 8.07 |

Dec 9

| River | NO <sub>3</sub> <sup>-</sup> | NH <sub>4</sub> <sup>+</sup> | PO <sub>4</sub> <sup>3-</sup> | DOC   | temp | DO   | pH   |
|-------|------------------------------|------------------------------|-------------------------------|-------|------|------|------|
| L1    | 35.36<br>(0.09)              | 1.03<br>(0.03)               | 1.22                          | 12.81 | 5.8  | 4.79 | 8.01 |
| L2    | 39.94<br>(0.07)              | 0.88<br>(0.04)               | 1.09                          | 10.45 | 6.6  | 4.96 | 8.13 |
| T1    | 32.06<br>(0.04)              | 0.74<br>(0.03)               | 0.87                          | 11.49 | 5.5  | 6.24 | 7.75 |
| T2    | 38.10<br>(0.05)              | 0.58<br>(0.02)               | 0.99                          | 10.31 | 5.0  | 6.44 | 8.01 |
| W1    | 31.69<br>(0.06)              | 0.38<br>(0.03)               | 1.10                          | 11.32 | 4.4  | 6.68 | 7.92 |
| W2    | 36.44<br>(0.04)              | 0.47<br>(0.02)               | 1.18                          | 12.61 | 4.8  | 6.40 | 8.02 |

Dec 15

| River | NO <sub>3</sub> <sup>-</sup> | NH <sub>4</sub> <sup>+</sup> | PO <sub>4</sub> <sup>3-</sup> | DOC   | temp | DO   | pH   |
|-------|------------------------------|------------------------------|-------------------------------|-------|------|------|------|
| L1    | 33.26<br>(0.08)              | 0.92<br>(0.04)               | 1.27                          | 13.88 | 4.4  | 4.62 | 7.92 |
| L2    | 36.35<br>(0.06)              | 0.73<br>(0.05)               | 1.12                          | 11.55 | 5.3  | 4.78 | 8.02 |
| T1    | 29.58<br>(0.07)              | 0.61<br>(0.04)               | 0.92                          | 12.52 | 4.6  | 5.98 | 7.89 |
| T2    | 36.53<br>(0.06)              | 0.45<br>(0.03)               | 1.06                          | 11.27 | 4.0  | 6.14 | 8.10 |
| W1    | 28.18<br>(0.06)              | 0.31<br>(0.03)               | 1.15                          | 12.48 | 3.5  | 6.33 | 8.04 |
| W2    | 33.81<br>(0.05)              | 0.39<br>(0.02)               | 1.23                          | 13.64 | 4.1  | 6.10 | 8.13 |

Dec 22

| River | NO <sub>3</sub> <sup>-</sup> | NH <sub>4</sub> <sup>+</sup> | PO <sub>4</sub> <sup>3-</sup> | DOC   | temp | DO   | pH   |
|-------|------------------------------|------------------------------|-------------------------------|-------|------|------|------|
| L1    | 30.42<br>(0.08)              | 0.86<br>(0.05)               | 1.33                          | 15.36 | 2.1  | 4.13 | 8.02 |
| L2    | 33.58<br>(0.07)              | 0.68<br>(0.04)               | 1.18                          | 13.01 | 2.8  | 4.27 | 8.14 |
| T1    | 25.66<br>(0.07)              | 0.66<br>(0.04)               | 0.98                          | 14.23 | 2.4  | 5.30 | 7.97 |
| T2    | 34.18<br>(0.05)              | 0.53<br>(0.05)               | 1.10                          | 12.66 | 1.9  | 5.48 | 8.21 |
| W1    | 24.88<br>(0.06)              | 0.38<br>(0.04)               | 1.22                          | 13.73 | 1.3  | 5.72 | 8.17 |
| W2    | 29.16<br>(0.04)              | 0.44<br>(0.02)               | 1.29                          | 14.90 | 1.8  | 5.42 | 8.25 |

Mar 9

| River | NO <sub>3</sub> <sup>-</sup> | NH <sub>4</sub> <sup>+</sup> | PO <sub>4</sub> <sup>3-</sup> | DOC  | temp | DO   | pH   |
|-------|------------------------------|------------------------------|-------------------------------|------|------|------|------|
| L1    | 25.36<br>(0.11)              | 1.92<br>(0.03)               | 1.06                          | 6.00 | 11.4 | 5.86 | 8.35 |
| L2    | 27.38<br>(0.08)              | 1.42<br>(0.01)               | 0.78                          | 4.92 | 11.9 | 6.14 | 8.66 |
| T1    | 24.06<br>(0.06)              | 1.26<br>(0.01)               | 0.55                          | 6.27 | 7.2  | 6.24 | 7.55 |
| T2    | 33.13<br>(0.08)              | 1.21<br>(0.04)               | 0.67                          | 5.76 | 6.2  | 6.72 | 7.77 |
| W1    | 20.47<br>(0.10)              | 1.52<br>(0.02)               | 0.84                          | 5.07 | 9.1  | 7.18 | 8.18 |
| W2    | 23.72<br>(0.07)              | 1.77<br>(0.03)               | 0.97                          | 6.35 | 10.2 | 6.92 | 8.32 |

Mar 22 (more aquatic vegetation at each site)

| River | NO <sub>3</sub> <sup>-</sup> | NH <sub>4</sub> <sup>+</sup> | PO <sub>4</sub> <sup>3-</sup> | DOC  | temp | DO   | pH   |
|-------|------------------------------|------------------------------|-------------------------------|------|------|------|------|
| L1    | 29.84<br>(0.08)              | 1.68<br>(0.01)               | 0.93                          | 6.58 | 12.8 | 6.16 | 8.01 |
| L2    | 28.46<br>(0.06)              | 1.36<br>(0.02)               | 0.65                          | 5.48 | 13.8 | 6.42 | 8.33 |
| T1    | 27.08<br>(0.07)              | 1.71<br>(0.03)               | 0.41                          | 7.02 | 14.5 | 6.65 | 8.22 |
| T2    | 35.37<br>(0.06)              | 1.55<br>(0.04)               | 0.53                          | 7.29 | 15.4 | 7.20 | 8.04 |
| W1    | 22.36<br>(0.06)              | 1.86<br>(0.03)               | 0.79                          | 5.69 | 16.3 | 7.35 | 8.17 |
| W2    | 26.02<br>(0.04)              | 2.07<br>(0.02)               | 0.86                          | 6.26 | 15.8 | 7.13 | 8.35 |

Mar 30

| River | NO <sub>3</sub> <sup>-</sup> | NH <sub>4</sub> <sup>+</sup> | PO <sub>4</sub> <sup>3-</sup> | DOC  | temp | DO   | pH   |
|-------|------------------------------|------------------------------|-------------------------------|------|------|------|------|
| L1    | 33.12<br>(0.07)              | 2.17<br>(0.05)               | 0.82                          | 7.00 | 17.6 | 6.33 | 8.14 |
| L2    | 31.48<br>(0.08)              | 1.73<br>(0.06)               | 0.57                          | 6.40 | 18.5 | 6.71 | 8.28 |
| T1    | 29.27<br>(0.06)              | 1.67<br>(0.03)               | 0.36                          | 6.00 | 11.4 | 6.87 | 8.04 |
| T2    | 37.33<br>(0.05)              | 1.93<br>(0.04)               | 0.45                          | 6.91 | 15.2 | 7.34 | 7.90 |
| W1    | 23.94<br>(0.06)              | 2.19<br>(0.06)               | 0.66                          | 6.04 | 18.4 | 7.46 | 8.09 |
| W2    | 28.82<br>(0.04)              | 2.48<br>(0.03)               | 0.78                          | 6.80 | 18.0 | 7.24 | 8.23 |

Apr 6

| River | NO <sub>3</sub> <sup>-</sup> | NH <sub>4</sub> <sup>+</sup> | PO <sub>4</sub> <sup>3-</sup> | DOC  | temp | DO   | pH   |
|-------|------------------------------|------------------------------|-------------------------------|------|------|------|------|
| L1    | 29.58<br>(0.08)              | 2.40<br>(0.04)               | 0.89                          | 6.46 | 18.7 | 6.26 | 8.33 |

|    |                 |                |      |      |      |      |      |
|----|-----------------|----------------|------|------|------|------|------|
| L2 | 30.62<br>(0.10) | 2.25<br>(0.05) | 0.63 | 6.00 | 19.6 | 6.62 | 8.45 |
| T1 | 28.80<br>(0.08) | 1.72<br>(0.04) | 0.41 | 5.90 | 13.5 | 6.78 | 8.08 |
| T2 | 37.85<br>(0.09) | 2.04<br>(0.06) | 0.49 | 6.75 | 15.3 | 7.30 | 7.74 |
| W1 | 25.81<br>(0.07) | 1.89<br>(0.03) | 0.59 | 5.20 | 17.5 | 7.55 | 8.31 |
| W2 | 30.84<br>(0.06) | 1.94<br>(0.04) | 0.68 | 5.32 | 16.4 | 7.32 | 8.36 |

Apr 15

| River | NO <sub>3</sub> <sup>-</sup> | NH <sub>4</sub> <sup>+</sup> | PO <sub>4</sub> <sup>3-</sup> | DOC  | temp | DO   | pH   |
|-------|------------------------------|------------------------------|-------------------------------|------|------|------|------|
| L1    | 33.62<br>(0.08)              | 2.28<br>(0.05)               | 0.76                          | 6.69 | 14.6 | 6.56 | 8.22 |
| L2    | 36.68<br>(0.06)              | 1.97<br>(0.06)               | 0.54                          | 6.34 | 15.4 | 6.89 | 8.34 |
| T1    | 26.53<br>(0.06)              | 1.82<br>(0.04)               | 0.48                          | 6.46 | 17.8 | 6.48 | 8.18 |
| T2    | 34.74<br>(0.05)              | 2.12<br>(0.03)               | 0.60                          | 6.62 | 19.2 | 6.93 | 7.83 |
| W1    | 22.42<br>(0.04)              | 2.01<br>(0.04)               | 0.65                          | 5.63 | 21.5 | 7.27 | 8.15 |
| W2    | 26.68<br>(0.04)              | 2.13<br>(0.03)               | 0.72                          | 5.90 | 20.8 | 7.08 | 8.26 |

May 3

| River | NO <sub>3</sub> <sup>-</sup> | NH <sub>4</sub> <sup>+</sup> | PO <sub>4</sub> <sup>3-</sup> | DOC  | temp | DO   | pH   |
|-------|------------------------------|------------------------------|-------------------------------|------|------|------|------|
| L1    | 26.45<br>(0.08)              | 2.82<br>(0.04)               | 0.54                          | 5.90 | 19.4 | 7.45 | 8.21 |
| L2    | 29.59<br>(0.07)              | 2.41<br>(0.04)               | 0.36                          | 5.09 | 20.4 | 7.63 | 8.54 |
| T1    | 24.15<br>(0.06)              | 2.18<br>(0.04)               | 0.27                          | 6.50 | 21.3 | 7.16 | 8.20 |
| T2    | 30.96<br>(0.06)              | 2.23<br>(0.03)               | 0.40                          | 5.75 | 21.6 | 7.55 | 8.11 |
| W1    | 24.80<br>(0.06)              | 1.96<br>(0.03)               | 0.58                          | 5.20 | 20.3 | 7.82 | 8.46 |
| W2    | 28.40<br>(0.06)              | 2.09<br>(0.03)               | 0.66                          | 5.73 | 20.7 | 7.60 | 8.52 |

May 16 (after rain)

| River | NO <sub>3</sub> <sup>-</sup> | NH <sub>4</sub> <sup>+</sup> | PO <sub>4</sub> <sup>3-</sup> | DOC  | temp | DO   | pH   |
|-------|------------------------------|------------------------------|-------------------------------|------|------|------|------|
| L1    | 31.84<br>(0.06)              | 3.19<br>(0.04)               | 0.83                          | 6.55 | 20.5 | 7.83 | 8.12 |
| L2    | 33.01<br>(0.07)              | 2.85<br>(0.04)               | 0.57                          | 5.76 | 21.2 | 8.14 | 8.32 |
| T1    | 28.86<br>(0.06)              | 2.39<br>(0.03)               | 0.46                          | 6.87 | 22.2 | 7.52 | 8.29 |
| T2    | 33.34<br>(0.05)              | 2.46<br>(0.04)               | 0.60                          | 6.28 | 22.7 | 7.83 | 8.22 |
| W1    | 27.62<br>(0.04)              | 2.43<br>(0.04)               | 0.75                          | 5.61 | 23.0 | 8.24 | 8.34 |
| W2    | 31.26<br>(0.05)              | 2.56<br>(0.03)               | 0.91                          | 6.19 | 23.5 | 8.08 | 8.56 |

May 22

| River | NO <sub>3</sub> <sup>-</sup> | NH <sub>4</sub> <sup>+</sup> | PO <sub>4</sub> <sup>3-</sup> | DOC  | temp | DO   | pH   |
|-------|------------------------------|------------------------------|-------------------------------|------|------|------|------|
| L1    | 28.82<br>(0.07)              | 2.96<br>(0.03)               | 0.68                          | 6.15 | 23.4 | 8.02 | 8.23 |
| L2    | 30.21<br>(0.06)              | 2.62<br>(0.03)               | 0.45                          | 5.42 | 24.2 | 8.21 | 8.40 |
| T1    | 27.10                        | 2.29                         | 0.37                          | 6.63 | 25.3 | 7.67 | 8.38 |

|    |                 |                |      |      |      |      |      |
|----|-----------------|----------------|------|------|------|------|------|
|    | (0.06)          | (0.04)         |      |      |      |      |      |
| T2 | 31.57<br>(0.05) | 2.32<br>(0.03) | 0.49 | 6.03 | 26.0 | 7.97 | 8.32 |
| W1 | 26.36<br>(0.05) | 2.14<br>(0.02) | 0.63 | 5.47 | 26.8 | 8.43 | 8.41 |
| W2 | 29.45<br>(0.05) | 2.28<br>(0.03) | 0.77 | 5.92 | 27.5 | 8.29 | 8.48 |

June 11

| River | NO <sub>3</sub> <sup>-</sup> | NH <sub>4</sub> <sup>+</sup> | PO <sub>4</sub> <sup>3-</sup> | DOC  | temp | DO   | pH   |
|-------|------------------------------|------------------------------|-------------------------------|------|------|------|------|
| L1    | 23.37<br>(0.06)              | 3.30<br>(0.01)               | 0.61                          | 5.76 | 28.5 | 8.33 | 7.78 |
| L2    | 22.96<br>(0.06)              | 3.12<br>(0.03)               | 0.38                          | 5.25 | 32.7 | 8.55 | 8.03 |
| T1    | 17.62<br>(0.05)              | 2.45<br>(0.02)               | 0.31                          | 5.66 | 28.4 | 8.04 | 7.57 |
| T2    | 29.12<br>(0.03)              | 2.57<br>(0.03)               | 0.42                          | 5.63 | 28.0 | 8.32 | 7.43 |
| W1    | 13.85<br>(0.04)              | 2.48<br>(0.02)               | 0.54                          | 4.62 | 31.4 | 8.72 | 8.10 |
| W2    | 18.99<br>(0.03)              | 2.63<br>(0.02)               | 0.69                          | 5.26 | 31.6 | 8.58 | 8.22 |

June 19 (eutrophication occurred at L2 and W1 sites)

| River | NO <sub>3</sub> <sup>-</sup> | NH <sub>4</sub> <sup>+</sup> | PO <sub>4</sub> <sup>3-</sup> | DOC  | temp | DO   | pH   |
|-------|------------------------------|------------------------------|-------------------------------|------|------|------|------|
| L1    | 25.74<br>(0.05)              | 3.37<br>(0.03)               | 0.54                          | 5.97 | 30.2 | 8.47 | 8.01 |
| L2    | 26.66<br>(0.04)              | 3.24<br>(0.02)               | 0.47                          | 5.54 | 33.4 | 8.38 | 8.28 |
| T1    | 22.27<br>(0.05)              | 2.52<br>(0.03)               | 0.23                          | 5.85 | 30.6 | 8.28 | 7.81 |
| T2    | 34.26<br>(0.04)              | 2.65<br>(0.03)               | 0.33                          | 5.70 | 31.8 | 8.63 | 7.74 |
| W1    | 18.33<br>(0.04)              | 2.60<br>(0.02)               | 0.66                          | 5.22 | 32.6 | 8.59 | 8.32 |
| W2    | 20.78<br>(0.03)              | 2.72<br>(0.02)               | 0.73                          | 5.58 | 33.5 | 8.65 | 8.43 |

June 24 (after rain)

| River | NO <sub>3</sub> <sup>-</sup> | NH <sub>4</sub> <sup>+</sup> | PO <sub>4</sub> <sup>3-</sup> | DOC  | temp | DO   | pH   |
|-------|------------------------------|------------------------------|-------------------------------|------|------|------|------|
| L1    | 28.64<br>(0.04)              | 3.14<br>(0.02)               | 0.77                          | 6.34 | 26.4 | 8.53 | 7.83 |
| L2    | 29.13<br>(0.04)              | 3.03<br>(0.03)               | 0.64                          | 5.92 | 27.5 | 8.36 | 8.04 |
| T1    | 25.48<br>(0.03)              | 2.40<br>(0.02)               | 0.41                          | 6.18 | 28.7 | 8.12 | 7.67 |
| T2    | 36.60<br>(0.02)              | 2.57<br>(0.02)               | 0.50                          | 6.04 | 29.6 | 8.50 | 7.54 |
| W1    | 22.71<br>(0.05)              | 2.49<br>(0.03)               | 0.85                          | 5.51 | 30.8 | 8.42 | 8.13 |
| W2    | 25.47<br>(0.04)              | 2.60<br>(0.02)               | 0.97                          | 5.86 | 31.5 | 8.45 | 8.27 |

July 6 (continuous precipitation increased the water level and flow at each site)

| River | NO <sub>3</sub> <sup>-</sup> | NH <sub>4</sub> <sup>+</sup> | PO <sub>4</sub> <sup>3-</sup> | DOC  | temp | DO   | pH   |
|-------|------------------------------|------------------------------|-------------------------------|------|------|------|------|
| L1    | 27.67<br>(0.05)              | 3.22<br>(0.03)               | 0.87                          | 6.55 | 27.5 | 8.42 | 7.97 |
| L2    | 28.14<br>(0.04)              | 3.10<br>(0.02)               | 0.73                          | 6.16 | 28.3 | 8.22 | 8.16 |
| T1    | 24.84<br>(0.02)              | 2.48<br>(0.02)               | 0.48                          | 6.38 | 29.4 | 8.03 | 7.78 |
| T2    | 34.55<br>(0.03)              | 2.63<br>(0.03)               | 0.62                          | 6.26 | 30.3 | 8.37 | 7.66 |

|    |                 |                |      |      |      |      |      |
|----|-----------------|----------------|------|------|------|------|------|
| W1 | 21.38<br>(0.02) | 2.54<br>(0.02) | 0.98 | 5.80 | 31.4 | 8.30 | 8.25 |
| W2 | 23.30<br>(0.02) | 2.69<br>(0.03) | 1.11 | 6.12 | 32.2 | 8.26 | 8.34 |

July 17 (after rain)

| River | NO <sub>3</sub> <sup>-</sup> | NH <sub>4</sub> <sup>+</sup> | PO <sub>4</sub> <sup>3-</sup> | DOC  | temp | DO   | pH   |
|-------|------------------------------|------------------------------|-------------------------------|------|------|------|------|
| L1    | 25.88<br>(0.04)              | 3.03<br>(0.03)               | 1.03                          | 6.72 | 24.3 | 8.22 | 7.74 |
| L2    | 26.36<br>(0.04)              | 2.85<br>(0.03)               | 0.84                          | 6.34 | 25.1 | 8.06 | 7.87 |
| T1    | 23.08<br>(0.03)              | 2.24<br>(0.04)               | 0.61                          | 6.50 | 26.6 | 7.87 | 7.56 |
| T2    | 32.83<br>(0.04)              | 2.41<br>(0.03)               | 0.74                          | 6.44 | 27.3 | 8.25 | 7.48 |
| W1    | 19.67<br>(0.03)              | 2.28<br>(0.02)               | 1.07                          | 6.01 | 28.0 | 8.13 | 8.04 |
| W2    | 21.18<br>(0.03)              | 2.47<br>(0.02)               | 1.23                          | 6.33 | 28.6 | 8.02 | 8.16 |

July 24 (eutrophication mitigated at W1 site)

| River | NO <sub>3</sub> <sup>-</sup> | NH <sub>4</sub> <sup>+</sup> | PO <sub>4</sub> <sup>3-</sup> | DOC  | temp | DO   | pH   |
|-------|------------------------------|------------------------------|-------------------------------|------|------|------|------|
| L1    | 21.28<br>(0.05)              | 2.82<br>(0.02)               | 0.89                          | 6.13 | 28.8 | 8.18 | 7.78 |
| L2    | 24.62<br>(0.04)              | 3.11<br>(0.04)               | 0.80                          | 5.83 | 30.2 | 7.74 | 7.95 |
| T1    | 22.29<br>(0.05)              | 2.42<br>(0.04)               | 0.55                          | 6.06 | 31.4 | 7.49 | 7.72 |
| T2    | 31.88<br>(0.05)              | 2.48<br>(0.02)               | 0.67                          | 5.69 | 31.1 | 8.10 | 7.85 |
| W1    | 17.26<br>(0.04)              | 2.36<br>(0.03)               | 0.98                          | 5.55 | 29.8 | 7.94 | 8.06 |
| W2    | 19.48<br>(0.04)              | 2.53<br>(0.03)               | 1.16                          | 5.78 | 29.4 | 7.81 | 8.20 |

Aug 15 (after rain, eutrophication disappeared at W1 site)

| River | NO <sub>3</sub> <sup>-</sup> | NH <sub>4</sub> <sup>+</sup> | PO <sub>4</sub> <sup>3-</sup> | DOC  | temp | DO   | pH   |
|-------|------------------------------|------------------------------|-------------------------------|------|------|------|------|
| L1    | 26.24<br>(0.05)              | 2.56<br>(0.03)               | 1.02                          | 5.55 | 26.6 | 8.38 | 7.61 |
| L2    | 25.72<br>(0.04)              | 2.78<br>(0.03)               | 0.96                          | 5.26 | 27.8 | 7.98 | 7.84 |
| T1    | 22.86<br>(0.04)              | 2.17<br>(0.02)               | 0.66                          | 5.40 | 29.3 | 7.74 | 7.53 |
| T2    | 32.90<br>(0.03)              | 2.29<br>(0.02)               | 0.81                          | 5.11 | 29.9 | 8.26 | 7.66 |
| W1    | 18.93<br>(0.03)              | 2.08<br>(0.03)               | 1.11                          | 4.79 | 28.7 | 8.06 | 7.88 |
| W2    | 20.31<br>(0.04)              | 2.23<br>(0.02)               | 1.33                          | 5.18 | 28.1 | 7.95 | 8.04 |

Aug 21

| River | NO <sub>3</sub> <sup>-</sup> | NH <sub>4</sub> <sup>+</sup> | PO <sub>4</sub> <sup>3-</sup> | DOC  | temp | DO   | pH   |
|-------|------------------------------|------------------------------|-------------------------------|------|------|------|------|
| L1    | 31.08<br>(0.04)              | 2.90<br>(0.02)               | 1.10                          | 4.82 | 29.4 | 8.05 | 8.16 |
| L2    | 29.07<br>(0.02)              | 3.33<br>(0.02)               | 1.04                          | 4.66 | 30.3 | 7.64 | 8.05 |
| T1    | 25.02<br>(0.03)              | 1.74<br>(0.03)               | 0.53                          | 4.75 | 27.1 | 8.02 | 7.68 |
| T2    | 34.90<br>(0.02)              | 2.04<br>(0.03)               | 0.71                          | 4.47 | 28.4 | 8.41 | 7.80 |
| W1    | 13.82<br>(0.03)              | 2.18<br>(0.02)               | 1.17                          | 4.33 | 28.9 | 7.93 | 8.02 |
| W2    | 16.25                        | 2.56                         | 1.48                          | 4.67 | 29.6 | 7.35 | 8.19 |



|  |        |        |  |  |  |  |  |
|--|--------|--------|--|--|--|--|--|
|  | (0.02) | (0.02) |  |  |  |  |  |
|--|--------|--------|--|--|--|--|--|

Table S2. Flux of nutrients at sediment-water interface. The number in the parentheses represents the standard deviation.

Autumn flux

L1

| DO C <sub>0</sub>                            | DO C <sub>1</sub>                            | DO C <sub>2</sub>                            | DO flux 1                            | DO flux 2                            |
|----------------------------------------------|----------------------------------------------|----------------------------------------------|--------------------------------------|--------------------------------------|
| 5.39                                         | 4.12                                         | 3.63                                         | -0.03                                | -0.01                                |
| 5.31                                         | 4.04                                         | 3.47                                         | -0.03                                | -0.01                                |
| 5.35                                         | 4.22                                         | 3.53                                         | -0.03                                | -0.01                                |
| NO <sub>3</sub> <sup>-</sup> C <sub>0</sub>  | NO <sub>3</sub> <sup>-</sup> C <sub>1</sub>  | NO <sub>3</sub> <sup>-</sup> C <sub>2</sub>  | NO <sub>3</sub> <sup>-</sup> flux 1  | NO <sub>3</sub> <sup>-</sup> flux 2  |
| 29.30 (0.11)                                 | 24.81 (0.08)                                 | 26.72 (0.07)                                 | -0.12                                | 0.02                                 |
| 29.30 (0.11)                                 | 24.63 (0.06)                                 | 27.18 (0.06)                                 | -0.12                                | 0.03                                 |
| 29.30 (0.11)                                 | 24.76 (0.05)                                 | 26.86 (0.06)                                 | -0.12                                | 0.02                                 |
| NH <sub>4</sub> <sup>+</sup> C <sub>0</sub>  | NH <sub>4</sub> <sup>+</sup> C <sub>1</sub>  | NH <sub>4</sub> <sup>+</sup> C <sub>2</sub>  | NH <sub>4</sub> <sup>+</sup> flux 1  | NH <sub>4</sub> <sup>+</sup> flux 2  |
| 1.76 (0.06)                                  | 2.08 (0.04)                                  | 1.85 (0.03)                                  | 0.01                                 | -0.003                               |
| 1.76 (0.06)                                  | 2.16 (0.02)                                  | 1.84 (0.02)                                  | 0.01                                 | -0.004                               |
| 1.76 (0.06)                                  | 2.13 (0.04)                                  | 1.82 (0.02)                                  | 0.01                                 | -0.004                               |
| PO <sub>4</sub> <sup>3-</sup> C <sub>0</sub> | PO <sub>4</sub> <sup>3-</sup> C <sub>1</sub> | PO <sub>4</sub> <sup>3-</sup> C <sub>2</sub> | PO <sub>4</sub> <sup>3-</sup> flux 1 | PO <sub>4</sub> <sup>3-</sup> flux 2 |
| 1.33                                         | 1.14                                         | 0.96                                         | -0.005                               | -0.002                               |
| 1.33                                         | 1.16                                         | 1.07                                         | -0.005                               | -0.001                               |
| 1.33                                         | 1.13                                         | 0.93                                         | -0.005                               | -0.002                               |
| DOC C <sub>0</sub>                           | DOC C <sub>1</sub>                           | DOC C <sub>2</sub>                           | DOC flux 1                           | DOC flux 2                           |
| 10.02                                        | 8.89                                         | 8.63                                         | -0.03                                | -0.003                               |
| 10.02                                        | 8.52                                         | 8.28                                         | -0.04                                | -0.003                               |
| 10.02                                        | 8.96                                         | 8.52                                         | -0.03                                | -0.005                               |

L2

| DO C <sub>0</sub>                            | DO C <sub>1</sub>                            | DO C <sub>2</sub>                            | DO flux 1                            | DO flux 2                            |
|----------------------------------------------|----------------------------------------------|----------------------------------------------|--------------------------------------|--------------------------------------|
| 5.74                                         | 4.68                                         | 4.03                                         | -0.03                                | -0.01                                |
| 5.66                                         | 4.61                                         | 3.94                                         | -0.03                                | -0.01                                |
| 5.69                                         | 4.66                                         | 4.06                                         | -0.03                                | -0.01                                |
| NO <sub>3</sub> <sup>-</sup> C <sub>0</sub>  | NO <sub>3</sub> <sup>-</sup> C <sub>1</sub>  | NO <sub>3</sub> <sup>-</sup> C <sub>2</sub>  | NO <sub>3</sub> <sup>-</sup> flux 1  | NO <sub>3</sub> <sup>-</sup> flux 2  |
| 33.31 (0.10)                                 | 37.35 (0.06)                                 | 40.91 (0.08)                                 | 0.11                                 | 0.04                                 |
| 33.31 (0.10)                                 | 37.53 (0.06)                                 | 40.62 (0.10)                                 | 0.11                                 | 0.04                                 |
| 33.31 (0.10)                                 | 37.55 (0.04)                                 | 40.71 (0.04)                                 | 0.11                                 | 0.04                                 |
| NH <sub>4</sub> <sup>+</sup> C <sub>0</sub>  | NH <sub>4</sub> <sup>+</sup> C <sub>1</sub>  | NH <sub>4</sub> <sup>+</sup> C <sub>2</sub>  | NH <sub>4</sub> <sup>+</sup> flux 1  | NH <sub>4</sub> <sup>+</sup> flux 2  |
| 1.34 (0.06)                                  | 1.52 (0.03)                                  | 1.71 (0.04)                                  | 0.01                                 | 0.002                                |
| 1.34 (0.06)                                  | 1.58 (0.02)                                  | 1.68 (0.04)                                  | 0.01                                 | 0.001                                |
| 1.34 (0.06)                                  | 1.55 (0.03)                                  | 1.66 (0.03)                                  | 0.01                                 | 0.001                                |
| PO <sub>4</sub> <sup>3-</sup> C <sub>0</sub> | PO <sub>4</sub> <sup>3-</sup> C <sub>1</sub> | PO <sub>4</sub> <sup>3-</sup> C <sub>2</sub> | PO <sub>4</sub> <sup>3-</sup> flux 1 | PO <sub>4</sub> <sup>3-</sup> flux 2 |
| 0.98                                         | 1.25                                         | 1.34                                         | 0.008                                | 0.001                                |
| 0.98                                         | 1.27                                         | 1.37                                         | 0.008                                | 0.001                                |
| 0.98                                         | 1.28                                         | 1.42                                         | 0.008                                | 0.002                                |
| DOC C <sub>0</sub>                           | DOC C <sub>1</sub>                           | DOC C <sub>2</sub>                           | DOC flux 1                           | DOC flux 2                           |
| 8.68                                         | 12.45                                        | 15.97                                        | 0.10                                 | 0.04                                 |
| 8.68                                         | 12.82                                        | 16.36                                        | 0.11                                 | 0.04                                 |
| 8.68                                         | 12.76                                        | 16.21                                        | 0.11                                 | 0.04                                 |

T1

| DO C <sub>0</sub>                           | DO C <sub>1</sub>                           | DO C <sub>2</sub>                           | DO flux 1                           | DO flux 2                           |
|---------------------------------------------|---------------------------------------------|---------------------------------------------|-------------------------------------|-------------------------------------|
| 7.12                                        | 6.33                                        | 5.63                                        | -0.02                               | -0.01                               |
| 7.27                                        | 6.24                                        | 5.47                                        | -0.03                               | -0.01                               |
| 7.16                                        | 6.16                                        | 5.56                                        | -0.03                               | -0.01                               |
| NO <sub>3</sub> <sup>-</sup> C <sub>0</sub> | NO <sub>3</sub> <sup>-</sup> C <sub>1</sub> | NO <sub>3</sub> <sup>-</sup> C <sub>2</sub> | NO <sub>3</sub> <sup>-</sup> flux 1 | NO <sub>3</sub> <sup>-</sup> flux 2 |
| 30.18 (0.08)                                | 35.26 (0.09)                                | 33.77 (0.08)                                | 0.13                                | -0.02                               |
| 30.18 (0.08)                                | 35.48 (0.05)                                | 34.22 (0.06)                                | 0.14                                | -0.01                               |
| 30.18 (0.08)                                | 35.36 (0.04)                                | 34.39 (0.05)                                | 0.14                                | -0.01                               |
| NH <sub>4</sub> <sup>+</sup> C <sub>0</sub> | NH <sub>4</sub> <sup>+</sup> C <sub>1</sub> | NH <sub>4</sub> <sup>+</sup> C <sub>2</sub> | NH <sub>4</sub> <sup>+</sup> flux 1 | NH <sub>4</sub> <sup>+</sup> flux 2 |
| 1.15 (0.04)                                 | 1.53 (0.03)                                 | 1.35 (0.03)                                 | 0.01                                | -0.002                              |
| 1.15 (0.04)                                 | 1.80 (0.02)                                 | 1.71 (0.02)                                 | 0.02                                | -0.001                              |

|                                              |                                              |                                              |                                      |                                      |
|----------------------------------------------|----------------------------------------------|----------------------------------------------|--------------------------------------|--------------------------------------|
| 1.15 (0.04)                                  | 1.71 (0.02)                                  | 1.53 (0.03)                                  | 0.01                                 | -0.002                               |
| PO <sub>4</sub> <sup>3-</sup> C <sub>0</sub> | PO <sub>4</sub> <sup>3-</sup> C <sub>1</sub> | PO <sub>4</sub> <sup>3-</sup> C <sub>2</sub> | PO <sub>4</sub> <sup>3-</sup> flux 1 | PO <sub>4</sub> <sup>3-</sup> flux 2 |
| 0.56                                         | 0.83                                         | 0.72                                         | 0.007                                | -0.001                               |
| 0.56                                         | 0.78                                         | 0.67                                         | 0.007                                | -0.001                               |
| 0.56                                         | 0.86                                         | 0.74                                         | 0.007                                | -0.001                               |
| DOC C <sub>0</sub>                           | DOC C <sub>1</sub>                           | DOC C <sub>2</sub>                           | DOC flux 1                           | DOC flux 2                           |
| 9.84                                         | 10.59                                        | 9.71                                         | 0.02                                 | -0.01                                |
| 9.84                                         | 10.51                                        | 10.96                                        | 0.02                                 | -0.02                                |
| 9.84                                         | 10.66                                        | 10.77                                        | 0.02                                 | -0.01                                |

T2

|                                              |                                              |                                              |                                      |                                      |
|----------------------------------------------|----------------------------------------------|----------------------------------------------|--------------------------------------|--------------------------------------|
| DO C <sub>0</sub>                            | DO C <sub>1</sub>                            | DO C <sub>2</sub>                            | DO flux 1                            | DO flux 2                            |
| 7.59                                         | 6.72                                         | 6.13                                         | -0.02                                | -0.01                                |
| 7.71                                         | 6.64                                         | 6.02                                         | -0.03                                | -0.01                                |
| 7.65                                         | 6.59                                         | 5.83                                         | -0.03                                | -0.01                                |
| NO <sub>3</sub> <sup>-</sup> C <sub>0</sub>  | NO <sub>3</sub> <sup>-</sup> C <sub>1</sub>  | NO <sub>3</sub> <sup>-</sup> C <sub>2</sub>  | NO <sub>3</sub> <sup>-</sup> flux 1  | NO <sub>3</sub> <sup>-</sup> flux 2  |
| 38.55 (0.08)                                 | 36.76 (0.07)                                 | 35.38 (0.06)                                 | -0.05                                | -0.02                                |
| 38.55 (0.08)                                 | 36.88 (0.04)                                 | 35.62 (0.02)                                 | -0.05                                | -0.01                                |
| 38.55 (0.08)                                 | 36.82 (0.03)                                 | 35.21 (0.03)                                 | -0.05                                | -0.02                                |
| NH <sub>4</sub> <sup>+</sup> C <sub>0</sub>  | NH <sub>4</sub> <sup>+</sup> C <sub>1</sub>  | NH <sub>4</sub> <sup>+</sup> C <sub>2</sub>  | NH <sub>4</sub> <sup>+</sup> flux 1  | NH <sub>4</sub> <sup>+</sup> flux 2  |
| 0.96 (0.04)                                  | 1.26 (0.03)                                  | 1.44 (0.02)                                  | 0.01                                 | 0.002                                |
| 0.96 (0.04)                                  | 1.19 (0.02)                                  | 1.50 (0.03)                                  | 0.01                                 | 0.004                                |
| 0.96 (0.04)                                  | 1.29 (0.02)                                  | 1.56 (0.03)                                  | 0.01                                 | 0.003                                |
| PO <sub>4</sub> <sup>3-</sup> C <sub>0</sub> | PO <sub>4</sub> <sup>3-</sup> C <sub>1</sub> | PO <sub>4</sub> <sup>3-</sup> C <sub>2</sub> | PO <sub>4</sub> <sup>3-</sup> flux 1 | PO <sub>4</sub> <sup>3-</sup> flux 2 |
| 0.84                                         | 1.22                                         | 1.04                                         | 0.01                                 | -0.002                               |
| 0.84                                         | 1.15                                         | 0.96                                         | 0.01                                 | -0.002                               |
| 0.84                                         | 1.18                                         | 0.92                                         | 0.01                                 | -0.003                               |
| DOC C <sub>0</sub>                           | DOC C <sub>1</sub>                           | DOC C <sub>2</sub>                           | DOC flux 1                           | DOC flux 2                           |
| 9.37                                         | 13.14                                        | 15.78                                        | 0.10                                 | 0.03                                 |
| 9.37                                         | 13.35                                        | 15.12                                        | 0.10                                 | 0.02                                 |
| 9.37                                         | 13.29                                        | 15.96                                        | 0.10                                 | 0.03                                 |

W1

|                                              |                                              |                                              |                                      |                                      |
|----------------------------------------------|----------------------------------------------|----------------------------------------------|--------------------------------------|--------------------------------------|
| DO C <sub>0</sub>                            | DO C <sub>1</sub>                            | DO C <sub>2</sub>                            | DO flux 1                            | DO flux 2                            |
| 6.68                                         | 5.79                                         | 5.11                                         | -0.02                                | -0.01                                |
| 6.57                                         | 5.66                                         | 5.02                                         | -0.02                                | -0.01                                |
| 6.74                                         | 5.73                                         | 4.89                                         | -0.03                                | -0.01                                |
| NO <sub>3</sub> <sup>-</sup> C <sub>0</sub>  | NO <sub>3</sub> <sup>-</sup> C <sub>1</sub>  | NO <sub>3</sub> <sup>-</sup> C <sub>2</sub>  | NO <sub>3</sub> <sup>-</sup> flux 1  | NO <sub>3</sub> <sup>-</sup> flux 2  |
| 20.76 (0.04)                                 | 16.24 (0.05)                                 | 12.72 (0.04)                                 | -0.12                                | -0.04                                |
| 20.76 (0.04)                                 | 16.62 (0.03)                                 | 13.10 (0.04)                                 | -0.11                                | -0.04                                |
| 20.76 (0.04)                                 | 16.03 (0.03)                                 | 12.51 (0.03)                                 | -0.12                                | -0.04                                |
| NH <sub>4</sub> <sup>+</sup> C <sub>0</sub>  | NH <sub>4</sub> <sup>+</sup> C <sub>1</sub>  | NH <sub>4</sub> <sup>+</sup> C <sub>2</sub>  | NH <sub>4</sub> <sup>+</sup> flux 1  | NH <sub>4</sub> <sup>+</sup> flux 2  |
| 1.05 (0.03)                                  | 1.24 (0.02)                                  | 1.32 (0.03)                                  | 0.01                                 | 0.001                                |
| 1.05 (0.03)                                  | 1.26 (0.01)                                  | 1.34 (0.01)                                  | 0.01                                 | 0.001                                |
| 1.05 (0.03)                                  | 1.28 (0.01)                                  | 1.40 (0.01)                                  | 0.01                                 | 0.001                                |
| PO <sub>4</sub> <sup>3-</sup> C <sub>0</sub> | PO <sub>4</sub> <sup>3-</sup> C <sub>1</sub> | PO <sub>4</sub> <sup>3-</sup> C <sub>2</sub> | PO <sub>4</sub> <sup>3-</sup> flux 1 | PO <sub>4</sub> <sup>3-</sup> flux 2 |
| 1.17                                         | 0.97                                         | 1.09                                         | -0.005                               | 0.001                                |
| 1.17                                         | 0.92                                         | 1.03                                         | -0.005                               | 0.001                                |
| 1.17                                         | 0.93                                         | 1.05                                         | -0.005                               | 0.001                                |
| DOC C <sub>0</sub>                           | DOC C <sub>1</sub>                           | DOC C <sub>2</sub>                           | DOC flux 1                           | DOC flux 2                           |
| 7.52                                         | 11.66                                        | 14.30                                        | 0.11                                 | 0.03                                 |
| 7.52                                         | 11.55                                        | 14.18                                        | 0.11                                 | 0.03                                 |
| 7.52                                         | 11.63                                        | 14.34                                        | 0.12                                 | 0.03                                 |

W2

|                                             |                                             |                                             |                                     |                                     |
|---------------------------------------------|---------------------------------------------|---------------------------------------------|-------------------------------------|-------------------------------------|
| DO C <sub>0</sub>                           | DO C <sub>1</sub>                           | DO C <sub>2</sub>                           | DO flux 1                           | DO flux 2                           |
| 6.32                                        | 5.09                                        | 4.35                                        | -0.03                               | -0.01                               |
| 6.17                                        | 5.16                                        | 4.42                                        | -0.03                               | -0.01                               |
| 6.25                                        | 4.93                                        | 4.19                                        | -0.04                               | -0.01                               |
| NO <sub>3</sub> <sup>-</sup> C <sub>0</sub> | NO <sub>3</sub> <sup>-</sup> C <sub>1</sub> | NO <sub>3</sub> <sup>-</sup> C <sub>2</sub> | NO <sub>3</sub> <sup>-</sup> flux 1 | NO <sub>3</sub> <sup>-</sup> flux 2 |
| 22.03 (0.06)                                | 14.49 (0.08)                                | 6.58 (0.05)                                 | -0.20                               | -0.09                               |
| 22.03 (0.06)                                | 14.12 (0.07)                                | 6.21 (0.04)                                 | -0.21                               | -0.09                               |

|                                              |                                              |                                              |                                      |                                      |
|----------------------------------------------|----------------------------------------------|----------------------------------------------|--------------------------------------|--------------------------------------|
| 22.03 (0.06)                                 | 14.66 (0.08)                                 | 5.87 (0.04)                                  | -0.20                                | -0.10                                |
| NH <sub>4</sub> <sup>+</sup> C <sub>0</sub>  | NH <sub>4</sub> <sup>+</sup> C <sub>1</sub>  | NH <sub>4</sub> <sup>+</sup> C <sub>2</sub>  | NH <sub>4</sub> <sup>+</sup> flux 1  | NH <sub>4</sub> <sup>+</sup> flux 2  |
| 1.15 (0.05)                                  | 1.37 (0.04)                                  | 1.51 (0.03)                                  | 0.02                                 | 0.002                                |
| 1.15 (0.05)                                  | 1.41 (0.02)                                  | 1.55 (0.02)                                  | 0.02                                 | 0.002                                |
| 1.15 (0.05)                                  | 1.42 (0.02)                                  | 1.58 (0.02)                                  | 0.02                                 | 0.002                                |
| PO <sub>4</sub> <sup>3-</sup> C <sub>0</sub> | PO <sub>4</sub> <sup>3-</sup> C <sub>1</sub> | PO <sub>4</sub> <sup>3-</sup> C <sub>2</sub> | PO <sub>4</sub> <sup>3-</sup> flux 1 | PO <sub>4</sub> <sup>3-</sup> flux 2 |
| 1.26                                         | 1.01                                         | 0.96                                         | -0.007                               | -0.001                               |
| 1.26                                         | 0.99                                         | 0.92                                         | -0.007                               | -0.001                               |
| 1.26                                         | 0.98                                         | 0.82                                         | -0.007                               | -0.002                               |
| DOC C <sub>0</sub>                           | DOC C <sub>1</sub>                           | DOC C <sub>2</sub>                           | DOC flux 1                           | DOC flux 2                           |
| 8.47                                         | 8.09                                         | 7.65                                         | -0.01                                | -0.005                               |
| 8.47                                         | 8.02                                         | 7.58                                         | -0.01                                | -0.005                               |
| 8.47                                         | 7.73                                         | 7.28                                         | -0.02                                | -0.005                               |

Winter flux

L1

|                                              |                                              |                                              |                                      |                                      |
|----------------------------------------------|----------------------------------------------|----------------------------------------------|--------------------------------------|--------------------------------------|
| DO C <sub>0</sub>                            | DO C <sub>1</sub>                            | DO C <sub>2</sub>                            | DO flux 1                            | DO flux 2                            |
| 5.11                                         | 3.89                                         | 3.14                                         | -0.03                                | -0.01                                |
| 5.25                                         | 3.96                                         | 3.12                                         | -0.03                                | -0.01                                |
| 4.94                                         | 3.83                                         | 2.94                                         | -0.03                                | -0.01                                |
| NO <sub>3</sub> <sup>-</sup> C <sub>0</sub>  | NO <sub>3</sub> <sup>-</sup> C <sub>1</sub>  | NO <sub>3</sub> <sup>-</sup> C <sub>2</sub>  | NO <sub>3</sub> <sup>-</sup> flux 1  | NO <sub>3</sub> <sup>-</sup> flux 2  |
| 44.31 (0.11)                                 | 44.97 (0.10)                                 | 35.21 (0.12)                                 | 0.02                                 | -0.11                                |
| 44.31 (0.11)                                 | 45.39 (0.11)                                 | 35.53 (0.10)                                 | 0.03                                 | -0.11                                |
| 44.31 (0.11)                                 | 45.25 (0.08)                                 | 35.69 (0.10)                                 | 0.02                                 | -0.11                                |
| NH <sub>4</sub> <sup>+</sup> C <sub>0</sub>  | NH <sub>4</sub> <sup>+</sup> C <sub>1</sub>  | NH <sub>4</sub> <sup>+</sup> C <sub>2</sub>  | NH <sub>4</sub> <sup>+</sup> flux 1  | NH <sub>4</sub> <sup>+</sup> flux 2  |
| 1.18 (0.03)                                  | 2.31 (0.02)                                  | 3.19 (0.02)                                  | 0.03                                 | 0.01                                 |
| 1.18 (0.03)                                  | 2.27 (0.03)                                  | 3.15 (0.02)                                  | 0.03                                 | 0.01                                 |
| 1.18 (0.03)                                  | 2.45 (0.02)                                  | 3.12 (0.01)                                  | 0.03                                 | 0.01                                 |
| PO <sub>4</sub> <sup>3-</sup> C <sub>0</sub> | PO <sub>4</sub> <sup>3-</sup> C <sub>1</sub> | PO <sub>4</sub> <sup>3-</sup> C <sub>2</sub> | PO <sub>4</sub> <sup>3-</sup> flux 1 | PO <sub>4</sub> <sup>3-</sup> flux 2 |
| 1.27                                         | 0.89                                         | 0.71                                         | -0.01                                | -0.002                               |
| 1.27                                         | 0.91                                         | 0.72                                         | -0.01                                | -0.002                               |
| 1.27                                         | 0.87                                         | 0.63                                         | -0.01                                | -0.003                               |
| DOC C <sub>0</sub>                           | DOC C <sub>1</sub>                           | DOC C <sub>2</sub>                           | DOC flux 1                           | DOC flux 2                           |
| 13.63                                        | 14.76                                        | 14.41                                        | 0.03                                 | -0.004                               |
| 13.63                                        | 14.92                                        | 14.57                                        | 0.03                                 | -0.004                               |
| 13.63                                        | 14.82                                        | 14.47                                        | 0.03                                 | -0.004                               |

L2

|                                              |                                              |                                              |                                      |                                      |
|----------------------------------------------|----------------------------------------------|----------------------------------------------|--------------------------------------|--------------------------------------|
| DO C <sub>0</sub>                            | DO C <sub>1</sub>                            | DO C <sub>2</sub>                            | DO flux 1                            | DO flux 2                            |
| 5.42                                         | 3.63                                         | 3.01                                         | -0.05                                | -0.01                                |
| 5.23                                         | 3.46                                         | 2.92                                         | -0.05                                | -0.01                                |
| 5.31                                         | 3.49                                         | 2.83                                         | -0.05                                | -0.01                                |
| NO <sub>3</sub> <sup>-</sup> C <sub>0</sub>  | NO <sub>3</sub> <sup>-</sup> C <sub>1</sub>  | NO <sub>3</sub> <sup>-</sup> C <sub>2</sub>  | NO <sub>3</sub> <sup>-</sup> flux 1  | NO <sub>3</sub> <sup>-</sup> flux 2  |
| 51.87 (0.09)                                 | 40.08 (0.08)                                 | 36.68 (0.06)                                 | -0.31                                | -0.04                                |
| 51.87 (0.09)                                 | 40.44 (0.06)                                 | 36.97 (0.06)                                 | -0.30                                | -0.04                                |
| 51.87 (0.09)                                 | 40.21 (0.07)                                 | 36.77 (0.08)                                 | -0.31                                | -0.04                                |
| NH <sub>4</sub> <sup>+</sup> C <sub>0</sub>  | NH <sub>4</sub> <sup>+</sup> C <sub>1</sub>  | NH <sub>4</sub> <sup>+</sup> C <sub>2</sub>  | NH <sub>4</sub> <sup>+</sup> flux 1  | NH <sub>4</sub> <sup>+</sup> flux 2  |
| 0.93 (0.02)                                  | 2.44 (0.03)                                  | 3.32 (0.02)                                  | 0.04                                 | 0.01                                 |
| 0.93 (0.02)                                  | 2.26 (0.04)                                  | 3.05 (0.02)                                  | 0.04                                 | 0.01                                 |
| 0.93 (0.02)                                  | 2.35 (0.03)                                  | 3.18 (0.03)                                  | 0.04                                 | 0.01                                 |
| PO <sub>4</sub> <sup>3-</sup> C <sub>0</sub> | PO <sub>4</sub> <sup>3-</sup> C <sub>1</sub> | PO <sub>4</sub> <sup>3-</sup> C <sub>2</sub> | PO <sub>4</sub> <sup>3-</sup> flux 1 | PO <sub>4</sub> <sup>3-</sup> flux 2 |
| 1.13                                         | 0.85                                         | 0.67                                         | -0.007                               | -0.002                               |
| 1.13                                         | 0.83                                         | 0.66                                         | -0.007                               | -0.002                               |
| 1.13                                         | 0.87                                         | 0.69                                         | -0.007                               | -0.002                               |
| DOC C <sub>0</sub>                           | DOC C <sub>1</sub>                           | DOC C <sub>2</sub>                           | DOC flux 1                           | DOC flux 2                           |
| 10.84                                        | 12.25                                        | 12.69                                        | 0.04                                 | 0.005                                |
| 10.84                                        | 12.23                                        | 12.90                                        | 0.04                                 | 0.004                                |
| 10.84                                        | 12.27                                        | 12.58                                        | 0.04                                 | 0.005                                |

T1

|                   |                   |                   |           |           |
|-------------------|-------------------|-------------------|-----------|-----------|
| DO C <sub>0</sub> | DO C <sub>1</sub> | DO C <sub>2</sub> | DO flux 1 | DO flux 2 |
| 5.68              | 4.69              | 4.02              | -0.03     | -0.01     |

|                                              |                                              |                                              |                                      |                                      |
|----------------------------------------------|----------------------------------------------|----------------------------------------------|--------------------------------------|--------------------------------------|
| 5.77                                         | 4.73                                         | 4.14                                         | -0.03                                | -0.01                                |
| 5.61                                         | 4.62                                         | 3.91                                         | -0.03                                | -0.01                                |
| NO <sub>3</sub> <sup>-</sup> C <sub>0</sub>  | NO <sub>3</sub> <sup>-</sup> C <sub>1</sub>  | NO <sub>3</sub> <sup>-</sup> C <sub>2</sub>  | NO <sub>3</sub> <sup>-</sup> flux 1  | NO <sub>3</sub> <sup>-</sup> flux 2  |
| 33.99 (0.07)                                 | 45.63 (0.05)                                 | 36.41 (0.07)                                 | 0.31                                 | -0.10                                |
| 33.99 (0.07)                                 | 45.48 (0.06)                                 | 36.11 (0.04)                                 | 0.30                                 | -0.11                                |
| 33.99 (0.07)                                 | 45.32 (0.06)                                 | 36.28 (0.07)                                 | 0.30                                 | -0.10                                |
| NH <sub>4</sub> <sup>+</sup> C <sub>0</sub>  | NH <sub>4</sub> <sup>+</sup> C <sub>1</sub>  | NH <sub>4</sub> <sup>+</sup> C <sub>2</sub>  | NH <sub>4</sub> <sup>+</sup> flux 1  | NH <sub>4</sub> <sup>+</sup> flux 2  |
| 0.85 (0.02)                                  | 1.98 (0.03)                                  | 2.86 (0.02)                                  | 0.03                                 | 0.01                                 |
| 0.85 (0.02)                                  | 1.93 (0.02)                                  | 2.81 (0.01)                                  | 0.03                                 | 0.01                                 |
| 0.85 (0.02)                                  | 2.26 (0.03)                                  | 3.03 (0.02)                                  | 0.04                                 | 0.01                                 |
| PO <sub>4</sub> <sup>3-</sup> C <sub>0</sub> | PO <sub>4</sub> <sup>3-</sup> C <sub>1</sub> | PO <sub>4</sub> <sup>3-</sup> C <sub>2</sub> | PO <sub>4</sub> <sup>3-</sup> flux 1 | PO <sub>4</sub> <sup>3-</sup> flux 2 |
| 0.93                                         | 0.81                                         | 0.88                                         | -0.003                               | 0.001                                |
| 0.93                                         | 0.77                                         | 0.86                                         | -0.004                               | 0.001                                |
| 0.93                                         | 0.82                                         | 0.95                                         | -0.003                               | 0.001                                |
| DOC C <sub>0</sub>                           | DOC C <sub>1</sub>                           | DOC C <sub>2</sub>                           | DOC flux 1                           | DOC flux 2                           |
| 13.53                                        | 13.91                                        | 13.65                                        | 0.01                                 | -0.003                               |
| 13.53                                        | 13.85                                        | 13.61                                        | 0.01                                 | -0.003                               |
| 13.53                                        | 13.98                                        | 14.16                                        | 0.01                                 | -0.002                               |

T2

|                                              |                                              |                                              |                                      |                                      |
|----------------------------------------------|----------------------------------------------|----------------------------------------------|--------------------------------------|--------------------------------------|
| DO C <sub>0</sub>                            | DO C <sub>1</sub>                            | DO C <sub>2</sub>                            | DO flux 1                            | DO flux 2                            |
| 6.32                                         | 5.44                                         | 4.96                                         | -0.02                                | -0.01                                |
| 6.22                                         | 5.36                                         | 4.83                                         | -0.02                                | -0.01                                |
| 6.24                                         | 5.38                                         | 4.92                                         | -0.02                                | -0.01                                |
| NO <sub>3</sub> <sup>-</sup> C <sub>0</sub>  | NO <sub>3</sub> <sup>-</sup> C <sub>1</sub>  | NO <sub>3</sub> <sup>-</sup> C <sub>2</sub>  | NO <sub>3</sub> <sup>-</sup> flux 1  | NO <sub>3</sub> <sup>-</sup> flux 2  |
| 36.21 (0.10)                                 | 34.01 (0.07)                                 | 38.82 (0.06)                                 | -0.06                                | 0.05                                 |
| 36.21 (0.10)                                 | 33.88 (0.06)                                 | 38.60 (0.05)                                 | -0.06                                | 0.05                                 |
| 36.21 (0.10)                                 | 34.12 (0.04)                                 | 38.74 (0.05)                                 | -0.06                                | 0.05                                 |
| NH <sub>4</sub> <sup>+</sup> C <sub>0</sub>  | NH <sub>4</sub> <sup>+</sup> C <sub>1</sub>  | NH <sub>4</sub> <sup>+</sup> C <sub>2</sub>  | NH <sub>4</sub> <sup>+</sup> flux 1  | NH <sub>4</sub> <sup>+</sup> flux 2  |
| 0.62 (0.03)                                  | 1.37 (0.02)                                  | 1.81 (0.03)                                  | 0.02                                 | 0.005                                |
| 0.62 (0.03)                                  | 1.45 (0.02)                                  | 1.88 (0.02)                                  | 0.02                                 | 0.005                                |
| 0.62 (0.03)                                  | 1.41 (0.01)                                  | 1.85 (0.02)                                  | 0.02                                 | 0.005                                |
| PO <sub>4</sub> <sup>3-</sup> C <sub>0</sub> | PO <sub>4</sub> <sup>3-</sup> C <sub>1</sub> | PO <sub>4</sub> <sup>3-</sup> C <sub>2</sub> | PO <sub>4</sub> <sup>3-</sup> flux 1 | PO <sub>4</sub> <sup>3-</sup> flux 2 |
| 1.02                                         | 0.87                                         | 0.69                                         | -0.004                               | -0.002                               |
| 1.02                                         | 0.88                                         | 0.71                                         | -0.004                               | -0.002                               |
| 1.02                                         | 0.86                                         | 0.60                                         | -0.004                               | -0.003                               |
| DOC C <sub>0</sub>                           | DOC C <sub>1</sub>                           | DOC C <sub>2</sub>                           | DOC flux 1                           | DOC flux 2                           |
| 11.37                                        | 12.12                                        | 11.86                                        | 0.02                                 | -0.003                               |
| 11.37                                        | 12.23                                        | 11.96                                        | 0.02                                 | -0.003                               |
| 11.37                                        | 12.39                                        | 12.04                                        | 0.03                                 | -0.004                               |

W1

|                                              |                                              |                                              |                                      |                                      |
|----------------------------------------------|----------------------------------------------|----------------------------------------------|--------------------------------------|--------------------------------------|
| DO C <sub>0</sub>                            | DO C <sub>1</sub>                            | DO C <sub>2</sub>                            | DO flux 1                            | DO flux 2                            |
| 6.64                                         | 5.57                                         | 5.02                                         | -0.03                                | -0.01                                |
| 6.62                                         | 5.44                                         | 4.76                                         | -0.03                                | -0.01                                |
| 6.54                                         | 5.51                                         | 4.87                                         | -0.03                                | -0.01                                |
| NO <sub>3</sub> <sup>-</sup> C <sub>0</sub>  | NO <sub>3</sub> <sup>-</sup> C <sub>1</sub>  | NO <sub>3</sub> <sup>-</sup> C <sub>2</sub>  | NO <sub>3</sub> <sup>-</sup> flux 1  | NO <sub>3</sub> <sup>-</sup> flux 2  |
| 36.50 (0.07)                                 | 38.79 (0.05)                                 | 42.31 (0.07)                                 | 0.06                                 | 0.04                                 |
| 36.50 (0.07)                                 | 39.03 (0.06)                                 | 41.66 (0.04)                                 | 0.07                                 | 0.03                                 |
| 36.50 (0.07)                                 | 38.88 (0.04)                                 | 41.52 (0.03)                                 | 0.06                                 | 0.03                                 |
| NH <sub>4</sub> <sup>+</sup> C <sub>0</sub>  | NH <sub>4</sub> <sup>+</sup> C <sub>1</sub>  | NH <sub>4</sub> <sup>+</sup> C <sub>2</sub>  | NH <sub>4</sub> <sup>+</sup> flux 1  | NH <sub>4</sub> <sup>+</sup> flux 2  |
| 0.52 (0.01)                                  | 2.40 (0.02)                                  | 3.25 (0.01)                                  | 0.05                                 | 0.01                                 |
| 0.52 (0.01)                                  | 2.02 (0.01)                                  | 2.83 (0.02)                                  | 0.04                                 | 0.01                                 |
| 0.52 (0.01)                                  | 2.24 (0.02)                                  | 3.11 (0.02)                                  | 0.05                                 | 0.01                                 |
| PO <sub>4</sub> <sup>3-</sup> C <sub>0</sub> | PO <sub>4</sub> <sup>3-</sup> C <sub>1</sub> | PO <sub>4</sub> <sup>3-</sup> C <sub>2</sub> | PO <sub>4</sub> <sup>3-</sup> flux 1 | PO <sub>4</sub> <sup>3-</sup> flux 2 |
| 1.21                                         | 0.91                                         | 0.75                                         | -0.008                               | -0.002                               |
| 1.21                                         | 0.89                                         | 0.73                                         | -0.008                               | -0.002                               |
| 1.21                                         | 0.87                                         | 0.63                                         | -0.009                               | -0.003                               |
| DOC C <sub>0</sub>                           | DOC C <sub>1</sub>                           | DOC C <sub>2</sub>                           | DOC flux 1                           | DOC flux 2                           |
| 10.67                                        | 10.29                                        | 10.11                                        | -0.01                                | -0.002                               |
| 10.67                                        | 10.17                                        | 9.91                                         | -0.01                                | -0.003                               |

|       |       |      |       |        |
|-------|-------|------|-------|--------|
| 10.67 | 10.22 | 9.96 | -0.01 | -0.003 |
|-------|-------|------|-------|--------|

W2

| DO C <sub>0</sub>                            | DO C <sub>1</sub>                            | DO C <sub>2</sub>                            | DO flux 1                            | DO flux 2                            |
|----------------------------------------------|----------------------------------------------|----------------------------------------------|--------------------------------------|--------------------------------------|
| 6.13                                         | 5.29                                         | 4.66                                         | -0.02                                | -0.01                                |
| 6.02                                         | 5.24                                         | 4.53                                         | -0.02                                | -0.01                                |
| 5.96                                         | 5.18                                         | 4.62                                         | -0.02                                | -0.01                                |
| NO <sub>3</sub> <sup>-</sup> C <sub>0</sub>  | NO <sub>3</sub> <sup>-</sup> C <sub>1</sub>  | NO <sub>3</sub> <sup>-</sup> C <sub>2</sub>  | NO <sub>3</sub> <sup>-</sup> flux 1  | NO <sub>3</sub> <sup>-</sup> flux 2  |
| 45.01 (0.08)                                 | 41.62 (0.09)                                 | 38.96 (0.07)                                 | -0.09                                | -0.03                                |
| 45.01 (0.08)                                 | 42.02 (0.06)                                 | 39.43 (0.08)                                 | -0.08                                | -0.03                                |
| 45.01 (0.08)                                 | 41.88 (0.06)                                 | 39.25 (0.08)                                 | -0.08                                | -0.03                                |
| NH <sub>4</sub> <sup>+</sup> C <sub>0</sub>  | NH <sub>4</sub> <sup>+</sup> C <sub>1</sub>  | NH <sub>4</sub> <sup>+</sup> C <sub>2</sub>  | NH <sub>4</sub> <sup>+</sup> flux 1  | NH <sub>4</sub> <sup>+</sup> flux 2  |
| 0.56 (0.02)                                  | 2.10 (0.03)                                  | 2.88 (0.04)                                  | 0.04                                 | 0.01                                 |
| 0.56 (0.02)                                  | 1.95 (0.02)                                  | 2.71 (0.02)                                  | 0.04                                 | 0.01                                 |
| 0.56 (0.02)                                  | 2.27 (0.02)                                  | 3.13 (0.02)                                  | 0.05                                 | 0.01                                 |
| PO <sub>4</sub> <sup>3-</sup> C <sub>0</sub> | PO <sub>4</sub> <sup>3-</sup> C <sub>1</sub> | PO <sub>4</sub> <sup>3-</sup> C <sub>2</sub> | PO <sub>4</sub> <sup>3-</sup> flux 1 | PO <sub>4</sub> <sup>3-</sup> flux 2 |
| 1.30                                         | 0.96                                         | 0.78                                         | -0.009                               | -0.002                               |
| 1.30                                         | 0.89                                         | 0.63                                         | -0.011                               | -0.003                               |
| 1.30                                         | 0.92                                         | 0.66                                         | -0.010                               | -0.003                               |
| DOC C <sub>0</sub>                           | DOC C <sub>1</sub>                           | DOC C <sub>2</sub>                           | DOC flux 1                           | DOC flux 2                           |
| 11.22                                        | 9.71                                         | 8.83                                         | -0.04                                | -0.010                               |
| 11.22                                        | 9.78                                         | 8.87                                         | -0.04                                | -0.010                               |
| 11.22                                        | 9.69                                         | 8.90                                         | -0.04                                | -0.009                               |

Spring flux

L1

| DO C <sub>0</sub>                            | DO C <sub>1</sub>                            | DO C <sub>2</sub>                            | DO flux 1                            | DO flux 2                            |
|----------------------------------------------|----------------------------------------------|----------------------------------------------|--------------------------------------|--------------------------------------|
| 5.82                                         | 5.18                                         | 4.66                                         | -0.02                                | -0.01                                |
| 5.72                                         | 5.12                                         | 4.63                                         | -0.02                                | -0.01                                |
| 5.77                                         | 5.16                                         | 4.52                                         | -0.02                                | -0.01                                |
| NO <sub>3</sub> <sup>-</sup> C <sub>0</sub>  | NO <sub>3</sub> <sup>-</sup> C <sub>1</sub>  | NO <sub>3</sub> <sup>-</sup> C <sub>2</sub>  | NO <sub>3</sub> <sup>-</sup> flux 1  | NO <sub>3</sub> <sup>-</sup> flux 2  |
| 33.12 (0.07)                                 | 40.92 (0.10)                                 | 33.52 (0.11)                                 | 0.21                                 | -0.08                                |
| 33.12 (0.07)                                 | 41.13 (0.08)                                 | 33.44 (0.09)                                 | 0.21                                 | -0.09                                |
| 33.12 (0.07)                                 | 40.81 (0.08)                                 | 33.65 (0.08)                                 | 0.20                                 | -0.08                                |
| NH <sub>4</sub> <sup>+</sup> C <sub>0</sub>  | NH <sub>4</sub> <sup>+</sup> C <sub>1</sub>  | NH <sub>4</sub> <sup>+</sup> C <sub>2</sub>  | NH <sub>4</sub> <sup>+</sup> flux 1  | NH <sub>4</sub> <sup>+</sup> flux 2  |
| 2.17 (0.05)                                  | 2.21 (0.04)                                  | 1.94 (0.04)                                  | 0.001                                | -0.003                               |
| 2.17 (0.05)                                  | 2.24 (0.05)                                  | 1.88 (0.03)                                  | 0.002                                | -0.004                               |
| 2.17 (0.05)                                  | 2.26 (0.04)                                  | 1.92 (0.03)                                  | 0.002                                | -0.004                               |
| PO <sub>4</sub> <sup>3-</sup> C <sub>0</sub> | PO <sub>4</sub> <sup>3-</sup> C <sub>1</sub> | PO <sub>4</sub> <sup>3-</sup> C <sub>2</sub> | PO <sub>4</sub> <sup>3-</sup> flux 1 | PO <sub>4</sub> <sup>3-</sup> flux 2 |
| 0.82                                         | 1.05                                         | 1.23                                         | 0.006                                | 0.002                                |
| 0.82                                         | 1.07                                         | 1.24                                         | 0.006                                | 0.002                                |
| 0.82                                         | 1.04                                         | 1.24                                         | 0.006                                | 0.002                                |
| DOC C <sub>0</sub>                           | DOC C <sub>1</sub>                           | DOC C <sub>2</sub>                           | DOC flux 1                           | DOC flux 2                           |
| 7.00                                         | 9.64                                         | 9.90                                         | 0.07                                 | 0.003                                |
| 7.00                                         | 9.73                                         | 9.99                                         | 0.07                                 | 0.003                                |
| 7.00                                         | 9.79                                         | 10.07                                        | 0.07                                 | 0.003                                |

L2:

| DO C <sub>0</sub>                            | DO C <sub>1</sub>                            | DO C <sub>2</sub>                            | DO flux 1                            | DO flux 2                            |
|----------------------------------------------|----------------------------------------------|----------------------------------------------|--------------------------------------|--------------------------------------|
| 6.29                                         | 5.35                                         | 4.68                                         | -0.02                                | -0.01                                |
| 6.41                                         | 5.42                                         | 4.83                                         | -0.03                                | -0.01                                |
| 6.35                                         | 5.33                                         | 4.62                                         | -0.03                                | -0.01                                |
| NO <sub>3</sub> <sup>-</sup> C <sub>0</sub>  | NO <sub>3</sub> <sup>-</sup> C <sub>1</sub>  | NO <sub>3</sub> <sup>-</sup> C <sub>2</sub>  | NO <sub>3</sub> <sup>-</sup> flux 1  | NO <sub>3</sub> <sup>-</sup> flux 2  |
| 31.48 (0.08)                                 | 28.26 (0.10)                                 | 32.22 (0.08)                                 | -0.09                                | 0.05                                 |
| 31.48 (0.08)                                 | 28.11 (0.12)                                 | 32.35 (0.08)                                 | -0.09                                | 0.05                                 |
| 31.48 (0.08)                                 | 28.03 (0.09)                                 | 32.15 (0.07)                                 | -0.09                                | 0.05                                 |
| NH <sub>4</sub> <sup>+</sup> C <sub>0</sub>  | NH <sub>4</sub> <sup>+</sup> C <sub>1</sub>  | NH <sub>4</sub> <sup>+</sup> C <sub>2</sub>  | NH <sub>4</sub> <sup>+</sup> flux 1  | NH <sub>4</sub> <sup>+</sup> flux 2  |
| 1.73 (0.06)                                  | 2.02 (0.08)                                  | 1.78 (0.07)                                  | 0.01                                 | -0.003                               |
| 1.73 (0.06)                                  | 2.11 (0.05)                                  | 1.69 (0.08)                                  | 0.01                                 | -0.005                               |
| 1.73 (0.06)                                  | 2.08 (0.06)                                  | 1.72 (0.06)                                  | 0.01                                 | -0.004                               |
| PO <sub>4</sub> <sup>3-</sup> C <sub>0</sub> | PO <sub>4</sub> <sup>3-</sup> C <sub>1</sub> | PO <sub>4</sub> <sup>3-</sup> C <sub>2</sub> | PO <sub>4</sub> <sup>3-</sup> flux 1 | PO <sub>4</sub> <sup>3-</sup> flux 2 |
| 0.57                                         | 0.85                                         | 1.11                                         | 0.007                                | 0.003                                |

|                    |                    |                    |            |            |
|--------------------|--------------------|--------------------|------------|------------|
| 0.57               | 0.83               | 1.06               | 0.007      | 0.003      |
| 0.57               | 0.88               | 1.13               | 0.007      | 0.003      |
| DOC C <sub>0</sub> | DOC C <sub>1</sub> | DOC C <sub>2</sub> | DOC flux 1 | DOC flux 2 |
| 6.40               | 8.28               | 8.45               | 0.05       | 0.002      |
| 6.40               | 8.37               | 8.63               | 0.05       | 0.003      |
| 6.40               | 8.44               | 8.62               | 0.05       | 0.002      |

T1:

|                                              |                                              |                                              |                                      |                                      |
|----------------------------------------------|----------------------------------------------|----------------------------------------------|--------------------------------------|--------------------------------------|
| DO C <sub>0</sub>                            | DO C <sub>1</sub>                            | DO C <sub>2</sub>                            | DO flux 1                            | DO flux 2                            |
| 6.44                                         | 5.53                                         | 4.96                                         | -0.02                                | -0.01                                |
| 6.53                                         | 5.72                                         | 5.15                                         | -0.02                                | -0.01                                |
| 6.49                                         | 5.66                                         | 5.03                                         | -0.02                                | -0.01                                |
| NO <sub>3</sub> <sup>-</sup> C <sub>0</sub>  | NO <sub>3</sub> <sup>-</sup> C <sub>1</sub>  | NO <sub>3</sub> <sup>-</sup> C <sub>2</sub>  | NO <sub>3</sub> <sup>-</sup> flux 1  | NO <sub>3</sub> <sup>-</sup> flux 2  |
| 29.27 (0.06)                                 | 26.26 (0.09)                                 | 24.57 (0.06)                                 | -0.08                                | -0.02                                |
| 29.27 (0.06)                                 | 26.08 (0.07)                                 | 24.43 (0.05)                                 | -0.08                                | -0.02                                |
| 29.27 (0.06)                                 | 26.15 (0.07)                                 | 24.51 (0.06)                                 | -0.08                                | -0.02                                |
| NH <sub>4</sub> <sup>+</sup> C <sub>0</sub>  | NH <sub>4</sub> <sup>+</sup> C <sub>1</sub>  | NH <sub>4</sub> <sup>+</sup> C <sub>2</sub>  | NH <sub>4</sub> <sup>+</sup> flux 1  | NH <sub>4</sub> <sup>+</sup> flux 2  |
| 1.67 (0.03)                                  | 1.29 (0.05)                                  | 1.13 (0.03)                                  | -0.01                                | -0.002                               |
| 1.67 (0.03)                                  | 1.34 (0.06)                                  | 1.11 (0.04)                                  | -0.01                                | -0.002                               |
| 1.67 (0.03)                                  | 1.38 (0.05)                                  | 1.18 (0.03)                                  | -0.01                                | -0.002                               |
| PO <sub>4</sub> <sup>3-</sup> C <sub>0</sub> | PO <sub>4</sub> <sup>3-</sup> C <sub>1</sub> | PO <sub>4</sub> <sup>3-</sup> C <sub>2</sub> | PO <sub>4</sub> <sup>3-</sup> flux 1 | PO <sub>4</sub> <sup>3-</sup> flux 2 |
| 0.36                                         | 0.29                                         | 0.23                                         | -0.002                               | -0.001                               |
| 0.36                                         | 0.26                                         | 0.21                                         | -0.003                               | -0.001                               |
| 0.36                                         | 0.27                                         | 0.21                                         | -0.002                               | -0.001                               |
| DOC C <sub>0</sub>                           | DOC C <sub>1</sub>                           | DOC C <sub>2</sub>                           | DOC flux 1                           | DOC flux 2                           |
| 6.00                                         | 10.52                                        | 12.29                                        | 0.12                                 | 0.02                                 |
| 6.00                                         | 10.43                                        | 12.13                                        | 0.12                                 | 0.02                                 |
| 6.00                                         | 10.48                                        | 12.22                                        | 0.12                                 | 0.02                                 |

T2

|                                              |                                              |                                              |                                      |                                      |
|----------------------------------------------|----------------------------------------------|----------------------------------------------|--------------------------------------|--------------------------------------|
| DO C <sub>0</sub>                            | DO C <sub>1</sub>                            | DO C <sub>2</sub>                            | DO flux 1                            | DO flux 2                            |
| 6.74                                         | 5.88                                         | 5.24                                         | -0.02                                | -0.01                                |
| 6.65                                         | 5.96                                         | 5.34                                         | -0.02                                | -0.01                                |
| 6.61                                         | 5.78                                         | 5.15                                         | -0.02                                | -0.01                                |
| NO <sub>3</sub> <sup>-</sup> C <sub>0</sub>  | NO <sub>3</sub> <sup>-</sup> C <sub>1</sub>  | NO <sub>3</sub> <sup>-</sup> C <sub>2</sub>  | NO <sub>3</sub> <sup>-</sup> flux 1  | NO <sub>3</sub> <sup>-</sup> flux 2  |
| 41.33 (0.05)                                 | 33.73 (0.08)                                 | 30.14 (0.05)                                 | -0.20                                | -0.04                                |
| 41.33 (0.05)                                 | 34.25 (0.10)                                 | 30.38 (0.07)                                 | -0.19                                | -0.04                                |
| 41.33 (0.05)                                 | 33.96 (0.06)                                 | 29.86 (0.06)                                 | -0.20                                | -0.05                                |
| NH <sub>4</sub> <sup>+</sup> C <sub>0</sub>  | NH <sub>4</sub> <sup>+</sup> C <sub>1</sub>  | NH <sub>4</sub> <sup>+</sup> C <sub>2</sub>  | NH <sub>4</sub> <sup>+</sup> flux 1  | NH <sub>4</sub> <sup>+</sup> flux 2  |
| 1.93 (0.04)                                  | 2.08 (0.06)                                  | 1.99 (0.05)                                  | 0.004                                | -0.001                               |
| 1.93 (0.04)                                  | 2.06 (0.05)                                  | 1.95 (0.04)                                  | 0.004                                | -0.001                               |
| 1.93 (0.04)                                  | 2.11 (0.06)                                  | 1.93 (0.04)                                  | 0.005                                | -0.002                               |
| PO <sub>4</sub> <sup>3-</sup> C <sub>0</sub> | PO <sub>4</sub> <sup>3-</sup> C <sub>1</sub> | PO <sub>4</sub> <sup>3-</sup> C <sub>2</sub> | PO <sub>4</sub> <sup>3-</sup> flux 1 | PO <sub>4</sub> <sup>3-</sup> flux 2 |
| 0.45                                         | 0.33                                         | 0.39                                         | -0.003                               | 0.001                                |
| 0.45                                         | 0.35                                         | 0.40                                         | -0.003                               | 0.001                                |
| 0.45                                         | 0.32                                         | 0.37                                         | -0.003                               | 0.001                                |
| DOC C <sub>0</sub>                           | DOC C <sub>1</sub>                           | DOC C <sub>2</sub>                           | DOC flux 1                           | DOC flux 2                           |
| 6.91                                         | 9.20                                         | 8.85                                         | 0.06                                 | -0.004                               |
| 6.91                                         | 9.17                                         | 8.82                                         | 0.06                                 | -0.004                               |
| 6.91                                         | 9.22                                         | 8.77                                         | 0.06                                 | -0.005                               |

W1

|                                             |                                             |                                             |                                     |                                     |
|---------------------------------------------|---------------------------------------------|---------------------------------------------|-------------------------------------|-------------------------------------|
| DO C <sub>0</sub>                           | DO C <sub>1</sub>                           | DO C <sub>2</sub>                           | DO flux 1                           | DO flux 2                           |
| 6.46                                        | 5.57                                        | 4.97                                        | -0.02                               | -0.01                               |
| 6.55                                        | 5.52                                        | 4.85                                        | -0.03                               | -0.01                               |
| 6.50                                        | 5.46                                        | 4.77                                        | -0.03                               | -0.01                               |
| NO <sub>3</sub> <sup>-</sup> C <sub>0</sub> | NO <sub>3</sub> <sup>-</sup> C <sub>1</sub> | NO <sub>3</sub> <sup>-</sup> C <sub>2</sub> | NO <sub>3</sub> <sup>-</sup> flux 1 | NO <sub>3</sub> <sup>-</sup> flux 2 |
| 23.94 (0.06)                                | 21.30 (0.10)                                | 19.54 (0.09)                                | -0.07                               | -0.02                               |
| 23.94 (0.06)                                | 21.42 (0.08)                                | 19.68 (0.08)                                | -0.07                               | -0.02                               |
| 23.94 (0.06)                                | 21.65 (0.07)                                | 19.89 (0.05)                                | -0.06                               | -0.02                               |
| NH <sub>4</sub> <sup>+</sup> C <sub>0</sub> | NH <sub>4</sub> <sup>+</sup> C <sub>1</sub> | NH <sub>4</sub> <sup>+</sup> C <sub>2</sub> | NH <sub>4</sub> <sup>+</sup> flux 1 | NH <sub>4</sub> <sup>+</sup> flux 2 |
| 2.19 (0.06)                                 | 2.08 (0.06)                                 | 1.88 (0.03)                                 | -0.003                              | -0.002                              |

|                                              |                                              |                                              |                                      |                                      |
|----------------------------------------------|----------------------------------------------|----------------------------------------------|--------------------------------------|--------------------------------------|
| 2.19 (0.06)                                  | 2.04 (0.05)                                  | 1.91 (0.04)                                  | -0.004                               | -0.001                               |
| 2.19 (0.06)                                  | 1.99 (0.05)                                  | 1.82 (0.03)                                  | -0.005                               | -0.002                               |
| PO <sub>4</sub> <sup>3-</sup> C <sub>0</sub> | PO <sub>4</sub> <sup>3-</sup> C <sub>1</sub> | PO <sub>4</sub> <sup>3-</sup> C <sub>2</sub> | PO <sub>4</sub> <sup>3-</sup> flux 1 | PO <sub>4</sub> <sup>3-</sup> flux 2 |
| 0.66                                         | 0.47                                         | 0.41                                         | -0.005                               | -0.001                               |
| 0.66                                         | 0.50                                         | 0.44                                         | -0.004                               | -0.001                               |
| 0.66                                         | 0.45                                         | 0.38                                         | -0.006                               | -0.001                               |
| DOC C <sub>0</sub>                           | DOC C <sub>1</sub>                           | DOC C <sub>2</sub>                           | DOC flux 1                           | DOC flux 2                           |
| 6.04                                         | 7.17                                         | 6.30                                         | 0.03                                 | -0.01                                |
| 6.04                                         | 7.19                                         | 6.33                                         | 0.03                                 | -0.01                                |
| 6.04                                         | 7.22                                         | 6.34                                         | 0.03                                 | -0.01                                |

W2

|                                              |                                              |                                              |                                      |                                      |
|----------------------------------------------|----------------------------------------------|----------------------------------------------|--------------------------------------|--------------------------------------|
| DO C <sub>0</sub>                            | DO C <sub>1</sub>                            | DO C <sub>2</sub>                            | DO flux 1                            | DO flux 2                            |
| 6.12                                         | 5.37                                         | 4.77                                         | -0.02                                | -0.01                                |
| 5.96                                         | 5.26                                         | 4.56                                         | -0.02                                | -0.01                                |
| 6.04                                         | 5.33                                         | 4.62                                         | -0.02                                | -0.01                                |
| NO <sub>3</sub> <sup>-</sup> C <sub>0</sub>  | NO <sub>3</sub> <sup>-</sup> C <sub>1</sub>  | NO <sub>3</sub> <sup>-</sup> C <sub>2</sub>  | NO <sub>3</sub> <sup>-</sup> flux 1  | NO <sub>3</sub> <sup>-</sup> flux 2  |
| 28.82 (0.04)                                 | 24.11 (0.07)                                 | 20.46 (0.05)                                 | -0.13                                | -0.04                                |
| 28.82 (0.04)                                 | 23.88 (0.09)                                 | 20.14 (0.06)                                 | -0.13                                | -0.04                                |
| 28.82 (0.04)                                 | 23.72 (0.06)                                 | 20.28 (0.03)                                 | -0.14                                | -0.04                                |
| NH <sub>4</sub> <sup>+</sup> C <sub>0</sub>  | NH <sub>4</sub> <sup>+</sup> C <sub>1</sub>  | NH <sub>4</sub> <sup>+</sup> C <sub>2</sub>  | NH <sub>4</sub> <sup>+</sup> flux 1  | NH <sub>4</sub> <sup>+</sup> flux 2  |
| 2.48 (0.03)                                  | 2.02 (0.04)                                  | 1.60 (0.03)                                  | -0.01                                | -0.005                               |
| 2.48 (0.03)                                  | 1.93 (0.03)                                  | 1.53 (0.02)                                  | -0.01                                | -0.005                               |
| 2.48 (0.03)                                  | 1.97 (0.03)                                  | 1.56 (0.03)                                  | -0.01                                | -0.005                               |
| PO <sub>4</sub> <sup>3-</sup> C <sub>0</sub> | PO <sub>4</sub> <sup>3-</sup> C <sub>1</sub> | PO <sub>4</sub> <sup>3-</sup> C <sub>2</sub> | PO <sub>4</sub> <sup>3-</sup> flux 1 | PO <sub>4</sub> <sup>3-</sup> flux 2 |
| 0.78                                         | 0.58                                         | 0.47                                         | -0.005                               | -0.001                               |
| 0.78                                         | 0.55                                         | 0.44                                         | -0.006                               | -0.001                               |
| 0.78                                         | 0.59                                         | 0.48                                         | -0.005                               | -0.001                               |
| DOC C <sub>0</sub>                           | DOC C <sub>1</sub>                           | DOC C <sub>2</sub>                           | DOC flux 1                           | DOC flux 2                           |
| 6.80                                         | 7.55                                         | 6.67                                         | 0.02                                 | -0.010                               |
| 6.80                                         | 7.58                                         | 6.71                                         | 0.02                                 | -0.010                               |
| 6.80                                         | 7.60                                         | 6.63                                         | 0.02                                 | -0.011                               |

Summer flux

L1

|                                              |                                              |                                              |                                      |                                      |
|----------------------------------------------|----------------------------------------------|----------------------------------------------|--------------------------------------|--------------------------------------|
| DO C <sub>0</sub>                            | DO C <sub>1</sub>                            | DO C <sub>2</sub>                            | DO flux 1                            | DO flux 2                            |
| 7.76                                         | 6.79                                         | 6.23                                         | -0.03                                | -0.01                                |
| 7.64                                         | 6.63                                         | 6.16                                         | -0.03                                | -0.01                                |
| 7.55                                         | 6.67                                         | 6.25                                         | -0.02                                | -0.01                                |
| NO <sub>3</sub> <sup>-</sup> C <sub>0</sub>  | NO <sub>3</sub> <sup>-</sup> C <sub>1</sub>  | NO <sub>3</sub> <sup>-</sup> C <sub>2</sub>  | NO <sub>3</sub> <sup>-</sup> flux 1  | NO <sub>3</sub> <sup>-</sup> flux 2  |
| 23.37 (0.06)                                 | 22.27 (0.05)                                 | 23.53 (0.04)                                 | -0.03                                | 0.01                                 |
| 23.37 (0.06)                                 | 22.06 (0.04)                                 | 23.42 (0.03)                                 | -0.03                                | 0.02                                 |
| 23.37 (0.06)                                 | 22.14 (0.04)                                 | 23.48 (0.03)                                 | -0.03                                | 0.02                                 |
| NH <sub>4</sub> <sup>+</sup> C <sub>0</sub>  | NH <sub>4</sub> <sup>+</sup> C <sub>1</sub>  | NH <sub>4</sub> <sup>+</sup> C <sub>2</sub>  | NH <sub>4</sub> <sup>+</sup> flux 1  | NH <sub>4</sub> <sup>+</sup> flux 2  |
| 3.30 (0.01)                                  | 4.60 (0.02)                                  | 4.50 (0.03)                                  | 0.03                                 | -0.001                               |
| 3.30 (0.01)                                  | 4.66 (0.02)                                  | 4.55 (0.02)                                  | 0.04                                 | -0.001                               |
| 3.30 (0.01)                                  | 4.63 (0.03)                                  | 4.52 (0.02)                                  | 0.04                                 | -0.001                               |
| PO <sub>4</sub> <sup>3-</sup> C <sub>0</sub> | PO <sub>4</sub> <sup>3-</sup> C <sub>1</sub> | PO <sub>4</sub> <sup>3-</sup> C <sub>2</sub> | PO <sub>4</sub> <sup>3-</sup> flux 1 | PO <sub>4</sub> <sup>3-</sup> flux 2 |
| 0.61                                         | 0.76                                         | 0.86                                         | 0.004                                | 0.001                                |
| 0.61                                         | 0.80                                         | 0.92                                         | 0.005                                | 0.001                                |
| 0.61                                         | 0.82                                         | 0.96                                         | 0.006                                | 0.002                                |
| DOC C <sub>0</sub>                           | DOC C <sub>1</sub>                           | DOC C <sub>2</sub>                           | DOC flux 1                           | DOC flux 2                           |
| 5.76                                         | 9.15                                         | 8.27                                         | 0.09                                 | -0.01                                |
| 5.76                                         | 8.98                                         | 8.10                                         | 0.09                                 | -0.01                                |
| 5.76                                         | 9.04                                         | 8.33                                         | 0.09                                 | -0.01                                |

L2

|                                             |                                             |                                             |                                     |                                     |
|---------------------------------------------|---------------------------------------------|---------------------------------------------|-------------------------------------|-------------------------------------|
| DO C <sub>0</sub>                           | DO C <sub>1</sub>                           | DO C <sub>2</sub>                           | DO flux 1                           | DO flux 2                           |
| 7.84                                        | 7.03                                        | 6.47                                        | -0.02                               | -0.01                               |
| 7.71                                        | 6.94                                        | 6.33                                        | -0.02                               | -0.01                               |
| 7.75                                        | 6.91                                        | 6.16                                        | -0.02                               | -0.01                               |
| NO <sub>3</sub> <sup>-</sup> C <sub>0</sub> | NO <sub>3</sub> <sup>-</sup> C <sub>1</sub> | NO <sub>3</sub> <sup>-</sup> C <sub>2</sub> | NO <sub>3</sub> <sup>-</sup> flux 1 | NO <sub>3</sub> <sup>-</sup> flux 2 |

|                                              |                                              |                                              |                                      |                                      |
|----------------------------------------------|----------------------------------------------|----------------------------------------------|--------------------------------------|--------------------------------------|
| 22.96 (0.06)                                 | 21.23 (0.03)                                 | 21.04 (0.05)                                 | -0.05                                | -0.002                               |
| 22.96 (0.06)                                 | 21.14 (0.04)                                 | 20.93 (0.03)                                 | -0.05                                | -0.002                               |
| 22.96 (0.06)                                 | 21.11 (0.04)                                 | 20.86 (0.03)                                 | -0.05                                | -0.003                               |
| NH <sub>4</sub> <sup>+</sup> C <sub>0</sub>  | NH <sub>4</sub> <sup>+</sup> C <sub>1</sub>  | NH <sub>4</sub> <sup>+</sup> C <sub>2</sub>  | NH <sub>4</sub> <sup>+</sup> flux 1  | NH <sub>4</sub> <sup>+</sup> flux 2  |
| 3.12 (0.03)                                  | 4.42 (0.02)                                  | 4.34 (0.03)                                  | 0.03                                 | -0.001                               |
| 3.12 (0.03)                                  | 4.45 (0.02)                                  | 4.35 (0.02)                                  | 0.03                                 | -0.001                               |
| 3.12 (0.03)                                  | 4.54 (0.03)                                  | 4.45 (0.02)                                  | 0.04                                 | -0.001                               |
| PO <sub>4</sub> <sup>3-</sup> C <sub>0</sub> | PO <sub>4</sub> <sup>3-</sup> C <sub>1</sub> | PO <sub>4</sub> <sup>3-</sup> C <sub>2</sub> | PO <sub>4</sub> <sup>3-</sup> flux 1 | PO <sub>4</sub> <sup>3-</sup> flux 2 |
| 0.38                                         | 0.22                                         | 0.29                                         | -0.004                               | 0.001                                |
| 0.38                                         | 0.24                                         | 0.33                                         | -0.004                               | 0.001                                |
| 0.38                                         | 0.21                                         | 0.30                                         | -0.005                               | 0.001                                |
| DOC C <sub>0</sub>                           | DOC C <sub>1</sub>                           | DOC C <sub>2</sub>                           | DOC flux 1                           | DOC flux 2                           |
| 5.25                                         | 5.62                                         | 4.75                                         | 0.01                                 | -0.01                                |
| 5.25                                         | 5.66                                         | 4.88                                         | 0.01                                 | -0.01                                |
| 5.25                                         | 5.63                                         | 4.27                                         | 0.01                                 | -0.02                                |

T1

|                                              |                                              |                                              |                                      |                                      |
|----------------------------------------------|----------------------------------------------|----------------------------------------------|--------------------------------------|--------------------------------------|
| DO C <sub>0</sub>                            | DO C <sub>1</sub>                            | DO C <sub>2</sub>                            | DO flux 1                            | DO flux 2                            |
| 6.95                                         | 6.06                                         | 5.43                                         | -0.02                                | -0.01                                |
| 7.07                                         | 6.14                                         | 5.49                                         | -0.02                                | -0.01                                |
| 6.92                                         | 6.02                                         | 5.34                                         | -0.02                                | -0.01                                |
| NO <sub>3</sub> <sup>-</sup> C <sub>0</sub>  | NO <sub>3</sub> <sup>-</sup> C <sub>1</sub>  | NO <sub>3</sub> <sup>-</sup> C <sub>2</sub>  | NO <sub>3</sub> <sup>-</sup> flux 1  | NO <sub>3</sub> <sup>-</sup> flux 2  |
| 17.62 (0.05)                                 | 13.85 (0.04)                                 | 11.21 (0.02)                                 | -0.10                                | -0.03                                |
| 17.62 (0.05)                                 | 13.90 (0.02)                                 | 10.48 (0.03)                                 | -0.10                                | -0.04                                |
| 17.62 (0.05)                                 | 13.81 (0.02)                                 | 10.65 (0.03)                                 | -0.10                                | -0.04                                |
| NH <sub>4</sub> <sup>+</sup> C <sub>0</sub>  | NH <sub>4</sub> <sup>+</sup> C <sub>1</sub>  | NH <sub>4</sub> <sup>+</sup> C <sub>2</sub>  | NH <sub>4</sub> <sup>+</sup> flux 1  | NH <sub>4</sub> <sup>+</sup> flux 2  |
| 2.45 (0.02)                                  | 4.49 (0.03)                                  | 5.63 (0.02)                                  | 0.05                                 | 0.01                                 |
| 2.45 (0.02)                                  | 4.43 (0.03)                                  | 5.57 (0.02)                                  | 0.05                                 | 0.01                                 |
| 2.45 (0.02)                                  | 4.52 (0.02)                                  | 5.68 (0.03)                                  | 0.05                                 | 0.01                                 |
| PO <sub>4</sub> <sup>3-</sup> C <sub>0</sub> | PO <sub>4</sub> <sup>3-</sup> C <sub>1</sub> | PO <sub>4</sub> <sup>3-</sup> C <sub>2</sub> | PO <sub>4</sub> <sup>3-</sup> flux 1 | PO <sub>4</sub> <sup>3-</sup> flux 2 |
| 0.31                                         | 0.21                                         | 0.16                                         | -0.003                               | -0.001                               |
| 0.31                                         | 0.19                                         | 0.15                                         | -0.003                               | -0.001                               |
| 0.31                                         | 0.22                                         | 0.18                                         | -0.002                               | -0.001                               |
| DOC C <sub>0</sub>                           | DOC C <sub>1</sub>                           | DOC C <sub>2</sub>                           | DOC flux 1                           | DOC flux 2                           |
| 5.66                                         | 10.56                                        | 10.12                                        | 0.13                                 | -0.005                               |
| 5.66                                         | 10.42                                        | 9.80                                         | 0.13                                 | -0.007                               |
| 5.66                                         | 10.48                                        | 10.04                                        | 0.13                                 | -0.005                               |

T2

|                                              |                                              |                                              |                                      |                                      |
|----------------------------------------------|----------------------------------------------|----------------------------------------------|--------------------------------------|--------------------------------------|
| DO C <sub>0</sub>                            | DO C <sub>1</sub>                            | DO C <sub>2</sub>                            | DO flux 1                            | DO flux 2                            |
| 7.68                                         | 6.63                                         | 5.97                                         | -0.03                                | -0.01                                |
| 7.55                                         | 6.71                                         | 6.03                                         | -0.02                                | -0.01                                |
| 7.58                                         | 6.64                                         | 5.93                                         | -0.02                                | -0.01                                |
| NO <sub>3</sub> <sup>-</sup> C <sub>0</sub>  | NO <sub>3</sub> <sup>-</sup> C <sub>1</sub>  | NO <sub>3</sub> <sup>-</sup> C <sub>2</sub>  | NO <sub>3</sub> <sup>-</sup> flux 1  | NO <sub>3</sub> <sup>-</sup> flux 2  |
| 31.12 (0.03)                                 | 28.87 (0.03)                                 | 27.77 (0.02)                                 | -0.06                                | -0.01                                |
| 31.12 (0.03)                                 | 28.76 (0.02)                                 | 27.68 (0.03)                                 | -0.06                                | -0.01                                |
| 31.12 (0.03)                                 | 28.81 (0.02)                                 | 27.72 (0.03)                                 | -0.06                                | -0.01                                |
| NH <sub>4</sub> <sup>+</sup> C <sub>0</sub>  | NH <sub>4</sub> <sup>+</sup> C <sub>1</sub>  | NH <sub>4</sub> <sup>+</sup> C <sub>2</sub>  | NH <sub>4</sub> <sup>+</sup> flux 1  | NH <sub>4</sub> <sup>+</sup> flux 2  |
| 2.57 (0.03)                                  | 3.97 (0.03)                                  | 4.21 (0.04)                                  | 0.04                                 | 0.003                                |
| 2.57 (0.03)                                  | 3.88 (0.03)                                  | 4.14 (0.03)                                  | 0.03                                 | 0.003                                |
| 2.57 (0.03)                                  | 4.02 (0.02)                                  | 4.24 (0.04)                                  | 0.04                                 | 0.003                                |
| PO <sub>4</sub> <sup>3-</sup> C <sub>0</sub> | PO <sub>4</sub> <sup>3-</sup> C <sub>1</sub> | PO <sub>4</sub> <sup>3-</sup> C <sub>2</sub> | PO <sub>4</sub> <sup>3-</sup> flux 1 | PO <sub>4</sub> <sup>3-</sup> flux 2 |
| 0.42                                         | 0.31                                         | 0.25                                         | -0.003                               | -0.001                               |
| 0.42                                         | 0.29                                         | 0.22                                         | -0.003                               | -0.001                               |
| 0.42                                         | 0.28                                         | 0.20                                         | -0.004                               | -0.001                               |
| DOC C <sub>0</sub>                           | DOC C <sub>1</sub>                           | DOC C <sub>2</sub>                           | DOC flux 1                           | DOC flux 2                           |
| 5.63                                         | 7.14                                         | 6.26                                         | 0.04                                 | -0.01                                |
| 5.63                                         | 7.05                                         | 6.14                                         | 0.04                                 | -0.01                                |
| 5.63                                         | 7.19                                         | 6.33                                         | 0.04                                 | -0.01                                |

W1

|                   |                   |                   |           |           |
|-------------------|-------------------|-------------------|-----------|-----------|
| DO C <sub>0</sub> | DO C <sub>1</sub> | DO C <sub>2</sub> | DO flux 1 | DO flux 2 |
|-------------------|-------------------|-------------------|-----------|-----------|



|                               |                               |                               |                                  |                                  |
|-------------------------------|-------------------------------|-------------------------------|----------------------------------|----------------------------------|
| 7.96                          | 7.04                          | 6.56                          | -0.02                            | -0.01                            |
| 7.92                          | 6.95                          | 6.45                          | -0.03                            | -0.01                            |
| 7.85                          | 6.86                          | 6.63                          | -0.03                            | -0.01                            |
| $\text{NO}_3^- \text{C}_0$    | $\text{NO}_3^- \text{C}_1$    | $\text{NO}_3^- \text{C}_2$    | $\text{NO}_3^- \text{flux 1}$    | $\text{NO}_3^- \text{flux 2}$    |
| 13.85 (0.04)                  | 15.23 (0.04)                  | 17.62 (0.03)                  | 0.04                             | 0.03                             |
| 13.85 (0.04)                  | 15.28 (0.03)                  | 17.78 (0.04)                  | 0.04                             | 0.03                             |
| 13.85 (0.04)                  | 15.35 (0.03)                  | 17.86 (0.03)                  | 0.04                             | 0.03                             |
| $\text{NH}_4^+ \text{C}_0$    | $\text{NH}_4^+ \text{C}_1$    | $\text{NH}_4^+ \text{C}_2$    | $\text{NH}_4^+ \text{flux 1}$    | $\text{NH}_4^+ \text{flux 2}$    |
| 2.48 (0.02)                   | 3.92 (0.03)                   | 4.33 (0.02)                   | 0.04                             | 0.005                            |
| 2.48 (0.02)                   | 3.82 (0.02)                   | 4.20 (0.02)                   | 0.04                             | 0.005                            |
| 2.48 (0.02)                   | 4.05 (0.02)                   | 4.45 (0.02)                   | 0.04                             | 0.005                            |
| $\text{PO}_4^{3-} \text{C}_0$ | $\text{PO}_4^{3-} \text{C}_1$ | $\text{PO}_4^{3-} \text{C}_2$ | $\text{PO}_4^{3-} \text{flux 1}$ | $\text{PO}_4^{3-} \text{flux 2}$ |
| 0.54                          | 0.46                          | 0.56                          | -0.002                           | 0.001                            |
| 0.54                          | 0.43                          | 0.57                          | -0.003                           | 0.001                            |
| 0.54                          | 0.39                          | 0.52                          | -0.004                           | 0.001                            |
| $\text{DOC C}_0$              | $\text{DOC C}_1$              | $\text{DOC C}_2$              | $\text{DOC flux 1}$              | $\text{DOC flux 2}$              |
| 4.60                          | 5.35                          | 4.47                          | 0.02                             | -0.01                            |
| 4.60                          | 5.38                          | 4.49                          | 0.02                             | -0.01                            |
| 4.60                          | 5.40                          | 4.50                          | 0.02                             | -0.01                            |

W2

|                               |                               |                               |                                  |                                  |
|-------------------------------|-------------------------------|-------------------------------|----------------------------------|----------------------------------|
| $\text{DO C}_0$               | $\text{DO C}_1$               | $\text{DO C}_2$               | $\text{DO flux 1}$               | $\text{DO flux 2}$               |
| 7.53                          | 6.64                          | 5.92                          | -0.02                            | -0.01                            |
| 7.46                          | 6.52                          | 5.79                          | -0.02                            | -0.01                            |
| 7.38                          | 6.35                          | 5.61                          | -0.03                            | -0.01                            |
| $\text{NO}_3^- \text{C}_0$    | $\text{NO}_3^- \text{C}_1$    | $\text{NO}_3^- \text{C}_2$    | $\text{NO}_3^- \text{flux 1}$    | $\text{NO}_3^- \text{flux 2}$    |
| 18.99 (0.03)                  | 19.53 (0.04)                  | 15.37 (0.04)                  | 0.01                             | -0.05                            |
| 18.99 (0.03)                  | 19.59 (0.03)                  | 15.44 (0.02)                  | 0.02                             | -0.05                            |
| 18.99 (0.03)                  | 19.57 (0.03)                  | 15.40 (0.02)                  | 0.02                             | -0.05                            |
| $\text{NH}_4^+ \text{C}_0$    | $\text{NH}_4^+ \text{C}_1$    | $\text{NH}_4^+ \text{C}_2$    | $\text{NH}_4^+ \text{flux 1}$    | $\text{NH}_4^+ \text{flux 2}$    |
| 2.63 (0.02)                   | 3.68 (0.03)                   | 3.47 (0.03)                   | 0.03                             | -0.002                           |
| 2.63 (0.02)                   | 3.64 (0.02)                   | 3.42 (0.02)                   | 0.03                             | -0.003                           |
| 2.63 (0.02)                   | 3.71 (0.02)                   | 3.48 (0.02)                   | 0.03                             | -0.003                           |
| $\text{PO}_4^{3-} \text{C}_0$ | $\text{PO}_4^{3-} \text{C}_1$ | $\text{PO}_4^{3-} \text{C}_2$ | $\text{PO}_4^{3-} \text{flux 1}$ | $\text{PO}_4^{3-} \text{flux 2}$ |
| 0.69                          | 0.56                          | 0.45                          | -0.003                           | -0.001                           |
| 0.69                          | 0.51                          | 0.43                          | -0.005                           | -0.001                           |
| 0.69                          | 0.54                          | 0.41                          | -0.004                           | -0.001                           |
| $\text{DOC C}_0$              | $\text{DOC C}_1$              | $\text{DOC C}_2$              | $\text{DOC flux 1}$              | $\text{DOC flux 2}$              |
| 5.26                          | 5.64                          | 5.11                          | 0.01                             | -0.006                           |
| 5.26                          | 5.66                          | 5.04                          | 0.01                             | -0.007                           |
| 5.26                          | 5.69                          | 5.16                          | 0.01                             | -0.006                           |

Table S3. 0-3 min exposure flux measurement with zinc chloride for summer study

| L1                                           |                                              |                                      | L2                                           |                                              |                                      |
|----------------------------------------------|----------------------------------------------|--------------------------------------|----------------------------------------------|----------------------------------------------|--------------------------------------|
| DO C <sub>0</sub>                            | DO C <sub>1</sub>                            | DO flux 1                            | DO C <sub>0</sub>                            | DO C <sub>1</sub>                            | DO flux 1                            |
| 7.76                                         | 6.92                                         | -0.02                                | 7.84                                         | 7.15                                         | -0.02                                |
| 7.64                                         | 6.81                                         | -0.02                                | 7.71                                         | 7.01                                         | -0.02                                |
| 7.55                                         | 6.87                                         | -0.02                                | 7.75                                         | 7.07                                         | -0.02                                |
| NO <sub>3</sub> <sup>-</sup> C <sub>0</sub>  | NO <sub>3</sub> <sup>-</sup> C <sub>1</sub>  | NO <sub>3</sub> <sup>-</sup> flux 1  | NO <sub>3</sub> <sup>-</sup> C <sub>0</sub>  | NO <sub>3</sub> <sup>-</sup> C <sub>1</sub>  | NO <sub>3</sub> <sup>-</sup> flux 1  |
| 23.37 (0.06)                                 | 22.37 (0.04)                                 | -0.03                                | 22.96 (0.06)                                 | 21.35 (0.03)                                 | -0.04                                |
| 23.37 (0.06)                                 | 22.32 (0.03)                                 | -0.03                                | 22.96 (0.06)                                 | 21.42 (0.04)                                 | -0.04                                |
| 23.37 (0.06)                                 | 22.34 (0.04)                                 | -0.03                                | 22.96 (0.06)                                 | 21.28 (0.03)                                 | -0.04                                |
| NH <sub>4</sub> <sup>+</sup> C <sub>0</sub>  | NH <sub>4</sub> <sup>+</sup> C <sub>1</sub>  | NH <sub>4</sub> <sup>+</sup> flux 1  | NH <sub>4</sub> <sup>+</sup> C <sub>0</sub>  | NH <sub>4</sub> <sup>+</sup> C <sub>1</sub>  | NH <sub>4</sub> <sup>+</sup> flux 1  |
| 3.30 (0.01)                                  | 4.34 (0.03)                                  | 0.03                                 | 3.12 (0.03)                                  | 4.34 (0.02)                                  | 0.03                                 |
| 3.30 (0.01)                                  | 4.25 (0.03)                                  | 0.03                                 | 3.12 (0.02)                                  | 4.26 (0.03)                                  | 0.03                                 |
| 3.30 (0.01)                                  | 4.45 (0.02)                                  | 0.03                                 | 3.12 (0.02)                                  | 4.42 (0.03)                                  | 0.03                                 |
| PO <sub>4</sub> <sup>3-</sup> C <sub>0</sub> | PO <sub>4</sub> <sup>3-</sup> C <sub>1</sub> | PO <sub>4</sub> <sup>3-</sup> flux 1 | PO <sub>4</sub> <sup>3-</sup> C <sub>0</sub> | PO <sub>4</sub> <sup>3-</sup> C <sub>1</sub> | PO <sub>4</sub> <sup>3-</sup> flux 1 |
| 0.61                                         | 0.72                                         | 0.003                                | 0.38                                         | 0.24                                         | -0.004                               |
| 0.61                                         | 0.75                                         | 0.004                                | 0.38                                         | 0.21                                         | -0.005                               |
| 0.61                                         | 0.77                                         | 0.004                                | 0.38                                         | 0.22                                         | -0.004                               |
| DOC C <sub>0</sub>                           | DOC C <sub>1</sub>                           | DOC flux 1                           | DOC C <sub>0</sub>                           | DOC C <sub>1</sub>                           | DOC flux 1                           |
| 5.76                                         | 9.15                                         | 0.09                                 | 5.25                                         | 5.68                                         | 0.01                                 |
| 5.76                                         | 9.24                                         | 0.09                                 | 5.25                                         | 5.72                                         | 0.01                                 |
| 5.76                                         | 9.28                                         | 0.09                                 | 5.25                                         | 5.67                                         | 0.01                                 |

  

| T1                                           |                                              |                                      | T2                                           |                                              |                                      |
|----------------------------------------------|----------------------------------------------|--------------------------------------|----------------------------------------------|----------------------------------------------|--------------------------------------|
| DO C <sub>0</sub>                            | DO C <sub>1</sub>                            | DO flux 1                            | DO C <sub>0</sub>                            | DO C <sub>1</sub>                            | DO flux 1                            |
| 6.95                                         | 6.17                                         | -0.02                                | 7.68                                         | 6.83                                         | -0.02                                |
| 7.07                                         | 6.29                                         | -0.02                                | 7.55                                         | 6.77                                         | -0.02                                |
| 6.92                                         | 6.23                                         | -0.02                                | 7.58                                         | 6.72                                         | -0.02                                |
| NO <sub>3</sub> <sup>-</sup> C <sub>0</sub>  | NO <sub>3</sub> <sup>-</sup> C <sub>1</sub>  | NO <sub>3</sub> <sup>-</sup> flux 1  | NO <sub>3</sub> <sup>-</sup> C <sub>0</sub>  | NO <sub>3</sub> <sup>-</sup> C <sub>1</sub>  | NO <sub>3</sub> <sup>-</sup> flux 1  |
| 17.62 (0.05)                                 | 13.48 (0.04)                                 | -0.11                                | 31.12 (0.03)                                 | 28.77 (0.02)                                 | -0.06                                |
| 17.62 (0.05)                                 | 13.85 (0.03)                                 | -0.10                                | 31.12 (0.03)                                 | 28.71 (0.02)                                 | -0.06                                |
| 17.62 (0.05)                                 | 14.02 (0.03)                                 | -0.10                                | 31.12 (0.03)                                 | 28.64 (0.03)                                 | -0.07                                |
| NH <sub>4</sub> <sup>+</sup> C <sub>0</sub>  | NH <sub>4</sub> <sup>+</sup> C <sub>1</sub>  | NH <sub>4</sub> <sup>+</sup> flux 1  | NH <sub>4</sub> <sup>+</sup> C <sub>0</sub>  | NH <sub>4</sub> <sup>+</sup> C <sub>1</sub>  | NH <sub>4</sub> <sup>+</sup> flux 1  |
| 2.45 (0.02)                                  | 4.38 (0.03)                                  | 0.05                                 | 2.57 (0.03)                                  | 3.88 (0.03)                                  | 0.03                                 |
| 2.45 (0.02)                                  | 4.33 (0.03)                                  | 0.05                                 | 2.57 (0.03)                                  | 3.95 (0.04)                                  | 0.04                                 |
| 2.45 (0.02)                                  | 4.41 (0.02)                                  | 0.05                                 | 2.57 (0.03)                                  | 3.97 (0.03)                                  | 0.04                                 |
| PO <sub>4</sub> <sup>3-</sup> C <sub>0</sub> | PO <sub>4</sub> <sup>3-</sup> C <sub>1</sub> | PO <sub>4</sub> <sup>3-</sup> flux 1 | PO <sub>4</sub> <sup>3-</sup> C <sub>0</sub> | PO <sub>4</sub> <sup>3-</sup> C <sub>1</sub> | PO <sub>4</sub> <sup>3-</sup> flux 1 |
| 0.31                                         | 0.23                                         | -0.002                               | 0.42                                         | 0.29                                         | -0.003                               |
| 0.31                                         | 0.17                                         | -0.003                               | 0.42                                         | 0.30                                         | -0.003                               |
| 0.31                                         | 0.20                                         | -0.003                               | 0.42                                         | 0.27                                         | -0.004                               |
| DOC C <sub>0</sub>                           | DOC C <sub>1</sub>                           | DOC flux 1                           | DOC C <sub>0</sub>                           | DOC C <sub>1</sub>                           | DOC flux 1                           |
| 5.66                                         | 10.18                                        | 0.12                                 | 5.63                                         | 7.14                                         | 0.04                                 |
| 5.66                                         | 10.35                                        | 0.12                                 | 5.63                                         | 7.22                                         | 0.04                                 |
| 5.66                                         | 10.26                                        | 0.12                                 | 5.63                                         | 7.30                                         | 0.04                                 |

  

| W1                                           |                                              |                                      | W2                                           |                                              |                                      |
|----------------------------------------------|----------------------------------------------|--------------------------------------|----------------------------------------------|----------------------------------------------|--------------------------------------|
| DO C <sub>0</sub>                            | DO C <sub>1</sub>                            | DO flux 1                            | DO C <sub>0</sub>                            | DO C <sub>1</sub>                            | DO flux 1                            |
| 7.96                                         | 7.22                                         | -0.02                                | 7.53                                         | 6.74                                         | -0.02                                |
| 7.92                                         | 7.12                                         | -0.02                                | 7.46                                         | 6.62                                         | -0.02                                |
| 7.85                                         | 7.08                                         | -0.02                                | 7.38                                         | 6.65                                         | -0.02                                |
| NO <sub>3</sub> <sup>-</sup> C <sub>0</sub>  | NO <sub>3</sub> <sup>-</sup> C <sub>1</sub>  | NO <sub>3</sub> <sup>-</sup> flux 1  | NO <sub>3</sub> <sup>-</sup> C <sub>0</sub>  | NO <sub>3</sub> <sup>-</sup> C <sub>1</sub>  | NO <sub>3</sub> <sup>-</sup> flux 1  |
| 13.85 (0.04)                                 | 15.33 (0.03)                                 | 0.04                                 | 18.99 (0.03)                                 | 19.66 (0.02)                                 | 0.02                                 |
| 13.85 (0.04)                                 | 15.37 (0.02)                                 | 0.04                                 | 18.99 (0.03)                                 | 19.57 (0.02)                                 | 0.02                                 |
| 13.85 (0.04)                                 | 15.31 (0.03)                                 | 0.04                                 | 18.99 (0.03)                                 | 19.63 (0.03)                                 | 0.02                                 |
| NH <sub>4</sub> <sup>+</sup> C <sub>0</sub>  | NH <sub>4</sub> <sup>+</sup> C <sub>1</sub>  | NH <sub>4</sub> <sup>+</sup> flux 1  | NH <sub>4</sub> <sup>+</sup> C <sub>0</sub>  | NH <sub>4</sub> <sup>+</sup> C <sub>1</sub>  | NH <sub>4</sub> <sup>+</sup> flux 1  |
| 2.48 (0.02)                                  | 3.98 (0.03)                                  | 0.04                                 | 2.63 (0.02)                                  | 3.56 (0.02)                                  | 0.02                                 |
| 2.48 (0.02)                                  | 3.82 (0.03)                                  | 0.04                                 | 2.63 (0.02)                                  | 3.60 (0.02)                                  | 0.03                                 |
| 2.48 (0.02)                                  | 4.10 (0.02)                                  | 0.04                                 | 2.63 (0.02)                                  | 3.66 (0.03)                                  | 0.03                                 |
| PO <sub>4</sub> <sup>3-</sup> C <sub>0</sub> | PO <sub>4</sub> <sup>3-</sup> C <sub>1</sub> | PO <sub>4</sub> <sup>3-</sup> flux 1 | PO <sub>4</sub> <sup>3-</sup> C <sub>0</sub> | PO <sub>4</sub> <sup>3-</sup> C <sub>1</sub> | PO <sub>4</sub> <sup>3-</sup> flux 1 |
| 0.54                                         | 0.43                                         | -0.003                               | 0.69                                         | 0.53                                         | -0.004                               |
| 0.54                                         | 0.46                                         | -0.002                               | 0.69                                         | 0.55                                         | -0.004                               |

|                    |                    |            |                    |                    |            |
|--------------------|--------------------|------------|--------------------|--------------------|------------|
| 0.54               | 0.47               | -0.002     | 0.69               | 0.49               | -0.005     |
| DOC C <sub>0</sub> | DOC C <sub>1</sub> | DOC flux 1 | DOC C <sub>0</sub> | DOC C <sub>1</sub> | DOC flux 1 |
| 4.60               | 5.35               | 0.02       | 5.26               | 5.65               | 0.01       |
| 4.60               | 5.37               | 0.02       | 5.26               | 5.67               | 0.01       |
| 4.60               | 5.33               | 0.02       | 5.26               | 5.64               | 0.01       |

Table S4. Equilibrium flux of nutrients at sediment-water interface

Autumn flux

L1 NO<sub>3</sub><sup>-</sup> W=26g

|                       |                                           |        |         |         |         |
|-----------------------|-------------------------------------------|--------|---------|---------|---------|
| C <sub>0</sub> (mg/L) | 10                                        | 20     | 30      | 40      | 50      |
| C <sub>1</sub> (mg/L) | 16.77                                     | 21.65  | 26.58   | 31.26   | 36.56   |
| Q (mg/g)              | 0.0391                                    | 0.0095 | -0.0197 | -0.0504 | -0.0775 |
| equation              | C=-341.04Q+23.240 (r <sup>2</sup> =0.999) |        |         |         |         |

L1 NH<sub>4</sub><sup>+</sup> W=26g

|                       |                                          |        |        |        |        |
|-----------------------|------------------------------------------|--------|--------|--------|--------|
| C <sub>0</sub> (mg/L) | 0.5                                      | 0.8    | 1.0    | 1.5    | 2.0    |
| C <sub>1</sub> (mg/L) | 1.26                                     | 1.41   | 1.55   | 1.74   | 2.02   |
| Q (mg/g)              | 0.0044                                   | 0.0035 | 0.0032 | 0.0014 | 0.0001 |
| equation              | C=-342.50Q+2.022 (r <sup>2</sup> =0.995) |        |        |        |        |

L1 PO<sub>4</sub><sup>3-</sup> W=26g

|                       |                                          |         |         |         |         |
|-----------------------|------------------------------------------|---------|---------|---------|---------|
| C <sub>0</sub> (mg/L) | 0.5                                      | 1.0     | 1.5     | 2.0     | 3.0     |
| C <sub>1</sub> (mg/L) | 24.65                                    | 28.31   | 30.69   | 34.35   | 43.58   |
| Q (mg/g)              | 0.0014                                   | -0.0001 | -0.0015 | -0.0023 | -0.0060 |
| equation              | C=-343.63Q+1.017 (r <sup>2</sup> =0.985) |         |         |         |         |

L1 DOC W=26g

|                       |                                           |        |        |         |         |
|-----------------------|-------------------------------------------|--------|--------|---------|---------|
| C <sub>0</sub> (mg/L) | 5                                         | 8      | 10     | 15      | 20      |
| C <sub>1</sub> (mg/L) | 8.13                                      | 9.76   | 11.78  | 12.85   | 14.76   |
| Q (mg/g)              | 0.0181                                    | 0.0102 | 0.0103 | -0.0124 | -0.0302 |
| equation              | C=-292.87Q+11.357 (r <sup>2</sup> =0.971) |        |        |         |         |

L2 NO<sub>3</sub><sup>-</sup> W=16g

|                       |                                           |        |        |        |         |
|-----------------------|-------------------------------------------|--------|--------|--------|---------|
| C <sub>0</sub> (mg/L) | 10                                        | 20     | 30     | 40     | 50      |
| C <sub>1</sub> (mg/L) | 24.86                                     | 30.45  | 35.58  | 40.72  | 45.76   |
| Q (mg/g)              | 0.1393                                    | 0.0980 | 0.0523 | 0.0068 | -0.0398 |
| equation              | C=-222.45Q+41.416 (r <sup>2</sup> =0.999) |        |        |        |         |

L2 NH<sub>4</sub><sup>+</sup> W=16g

|                       |                                          |        |        |        |         |
|-----------------------|------------------------------------------|--------|--------|--------|---------|
| C <sub>0</sub> (mg/L) | 0.5                                      | 0.8    | 1.0    | 1.5    | 2.0     |
| C <sub>1</sub> (mg/L) | 1.12                                     | 1.29   | 1.48   | 1.69   | 1.88    |
| Q (mg/g)              | 0.0058                                   | 0.0046 | 0.0045 | 0.0018 | -0.0011 |
| equation              | C=-210.33Q+1.815 (r <sup>2</sup> =0.976) |        |        |        |         |

L2 PO<sub>4</sub><sup>3-</sup> W=16g

|                       |                                          |        |        |         |         |
|-----------------------|------------------------------------------|--------|--------|---------|---------|
| C <sub>0</sub> (mg/L) | 0.5                                      | 1.0    | 1.5    | 2.0     | 3.0     |
| C <sub>1</sub> (mg/L) | 0.91                                     | 1.12   | 1.49   | 1.74    | 2.18    |
| Q (mg/g)              | 0.0038                                   | 0.0011 | 0.0001 | -0.0024 | -0.0077 |
| equation              | C=-220.06Q+1.369 (r <sup>2</sup> =0.989) |        |        |         |         |

L2 DOC W=16g

|                       |                                           |        |        |        |         |
|-----------------------|-------------------------------------------|--------|--------|--------|---------|
| C <sub>0</sub> (mg/L) | 5                                         | 8      | 10     | 15     | 20      |
| C <sub>1</sub> (mg/L) | 10.83                                     | 11.76  | 13.28  | 15.73  | 18.28   |
| Q (mg/g)              | 0.0547                                    | 0.0353 | 0.0308 | 0.0068 | -0.0161 |
| equation              | C=-351.38Q+16.417 (r <sup>2</sup> =0.994) |        |        |        |         |

T1 NO<sub>3</sub><sup>-</sup> W=19g

|                       |                                           |        |        |         |         |
|-----------------------|-------------------------------------------|--------|--------|---------|---------|
| C <sub>0</sub> (mg/L) | 10                                        | 20     | 30     | 40      | 50      |
| C <sub>1</sub> (mg/L) | 23.78                                     | 28.66  | 34.35  | 38.73   | 44.41   |
| Q (mg/g)              | 0.1088                                    | 0.0684 | 0.0343 | -0.0100 | -0.0441 |
| equation              | C=-259.87Q+38.178 (r <sup>2</sup> =0.999) |        |        |         |         |

T1 NH<sub>4</sub><sup>+</sup> W=19g

|                       |                                          |        |        |        |         |
|-----------------------|------------------------------------------|--------|--------|--------|---------|
| C <sub>0</sub> (mg/L) | 0.5                                      | 0.8    | 1.0    | 1.5    | 2.0     |
| C <sub>1</sub> (mg/L) | 1.03                                     | 1.27   | 1.38   | 1.58   | 1.82    |
| Q (mg/g)              | 0.0042                                   | 0.0037 | 0.0030 | 0.0006 | -0.0014 |
| equation              | C=-249.49Q+1.664 (r <sup>2</sup> =0.982) |        |        |        |         |

T1 PO<sub>4</sub><sup>3-</sup> W=19g

|                       |                                          |         |         |         |         |
|-----------------------|------------------------------------------|---------|---------|---------|---------|
| C <sub>0</sub> (mg/L) | 0.5                                      | 1.0     | 1.5     | 2.0     | 3.0     |
| C <sub>1</sub> (mg/L) | 0.66                                     | 0.93    | 1.18    | 1.48    | 1.89    |
| Q (mg/g)              | 0.0014                                   | -0.0006 | -0.0028 | -0.0046 | -0.0098 |
| equation              | C=-223.91Q+0.865 (r <sup>2</sup> =0.995) |         |         |         |         |

T1 DOC W=19g

|                       |                                           |        |         |         |         |
|-----------------------|-------------------------------------------|--------|---------|---------|---------|
| C <sub>0</sub> (mg/L) | 5                                         | 8      | 10      | 15      | 20      |
| C <sub>1</sub> (mg/L) | 8.76                                      | 9.14   | 9.82    | 14.10   | 17.18   |
| Q (mg/g)              | 0.0297                                    | 0.0090 | -0.0014 | -0.0071 | -0.0223 |
| equation              | C=-291.92Q+12.062 (r <sup>2</sup> =0.904) |        |         |         |         |

T2 NO<sub>3</sub><sup>-</sup> W=17g

|                       |                                           |        |        |         |         |
|-----------------------|-------------------------------------------|--------|--------|---------|---------|
| C <sub>0</sub> (mg/L) | 10                                        | 20     | 30     | 40      | 50      |
| C <sub>1</sub> (mg/L) | 20.34                                     | 25.73  | 31.53  | 36.13   | 40.82   |
| Q (mg/g)              | 0.0912                                    | 0.0506 | 0.0135 | -0.0341 | -0.0810 |
| equation              | C=-232.40Q+31.866 (r <sup>2</sup> =0.997) |        |        |         |         |

T2 NH<sub>4</sub><sup>+</sup> W=17g

|                       |                                          |        |        |        |         |
|-----------------------|------------------------------------------|--------|--------|--------|---------|
| C <sub>0</sub> (mg/L) | 0.5                                      | 0.8    | 1.0    | 1.5    | 2.0     |
| C <sub>1</sub> (mg/L) | 1.12                                     | 1.24   | 1.31   | 1.61   | 1.69    |
| Q (mg/g)              | 0.0055                                   | 0.0039 | 0.0027 | 0.0010 | -0.0027 |
| equation              | C=-187.25Q+1.547 (r <sup>2</sup> =0.983) |        |        |        |         |

T2 PO<sub>4</sub><sup>3-</sup> W=17g

|                       |                                          |        |         |         |         |
|-----------------------|------------------------------------------|--------|---------|---------|---------|
| C <sub>0</sub> (mg/L) | 0.5                                      | 1.0    | 1.5     | 2.0     | 3.0     |
| C <sub>1</sub> (mg/L) | 0.85                                     | 1.09   | 1.34    | 1.69    | 2.11    |
| Q (mg/g)              | 0.0028                                   | 0.0007 | -0.0013 | -0.0024 | -0.0070 |
| equation              | C=-259.52Q+1.223 (r <sup>2</sup> =0.993) |        |         |         |         |

T2 DOC W=17g

|                       |                                           |        |        |         |         |
|-----------------------|-------------------------------------------|--------|--------|---------|---------|
| C <sub>0</sub> (mg/L) | 5                                         | 8      | 10     | 15      | 20      |
| C <sub>1</sub> (mg/L) | 9.67                                      | 11.25  | 11.83  | 14.75   | 18.26   |
| Q (mg/g)              | 0.0412                                    | 0.0287 | 0.0161 | -0.0022 | -0.0154 |
| equation              | C=-257.88Q+15.131 (r <sup>2</sup> =0.982) |        |        |         |         |

W1 NO<sub>3</sub><sup>-</sup> W=20g

|                       |                                           |         |         |         |         |
|-----------------------|-------------------------------------------|---------|---------|---------|---------|
| C <sub>0</sub> (mg/L) | 10                                        | 20      | 30      | 40      | 50      |
| C <sub>1</sub> (mg/L) | 13.88                                     | 18.67   | 23.39   | 28.73   | 34.35   |
| Q (mg/g)              | 0.0291                                    | -0.0010 | -0.0496 | -0.0845 | -0.1174 |
| equation              | C=-271.66Q+17.376 (r <sup>2</sup> =0.998) |         |         |         |         |

W1 NH<sub>4</sub><sup>+</sup> W=20g

|                       |                                          |        |        |         |         |
|-----------------------|------------------------------------------|--------|--------|---------|---------|
| C <sub>0</sub> (mg/L) | 0.5                                      | 0.8    | 1.0    | 1.5     | 2.0     |
| C <sub>1</sub> (mg/L) | 0.92                                     | 1.06   | 1.22   | 1.42    | 1.67    |
| Q (mg/g)              | 0.0032                                   | 0.0020 | 0.0017 | -0.0006 | -0.0025 |
| equation              | C=-263.35Q+1.354 (r <sup>2</sup> =0.994) |        |        |         |         |

W1 PO<sub>4</sub><sup>3-</sup> W=20g

|                       |                                          |         |         |         |         |
|-----------------------|------------------------------------------|---------|---------|---------|---------|
| C <sub>0</sub> (mg/L) | 0.5                                      | 1.0     | 1.5     | 2.0     | 3.0     |
| C <sub>1</sub> (mg/L) | 0.71                                     | 0.95    | 1.22    | 1.48    | 1.98    |
| Q (mg/g)              | 0.0016                                   | -0.0004 | -0.0021 | -0.0039 | -0.0077 |
| equation              | C=-272.64Q+0.921 (r <sup>2</sup> =0.999) |         |         |         |         |

W1 DOC W=20g

|                       |                                           |        |        |        |         |
|-----------------------|-------------------------------------------|--------|--------|--------|---------|
| C <sub>0</sub> (mg/L) | 5                                         | 8      | 10     | 15     | 20      |
| C <sub>1</sub> (mg/L) | 10.23                                     | 11.84  | 13.10  | 15.62  | 17.82   |
| Q (mg/g)              | 0.0392                                    | 0.0288 | 0.0233 | 0.0047 | -0.0164 |
| equation              | C=-269.95Q+15.896 (r <sup>2</sup> =0.997) |        |        |        |         |

W2 NO<sub>3</sub><sup>-</sup> W=18g

|                       |                                           |         |         |         |         |
|-----------------------|-------------------------------------------|---------|---------|---------|---------|
| C <sub>0</sub> (mg/L) | 10                                        | 20      | 30      | 40      | 50      |
| C <sub>1</sub> (mg/L) | 14.15                                     | 18.33   | 24.51   | 29.56   | 34.62   |
| Q (mg/g)              | 0.0346                                    | -0.0139 | -0.0458 | -0.0870 | -0.1282 |
| equation              | C=-250.14Q+17.991 (r <sup>2</sup> =0.997) |         |         |         |         |

W2 NH<sub>4</sub><sup>+</sup> W=18g

|                       |                                          |        |        |        |         |
|-----------------------|------------------------------------------|--------|--------|--------|---------|
| C <sub>0</sub> (mg/L) | 0.5                                      | 0.8    | 1.0    | 1.5    | 2.0     |
| C <sub>1</sub> (mg/L) | 1.02                                     | 1.13   | 1.29   | 1.55   | 1.88    |
| Q (mg/g)              | 0.0043                                   | 0.0028 | 0.0024 | 0.0004 | -0.0010 |
| equation              | C=-282.76Q+1.664 (r <sup>2</sup> =0.988) |        |        |        |         |

W2 PO<sub>4</sub><sup>3-</sup> W=18g

|                       |        |         |         |         |         |
|-----------------------|--------|---------|---------|---------|---------|
| C <sub>0</sub> (mg/L) | 0.5    | 1.0     | 1.5     | 2.0     | 3.0     |
| C <sub>1</sub> (mg/L) | 0.61   | 0.86    | 1.24    | 1.61    | 2.08    |
| Q (mg/g)              | 0.0009 | -0.0012 | -0.0022 | -0.0033 | -0.0077 |

|                                        |                                           |         |         |         |         |
|----------------------------------------|-------------------------------------------|---------|---------|---------|---------|
| equation                               | C=-298.05Q+0.805 (r <sup>2</sup> =0.977)  |         |         |         |         |
| W2 DOC W=18g                           |                                           |         |         |         |         |
| C <sub>0</sub> (mg/L)                  | 5                                         | 8       | 10      | 15      | 20      |
| C <sub>1</sub> (mg/L)                  | 7.32                                      | 8.87    | 9.95    | 13.13   | 16.64   |
| Q (mg/g)                               | 0.0193                                    | 0.0073  | -0.0004 | -0.0158 | -0.0280 |
| equation                               | C=-316.81Q+10.496 (r <sup>2</sup> =0.990) |         |         |         |         |
| Winter flux                            |                                           |         |         |         |         |
| L1 NO <sub>3</sub> <sup>-</sup> W=23g  |                                           |         |         |         |         |
| C <sub>0</sub> (mg/L)                  | 10                                        | 20      | 30      | 40      | 50      |
| C <sub>1</sub> (mg/L)                  | 26.88                                     | 32.65   | 36.68   | 43.20   | 47.72   |
| Q (mg/g)                               | 0.1101                                    | 0.0825  | 0.0436  | 0.0209  | -0.0147 |
| equation                               | C=-319.45Q+45.471 (r <sup>2</sup> =0.995) |         |         |         |         |
| L1 NH <sub>4</sub> <sup>+</sup> W=23g  |                                           |         |         |         |         |
| C <sub>0</sub> (mg/L)                  | 0.5                                       | 0.8     | 1.0     | 1.5     | 2.0     |
| C <sub>1</sub> (mg/L)                  | 1.92                                      | 2.08    | 2.25    | 2.42    | 2.76    |
| Q (mg/g)                               | 0.0093                                    | 0.0083  | 0.0082  | 0.0060  | 0.0050  |
| equation                               | C=-175.15Q+3.572 (r <sup>2</sup> =0.937)  |         |         |         |         |
| L1 PO <sub>4</sub> <sup>3-</sup> W=23g |                                           |         |         |         |         |
| C <sub>0</sub> (mg/L)                  | 0.5                                       | 1.0     | 1.5     | 2.0     | 3.0     |
| C <sub>1</sub> (mg/L)                  | 0.63                                      | 0.98    | 1.27    | 1.52    | 1.88    |
| Q (mg/g)                               | 0.0008                                    | -0.0001 | -0.0015 | -0.0031 | -0.0073 |
| equation                               | C=-297.33Q+0.933 (r <sup>2</sup> =0.979)  |         |         |         |         |
| L1 DOC W=23g                           |                                           |         |         |         |         |
| C <sub>0</sub> (mg/L)                  | 5                                         | 8       | 10      | 15      | 20      |
| C <sub>1</sub> (mg/L)                  | 9.98                                      | 12.24   | 12.93   | 14.85   | 16.46   |
| Q (mg/g)                               | 0.0325                                    | 0.0277  | 0.0191  | -0.0010 | -0.0231 |
| equation                               | C=-103.44Q+14.433 (r <sup>2</sup> =0.915) |         |         |         |         |
| L2 NO <sub>3</sub> <sup>-</sup> W=20g  |                                           |         |         |         |         |
| C <sub>0</sub> (mg/L)                  | 10                                        | 20      | 30      | 40      | 50      |
| C <sub>1</sub> (mg/L)                  | 20.25                                     | 24.87   | 26.39   | 31.68   | 35.24   |
| Q (mg/g)                               | 0.0769                                    | 0.0365  | -0.0271 | -0.0624 | -0.1107 |
| equation                               | C=-209.59Q+26.363 (r <sup>2</sup> =0.994) |         |         |         |         |
| L2 NH <sub>4</sub> <sup>+</sup> W=20g  |                                           |         |         |         |         |
| C <sub>0</sub> (mg/L)                  | 0.5                                       | 0.8     | 1.0     | 1.5     | 2.0     |
| C <sub>1</sub> (mg/L)                  | 1.96                                      | 2.06    | 2.23    | 2.47    | 2.85    |
| Q (mg/g)                               | 0.0110                                    | 0.0095  | 0.0092  | 0.0073  | 0.0064  |
| equation                               | C=-187.56Q+3.937 (r <sup>2</sup> =0.922)  |         |         |         |         |
| L2 PO <sub>4</sub> <sup>3-</sup> W=20g |                                           |         |         |         |         |
| C <sub>0</sub> (mg/L)                  | 0.5                                       | 1.0     | 1.5     | 2.0     | 3.0     |
| C <sub>1</sub> (mg/L)                  | 0.60                                      | 0.91    | 1.12    | 1.29    | 1.52    |
| Q (mg/g)                               | 0.0008                                    | -0.0007 | -0.0029 | -0.0053 | -0.0111 |
| equation                               | C=-204.71Q+0.814 (r <sup>2</sup> =0.985)  |         |         |         |         |
| L2 DOC W=20g                           |                                           |         |         |         |         |
| C <sub>0</sub> (mg/L)                  | 5                                         | 8       | 10      | 15      | 20      |
| C <sub>1</sub> (mg/L)                  | 8.35                                      | 9.97    | 11.88   | 13.22   | 16.02   |
| Q (mg/g)                               | 0.0251                                    | 0.0148  | 0.0141  | -0.0134 | -0.0299 |
| equation                               | C=-123.41Q+12.155 (r <sup>2</sup> =0.910) |         |         |         |         |
| T1 NO <sub>3</sub> <sup>-</sup> W=16g  |                                           |         |         |         |         |
| C <sub>0</sub> (mg/L)                  | 10                                        | 20      | 30      | 40      | 50      |
| C <sub>1</sub> (mg/L)                  | 27.85                                     | 32.67   | 36.26   | 42.12   | 45.65   |
| Q (mg/g)                               | 0.1673                                    | 0.1188  | 0.0587  | 0.0199  | -0.0408 |
| equation                               | C=-193.43Q+42.531 (r <sup>2</sup> =0.997) |         |         |         |         |
| T1 NH <sub>4</sub> <sup>+</sup> W=16g  |                                           |         |         |         |         |
| C <sub>0</sub> (mg/L)                  | 0.5                                       | 0.8     | 1.0     | 1.5     | 2.0     |
| C <sub>1</sub> (mg/L)                  | 1.68                                      | 1.95    | 2.02    | 2.27    | 2.51    |
| Q (mg/g)                               | 0.0111                                    | 0.0108  | 0.0096  | 0.0072  | 0.0048  |
| equation                               | C=-114.63Q+3.081 (r <sup>2</sup> =0.924)  |         |         |         |         |
| T1 PO <sub>4</sub> <sup>3-</sup> W=16g |                                           |         |         |         |         |

|                       |                                          |         |         |         |         |
|-----------------------|------------------------------------------|---------|---------|---------|---------|
| C <sub>0</sub> (mg/L) | 0.5                                      | 1.0     | 1.5     | 2.0     | 3.0     |
| C <sub>1</sub> (mg/L) | 0.63                                     | 0.91    | 1.13    | 1.27    | 1.72    |
| Q (mg/g)              | 0.0011                                   | -0.0008 | -0.0031 | -0.0061 | -0.0107 |
| equation              | C=-207.03Q+0.793 (r <sup>2</sup> =0.996) |         |         |         |         |

T1 DOC W=16g

|                       |                                           |        |        |         |         |
|-----------------------|-------------------------------------------|--------|--------|---------|---------|
| C <sub>0</sub> (mg/L) | 5                                         | 8      | 10     | 15      | 20      |
| C <sub>1</sub> (mg/L) | 8.64                                      | 10.13  | 11.17  | 14.28   | 16.15   |
| Q (mg/g)              | 0.0341                                    | 0.0200 | 0.0106 | -0.0068 | -0.0361 |
| equation              | C=-111.95Q+12.560 (r <sup>2</sup> =0.967) |        |        |         |         |

T2 NO<sub>3</sub><sup>-</sup> W=18g

|                       |                                           |        |        |         |         |
|-----------------------|-------------------------------------------|--------|--------|---------|---------|
| C <sub>0</sub> (mg/L) | 10                                        | 20     | 30     | 40      | 50      |
| C <sub>1</sub> (mg/L) | 20.82                                     | 27.45  | 31.28  | 35.68   | 40.35   |
| Q (mg/g)              | 0.0902                                    | 0.0621 | 0.0107 | -0.0360 | -0.0804 |
| equation              | C=-226.08Q+32.103 (r <sup>2</sup> =0.993) |        |        |         |         |

T2 NH<sub>4</sub><sup>+</sup> W=18g

|                       |                                          |        |        |        |         |
|-----------------------|------------------------------------------|--------|--------|--------|---------|
| C <sub>0</sub> (mg/L) | 0.5                                      | 0.8    | 1.0    | 1.5    | 2.0     |
| C <sub>1</sub> (mg/L) | 1.12                                     | 1.29   | 1.41   | 1.54   | 1.88    |
| Q (mg/g)              | 0.0052                                   | 0.0041 | 0.0034 | 0.0033 | -0.0010 |
| equation              | C=-104.96Q+1.700 (r <sup>2</sup> =0.916) |        |        |        |         |

T2 PO<sub>4</sub><sup>3-</sup> W=18g

|                       |                                          |         |         |         |         |
|-----------------------|------------------------------------------|---------|---------|---------|---------|
| C <sub>0</sub> (mg/L) | 0.5                                      | 1.0     | 1.5     | 2.0     | 3.0     |
| C <sub>1</sub> (mg/L) | 0.69                                     | 0.93    | 1.27    | 1.46    | 1.99    |
| Q (mg/g)              | 0.0018                                   | -0.0007 | -0.0022 | -0.0051 | -0.0095 |
| equation              | C=-221.45Q+0.911 (r <sup>2</sup> =0.995) |         |         |         |         |

T2 DOC W=18g

|                       |                                          |        |        |         |         |
|-----------------------|------------------------------------------|--------|--------|---------|---------|
| C <sub>0</sub> (mg/L) | 5                                        | 8      | 10     | 15      | 20      |
| C <sub>1</sub> (mg/L) | 8.62                                     | 11.02  | 11.56  | 13.14   | 15.53   |
| Q (mg/g)              | 0.0302                                   | 0.0252 | 0.0130 | -0.0155 | -0.0373 |
| equation              | C=-85.40Q+12.240 (r <sup>2</sup> =0.912) |        |        |         |         |

W1 NO<sub>3</sub><sup>-</sup> W=22g

|                       |                                           |        |        |         |         |
|-----------------------|-------------------------------------------|--------|--------|---------|---------|
| C <sub>0</sub> (mg/L) | 10                                        | 20     | 30     | 40      | 50      |
| C <sub>1</sub> (mg/L) | 26.12                                     | 29.32  | 33.68  | 37.75   | 43.65   |
| Q (mg/g)              | 0.1099                                    | 0.0635 | 0.0251 | -0.0153 | -0.0433 |
| equation              | C=-257.85Q+37.215 (r <sup>2</sup> =0.994) |        |        |         |         |

W1 NH<sub>4</sub><sup>+</sup> W=22g

|                       |                                          |        |        |        |        |
|-----------------------|------------------------------------------|--------|--------|--------|--------|
| C <sub>0</sub> (mg/L) | 0.5                                      | 0.8    | 1.0    | 1.5    | 2.0    |
| C <sub>1</sub> (mg/L) | 1.53                                     | 1.66   | 1.78   | 2.12   | 2.32   |
| Q (mg/g)              | 0.0070                                   | 0.0059 | 0.0053 | 0.0042 | 0.0022 |
| equation              | C=-175.08Q+2.744 (r <sup>2</sup> =0.954) |        |        |        |        |

W1 PO<sub>4</sub><sup>3-</sup> W=22g

|                       |                                          |         |         |         |         |
|-----------------------|------------------------------------------|---------|---------|---------|---------|
| C <sub>0</sub> (mg/L) | 0.5                                      | 1.0     | 1.5     | 2.0     | 3.0     |
| C <sub>1</sub> (mg/L) | 0.73                                     | 0.89    | 1.08    | 1.19    | 1.71    |
| Q (mg/g)              | 0.0016                                   | -0.0008 | -0.0029 | -0.0055 | -0.0088 |
| equation              | C=-236.71Q+0.825 (r <sup>2</sup> =0.992) |         |         |         |         |

W1 DOC W=22g

|                       |                                           |        |        |         |         |
|-----------------------|-------------------------------------------|--------|--------|---------|---------|
| C <sub>0</sub> (mg/L) | 5                                         | 8      | 10     | 15      | 20      |
| C <sub>1</sub> (mg/L) | 8.82                                      | 9.96   | 11.24  | 12.96   | 14.08   |
| Q (mg/g)              | 0.0260                                    | 0.0134 | 0.0085 | -0.0139 | -0.0404 |
| equation              | C=-225.99Q+11.310 (r <sup>2</sup> =0.992) |        |        |         |         |

W2 NO<sub>3</sub><sup>-</sup> W=17g

|                       |                                           |        |         |         |         |
|-----------------------|-------------------------------------------|--------|---------|---------|---------|
| C <sub>0</sub> (mg/L) | 10                                        | 20     | 30      | 40      | 50      |
| C <sub>1</sub> (mg/L) | 19.25                                     | 24.32  | 28.78   | 33.12   | 39.15   |
| Q (mg/g)              | 0.0816                                    | 0.0381 | -0.0108 | -0.0607 | -0.0957 |
| equation              | C=-219.84Q+27.913 (r <sup>2</sup> =0.997) |        |         |         |         |

W2 NH<sub>4</sub><sup>+</sup> W=17g

|                       |        |        |        |        |        |
|-----------------------|--------|--------|--------|--------|--------|
| C <sub>0</sub> (mg/L) | 0.5    | 0.8    | 1.0    | 1.5    | 2.0    |
| C <sub>1</sub> (mg/L) | 1.72   | 1.86   | 2.08   | 2.32   | 2.67   |
| Q (mg/g)              | 0.0108 | 0.0094 | 0.0095 | 0.0072 | 0.0059 |

|                |                              |         |         |         |         |
|----------------|------------------------------|---------|---------|---------|---------|
| equation       | C=-187.42Q+3.734 (r²=0.935)  |         |         |         |         |
| W2 PO₄³⁻ W=17g |                              |         |         |         |         |
| C₀ (mg/L)      | 0.5                          | 1.0     | 1.5     | 2.0     | 3.0     |
| C₁ (mg/L)      | 0.71                         | 0.87    | 1.10    | 1.21    | 1.72    |
| Q (mg/g)       | 0.0019                       | -0.0011 | -0.0035 | -0.0070 | -0.0113 |
| equation       | C=-187.69Q+0.808 (r²=0.994)  |         |         |         |         |
| W2 DOC W=17g   |                              |         |         |         |         |
| C₀ (mg/L)      | 5                            | 8       | 10      | 15      | 20      |
| C₁ (mg/L)      | 7.67                         | 9.12    | 10.23   | 12.47   | 14.78   |
| Q (mg/g)       | 0.0236                       | 0.0099  | 0.0020  | -0.0223 | -0.0461 |
| equation       | C=-214.75Q+10.186 (r²=0.999) |         |         |         |         |
| Spring flux    |                              |         |         |         |         |
| L1 NO₃⁻ W=21g  |                              |         |         |         |         |
| C₀ (mg/L)      | 10                           | 20      | 30      | 40      | 50      |
| C₁ (mg/L)      | 22.85                        | 29.81   | 34.46   | 40.22   | 46.32   |
| Q (mg/g)       | 0.0918                       | 0.0701  | 0.0319  | 0.0016  | -0.0026 |
| equation       | C=-326.49Q+41.036 (r²=0.995) |         |         |         |         |
| L1 NH₄⁺ W=21g  |                              |         |         |         |         |
| C₀ (mg/L)      | 0.5                          | 0.8     | 1.0     | 1.5     | 2.0     |
| C₁ (mg/L)      | 1.28                         | 1.49    | 1.66    | 1.96    | 2.03    |
| Q (mg/g)       | 0.0056                       | 0.0049  | 0.0047  | 0.0033  | 0.0002  |
| equation       | C=-267.45Q+2.161 (r²=0.930)  |         |         |         |         |
| L1 PO₄³⁻ W=21g |                              |         |         |         |         |
| C₀ (mg/L)      | 0.5                          | 1.0     | 1.5     | 2.0     | 3.0     |
| C₁ (mg/L)      | 0.66                         | 1.14    | 1.33    | 1.73    | 2.12    |
| Q (mg/g)       | 0.0011                       | 0.0010  | -0.0012 | -0.0019 | -0.0063 |
| equation       | C=-310.69Q+1.147 (r²=0.950)  |         |         |         |         |
| L1 DOC W=21g   |                              |         |         |         |         |
| C₀ (mg/L)      | 5                            | 8       | 10      | 15      | 20      |
| C₁ (mg/L)      | 6.97                         | 8.42    | 9.88    | 11.36   | 14.12   |
| Q (mg/g)       | 0.0141                       | 0.0030  | -0.0009 | -0.0260 | -0.0420 |
| equation       | C=-257.41Q+8.934 (r²=0.991)  |         |         |         |         |
| L2 NO₃⁻ W=18g  |                              |         |         |         |         |
| C₀ (mg/L)      | 10                           | 20      | 30      | 40      | 50      |
| C₁ (mg/L)      | 18.72                        | 22.14   | 26.77   | 31.65   | 36.85   |
| Q (mg/g)       | 0.0727                       | 0.0201  | -0.0269 | -0.0696 | -0.1096 |
| equation       | C=-219.51Q+25.024 (r²=0.997) |         |         |         |         |
| L2 NH₄⁺ W=18g  |                              |         |         |         |         |
| C₀ (mg/L)      | 0.5                          | 0.8     | 1.0     | 1.5     | 2.0     |
| C₁ (mg/L)      | 1.21                         | 1.44    | 1.57    | 1.78    | 2.01    |
| Q (mg/g)       | 0.0059                       | 0.0053  | 0.0048  | 0.0023  | 0.0008  |
| equation       | C=-242.13Q+2.052 (r²=0.981)  |         |         |         |         |
| L2 PO₄³⁻ W=18g |                              |         |         |         |         |
| C₀ (mg/L)      | 0.5                          | 1.0     | 1.5     | 2.0     | 3.0     |
| C₁ (mg/L)      | 0.66                         | 0.91    | 1.18    | 1.44    | 1.76    |
| Q (mg/g)       | 0.0013                       | -0.0008 | -0.0027 | -0.0047 | -0.0103 |
| equation       | C=-214.51Q+0.867 (r²=0.990)  |         |         |         |         |
| L2 DOC W=18g   |                              |         |         |         |         |
| C₀ (mg/L)      | 5                            | 8       | 10      | 15      | 20      |
| C₁ (mg/L)      | 5.92                         | 7.41    | 8.44    | 10.87   | 13.25   |
| Q (mg/g)       | 0.0077                       | -0.0049 | -0.0130 | -0.0344 | -0.0563 |
| equation       | C=-234.67Q+6.864 (r²=0.999)  |         |         |         |         |
| T1 NO₃⁻ W=23g  |                              |         |         |         |         |
| C₀ (mg/L)      | 10                           | 20      | 30      | 40      | 50      |
| C₁ (mg/L)      | 18.18                        | 22.16   | 26.32   | 28.14   | 33.87   |
| Q (mg/g)       | 0.05533                      | 0.0141  | -0.0240 | -0.0773 | -0.1052 |
| equation       | C=-243.18Q+23.234 (r²=0.994) |         |         |         |         |
| T1 NH₄⁺ W=23g  |                              |         |         |         |         |



|                       |                                          |        |        |        |        |
|-----------------------|------------------------------------------|--------|--------|--------|--------|
| C <sub>0</sub> (mg/L) | 0.5                                      | 0.8    | 1.0    | 1.5    | 2.0    |
| C <sub>1</sub> (mg/L) | 1.51                                     | 1.62   | 1.74   | 1.81   | 2.02   |
| Q (mg/g)              | 0.0066                                   | 0.0053 | 0.0048 | 0.0020 | 0.0001 |
| equation              | C=-224.40Q+2.009 (r <sup>2</sup> =0.993) |        |        |        |        |

T1 PO<sub>4</sub><sup>3-</sup> W=23g

|                       |                                          |         |         |         |         |
|-----------------------|------------------------------------------|---------|---------|---------|---------|
| C <sub>0</sub> (mg/L) | 0.5                                      | 1.0     | 1.5     | 2.0     | 3.0     |
| C <sub>1</sub> (mg/L) | 0.22                                     | 0.34    | 0.53    | 0.81    | 0.88    |
| Q (mg/g)              | -0.0018                                  | -0.0043 | -0.0063 | -0.0078 | -0.0138 |
| equation              | C=-211.54Q+0.160 (r <sup>2</sup> =0.986) |         |         |         |         |

T1 DOC W=23g

|                       |                                           |        |        |         |         |
|-----------------------|-------------------------------------------|--------|--------|---------|---------|
| C <sub>0</sub> (mg/L) | 5                                         | 8      | 10     | 15      | 20      |
| C <sub>1</sub> (mg/L) | 7.85                                      | 9.45   | 10.57  | 11.88   | 14.16   |
| Q (mg/g)              | 0.0186                                    | 0.0095 | 0.0037 | -0.0203 | -0.0381 |
| equation              | C=-254.15Q+10.244 (r <sup>2</sup> =0.993) |        |        |         |         |

T2 NO<sub>3</sub><sup>-</sup> W=16g

|                       |                                           |        |         |         |         |
|-----------------------|-------------------------------------------|--------|---------|---------|---------|
| C <sub>0</sub> (mg/L) | 10                                        | 20     | 30      | 40      | 50      |
| C <sub>1</sub> (mg/L) | 17.23                                     | 22.45  | 27.58   | 34.12   | 38.38   |
| Q (mg/g)              | 0.0678                                    | 0.0230 | -0.0227 | -0.0551 | -0.1089 |
| equation              | C=-230.77Q+25.569 (r <sup>2</sup> =0.996) |        |         |         |         |

T2 NH<sub>4</sub><sup>+</sup> W=16g

|                       |                                          |        |        |        |        |
|-----------------------|------------------------------------------|--------|--------|--------|--------|
| C <sub>0</sub> (mg/L) | 0.5                                      | 0.8    | 1.0    | 1.5    | 2.0    |
| C <sub>1</sub> (mg/L) | 1.63                                     | 1.77   | 1.91   | 2.02   | 2.15   |
| Q (mg/g)              | 0.0106                                   | 0.0091 | 0.0085 | 0.0049 | 0.0014 |
| equation              | C=-158.70Q+2.255 (r <sup>2</sup> =0.988) |        |        |        |        |

T2 PO<sub>4</sub><sup>3-</sup> W=16g

|                       |                                          |         |         |         |         |
|-----------------------|------------------------------------------|---------|---------|---------|---------|
| C <sub>0</sub> (mg/L) | 0.5                                      | 1.0     | 1.5     | 2.0     | 3.0     |
| C <sub>1</sub> (mg/L) | 0.41                                     | 0.61    | 0.88    | 1.37    | 1.74    |
| Q (mg/g)              | -0.0008                                  | -0.0037 | -0.0058 | -0.0059 | -0.0118 |
| equation              | C=-233.32Q+0.292 (r <sup>2</sup> =0.958) |         |         |         |         |

T2 DOC W=16g

|                       |                                          |        |         |         |         |
|-----------------------|------------------------------------------|--------|---------|---------|---------|
| C <sub>0</sub> (mg/L) | 5                                        | 8      | 10      | 15      | 20      |
| C <sub>1</sub> (mg/L) | 7.22                                     | 8.78   | 9.46    | 11.52   | 14.15   |
| Q (mg/g)              | 0.0208                                   | 0.0073 | -0.0051 | -0.0326 | -0.0548 |
| equation              | C=-193.67Q+9.105 (r <sup>2</sup> =0.997) |        |         |         |         |

W1 NO<sub>3</sub><sup>-</sup> W=22g

|                       |                                           |         |         |         |         |
|-----------------------|-------------------------------------------|---------|---------|---------|---------|
| C <sub>0</sub> (mg/L) | 10                                        | 20      | 30      | 40      | 50      |
| C <sub>1</sub> (mg/L) | 13.78                                     | 19.85   | 24.28   | 28.15   | 32.32   |
| Q (mg/g)              | 0.0258                                    | -0.0102 | -0.0390 | -0.0808 | -0.1205 |
| equation              | C=-266.97Q+18.489 (r <sup>2</sup> =0.994) |         |         |         |         |

W1 NH<sub>4</sub><sup>+</sup> W=22g

|                       |                                         |        |        |        |         |
|-----------------------|-----------------------------------------|--------|--------|--------|---------|
| C <sub>0</sub> (mg/L) | 0.5                                     | 0.8    | 1.0    | 1.5    | 2.0     |
| C <sub>1</sub> (mg/L) | 1.27                                    | 1.38   | 1.51   | 1.66   | 1.84    |
| Q (mg/g)              | 0.0053                                  | 0.0040 | 0.0035 | 0.0011 | -0.0011 |
| equation              | C=-234.8Q+1.756 (r <sup>2</sup> =0.996) |        |        |        |         |

W1 PO<sub>4</sub><sup>3-</sup> W=22g

|                       |                                          |         |         |         |         |
|-----------------------|------------------------------------------|---------|---------|---------|---------|
| C <sub>0</sub> (mg/L) | 0.5                                      | 1.0     | 1.5     | 2.0     | 3.0     |
| C <sub>1</sub> (mg/L) | 0.38                                     | 0.71    | 0.93    | 1.12    | 1.52    |
| Q (mg/g)              | -0.0008                                  | -0.0020 | -0.0039 | -0.0060 | -0.0101 |
| equation              | C=-261.24Q+0.410 (r <sup>2</sup> =0.992) |         |         |         |         |

W1 DOC W=22g

|                       |                                          |         |         |         |         |
|-----------------------|------------------------------------------|---------|---------|---------|---------|
| C <sub>0</sub> (mg/L) | 5                                        | 8       | 10      | 15      | 20      |
| C <sub>1</sub> (mg/L) | 6.68                                     | 7.81    | 8.32    | 10.67   | 13.15   |
| Q (mg/g)              | 0.0115                                   | -0.0013 | -0.0115 | -0.0295 | -0.0467 |
| equation              | C=-257.82Q+7.603 (r <sup>2</sup> =0.996) |         |         |         |         |

W2 NO<sub>3</sub><sup>-</sup> W=20g

|                       |        |         |         |         |         |
|-----------------------|--------|---------|---------|---------|---------|
| C <sub>0</sub> (mg/L) | 10     | 20      | 30      | 40      | 50      |
| C <sub>1</sub> (mg/L) | 12.76  | 17.68   | 22.43   | 26.65   | 30.36   |
| Q (mg/g)              | 0.0207 | -0.0174 | -0.0568 | -0.1001 | -0.1473 |

|                                        |                                           |         |         |         |         |
|----------------------------------------|-------------------------------------------|---------|---------|---------|---------|
| equation                               | C=-238.33Q+15.657 (r <sup>2</sup> =0.999) |         |         |         |         |
| W2 NH <sub>4</sub> <sup>+</sup> W=20g  |                                           |         |         |         |         |
| C <sub>0</sub> (mg/L)                  | 0.5                                       | 0.8     | 1.0     | 1.5     | 2.0     |
| C <sub>1</sub> (mg/L)                  | 0.96                                      | 1.12    | 1.27    | 1.45    | 1.66    |
| Q (mg/g)                               | 0.0035                                    | 0.0024  | 0.0020  | -0.0004 | -0.0026 |
| equation                               | C=-243.96Q+1.402 (r <sup>2</sup> =0.991)  |         |         |         |         |
| W2 PO <sub>4</sub> <sup>3-</sup> W=20g |                                           |         |         |         |         |
| C <sub>0</sub> (mg/L)                  | 0.5                                       | 1.0     | 1.5     | 2.0     | 3.0     |
| C <sub>1</sub> (mg/L)                  | 0.46                                      | 0.70    | 0.95    | 1.19    | 1.61    |
| Q (mg/g)                               | -0.0003                                   | -0.0023 | -0.0041 | -0.0061 | -0.0104 |
| equation                               | C=-247.48Q+0.453 (r <sup>2</sup> =0.999)  |         |         |         |         |
| W2 DOC W=20g                           |                                           |         |         |         |         |
| C <sub>0</sub> (mg/L)                  | 5                                         | 8       | 10      | 15      | 20      |
| C <sub>1</sub> (mg/L)                  | 6.33                                      | 7.83    | 8.67    | 11.22   | 13.69   |
| Q (mg/g)                               | 0.0010                                    | -0.0013 | -0.0010 | -0.0284 | -0.0473 |
| equation                               | C=-261.78Q+7.571 (r <sup>2</sup> =0.999)  |         |         |         |         |
| Summer flux                            |                                           |         |         |         |         |
| L1 NO <sub>3</sub> <sup>-</sup> W=24g  |                                           |         |         |         |         |
| C <sub>0</sub> (mg/L)                  | 10                                        | 20      | 30      | 40      | 50      |
| C <sub>1</sub> (mg/L)                  | 14.68                                     | 20.23   | 25.52   | 33.10   | 36.72   |
| Q (mg/g)                               | 0.0293                                    | 0.0014  | -0.0280 | -0.0431 | -0.0830 |
| equation                               | C=-366.42Q+20.954 (r <sup>2</sup> =0.986) |         |         |         |         |
| L1 NH <sub>4</sub> <sup>+</sup> W=24g  |                                           |         |         |         |         |
| C <sub>0</sub> (mg/L)                  | 0.5                                       | 0.8     | 1.0     | 1.5     | 2.0     |
| C <sub>1</sub> (mg/L)                  | 2.42                                      | 2.67    | 2.81    | 3.02    | 3.28    |
| Q (mg/g)                               | 0.0120                                    | 0.0117  | 0.0113  | 0.0095  | 0.0080  |
| equation                               | C=-344.63Q+4.779 (r <sup>2</sup> =0.973)  |         |         |         |         |
| L1 PO <sub>4</sub> <sup>3-</sup> W=24g |                                           |         |         |         |         |
| C <sub>0</sub> (mg/L)                  | 0.5                                       | 1.0     | 1.5     | 2.0     | 3.0     |
| C <sub>1</sub> (mg/L)                  | 0.64                                      | 0.92    | 1.28    | 1.62    | 2.01    |
| Q (mg/g)                               | 0.0009                                    | -0.0005 | -0.0014 | -0.0024 | -0.0062 |
| equation                               | C=-355.16Q+0.921 (r <sup>2</sup> =0.973)  |         |         |         |         |
| L1 DOC W=24g                           |                                           |         |         |         |         |
| C <sub>0</sub> (mg/L)                  | 5                                         | 8       | 10      | 15      | 20      |
| C <sub>1</sub> (mg/L)                  | 7.13                                      | 8.81    | 9.94    | 11.85   | 15.23   |
| Q (mg/g)                               | 0.0133                                    | 0.0051  | -0.0038 | -0.0197 | -0.0298 |
| equation                               | C=-330.11Q+9.520 (r <sup>2</sup> =0.989)  |         |         |         |         |
| L2 NO <sub>3</sub> <sup>-</sup> W=27g  |                                           |         |         |         |         |
| C <sub>0</sub> (mg/L)                  | 10                                        | 20      | 30      | 40      | 50      |
| C <sub>1</sub> (mg/L)                  | 17.12                                     | 20.86   | 24.22   | 28.79   | 30.84   |
| Q (mg/g)                               | 0.0396                                    | 0.0048  | -0.0321 | -0.0623 | -0.1064 |
| equation                               | C=-277.71Q+21.308 (r <sup>2</sup> =0.997) |         |         |         |         |
| L2 NH <sub>4</sub> <sup>+</sup> W=27g  |                                           |         |         |         |         |
| C <sub>0</sub> (mg/L)                  | 0.5                                       | 0.8     | 1.0     | 1.5     | 2.0     |
| C <sub>1</sub> (mg/L)                  | 2.31                                      | 2.54    | 2.81    | 2.96    | 3.18    |
| Q (mg/g)                               | 0.0100                                    | 0.0097  | 0.0100  | 0.0081  | 0.0066  |
| equation                               | C=-369.12Q+4.441 (r <sup>2</sup> =0.905)  |         |         |         |         |
| L2 PO <sub>4</sub> <sup>3-</sup> W=27g |                                           |         |         |         |         |
| C <sub>0</sub> (mg/L)                  | 0.5                                       | 1.0     | 1.5     | 2.0     | 3.0     |
| C <sub>1</sub> (mg/L)                  | 0.38                                      | 0.61    | 0.98    | 1.28    | 1.61    |
| Q (mg/g)                               | -0.0007                                   | -0.0022 | -0.0029 | -0.0040 | -0.0077 |
| equation                               | C=-357.06Q+0.354 (r <sup>2</sup> =0.974)  |         |         |         |         |
| L2 DOC W=27g                           |                                           |         |         |         |         |
| C <sub>0</sub> (mg/L)                  | 5                                         | 8       | 10      | 15      | 20      |
| C <sub>1</sub> (mg/L)                  | 5.38                                      | 6.78    | 8.04    | 10.53   | 13.03   |
| Q (mg/g)                               | 0.0021                                    | -0.0068 | -0.0109 | -0.0248 | -0.0387 |
| equation                               | C=-369.49Q+5.754 (r <sup>2</sup> =0.999)  |         |         |         |         |
| T1 NO <sub>3</sub> <sup>-</sup> W=17g  |                                           |         |         |         |         |

|                       |                                           |         |         |         |         |
|-----------------------|-------------------------------------------|---------|---------|---------|---------|
| C <sub>0</sub> (mg/L) | 10                                        | 20      | 30      | 40      | 50      |
| C <sub>1</sub> (mg/L) | 12.86                                     | 17.77   | 25.15   | 29.34   | 35.58   |
| Q (mg/g)              | 0.0252                                    | -0.0197 | -0.0428 | -0.0941 | -0.1272 |
| equation              | C=-261.18Q+16.496 (r <sup>2</sup> =0.991) |         |         |         |         |

T1 NH<sub>4</sub><sup>+</sup> W=17g

|                       |                                          |        |        |        |        |
|-----------------------|------------------------------------------|--------|--------|--------|--------|
| C <sub>0</sub> (mg/L) | 0.5                                      | 0.8    | 1.0    | 1.5    | 2.0    |
| C <sub>1</sub> (mg/L) | 2.93                                     | 3.18   | 3.28   | 3.50   | 3.81   |
| Q (mg/g)              | 0.0214                                   | 0.0210 | 0.0201 | 0.0176 | 0.0160 |
| equation              | C=-251.36Q+5.995 (r <sup>2</sup> =0.982) |        |        |        |        |

T1 PO<sub>4</sub><sup>3-</sup> W=17g

|                       |                                          |         |         |         |         |
|-----------------------|------------------------------------------|---------|---------|---------|---------|
| C <sub>0</sub> (mg/L) | 0.5                                      | 1.0     | 1.5     | 2.0     | 3.0     |
| C <sub>1</sub> (mg/L) | 0.30                                     | 0.52    | 0.79    | 1.19    | 1.54    |
| Q (mg/g)              | -0.0018                                  | -0.0042 | -0.0063 | -0.0071 | -0.0129 |
| equation              | C=-229.60Q+0.117 (r <sup>2</sup> =0.980) |         |         |         |         |

T1 DOC W=17g

|                       |                                           |        |        |         |         |
|-----------------------|-------------------------------------------|--------|--------|---------|---------|
| C <sub>0</sub> (mg/L) | 5                                         | 8      | 10     | 15      | 20      |
| C <sub>1</sub> (mg/L) | 7.55                                      | 9.18   | 10.62  | 13.66   | 16.85   |
| Q (mg/g)              | 0.0225                                    | 0.0104 | 0.0055 | -0.0118 | -0.0278 |
| equation              | C=-300.92Q+11.526 (r <sup>2</sup> =0.998) |        |        |         |         |

T2 NO<sub>3</sub><sup>-</sup> W=19g

|                       |                                           |        |         |         |         |
|-----------------------|-------------------------------------------|--------|---------|---------|---------|
| C <sub>0</sub> (mg/L) | 10                                        | 20     | 30      | 40      | 50      |
| C <sub>1</sub> (mg/L) | 17.78                                     | 22.58  | 28.66   | 33.41   | 37.68   |
| Q (mg/g)              | 0.0614                                    | 0.0204 | -0.0106 | -0.0520 | -0.0973 |
| equation              | C=-255.63Q+26.008 (r <sup>2</sup> =0.996) |        |         |         |         |

T2 NH<sub>4</sub><sup>+</sup> W=19g

|                       |                                          |        |        |        |        |
|-----------------------|------------------------------------------|--------|--------|--------|--------|
| C <sub>0</sub> (mg/L) | 0.5                                      | 0.8    | 1.0    | 1.5    | 2.0    |
| C <sub>1</sub> (mg/L) | 2.24                                     | 2.51   | 2.62   | 2.79   | 3.10   |
| Q (mg/g)              | 0.0137                                   | 0.0135 | 0.0128 | 0.0102 | 0.0087 |
| equation              | C=-261.59Q+4.241 (r <sup>2</sup> =0.966) |        |        |        |        |

T2 PO<sub>4</sub><sup>3-</sup> W=19g

|                       |                                          |         |         |         |         |
|-----------------------|------------------------------------------|---------|---------|---------|---------|
| C <sub>0</sub> (mg/L) | 0.5                                      | 1.0     | 1.5     | 2.0     | 3.0     |
| C <sub>1</sub> (mg/L) | 0.29                                     | 0.58    | 0.85    | 1.29    | 1.59    |
| Q (mg/g)              | -0.0017                                  | -0.0033 | -0.0051 | -0.0056 | -0.0111 |
| equation              | C=-263.12Q+0.188 (r <sup>2</sup> =0.960) |         |         |         |         |

T2 DOC W=19g

|                       |                                          |         |         |         |         |
|-----------------------|------------------------------------------|---------|---------|---------|---------|
| C <sub>0</sub> (mg/L) | 5                                        | 8       | 10      | 15      | 20      |
| C <sub>1</sub> (mg/L) | 6.06                                     | 7.73    | 8.98    | 11.65   | 13.87   |
| Q (mg/g)              | 0.0084                                   | -0.0021 | -0.0081 | -0.0264 | -0.0484 |
| equation              | C=-264.81Q+7.540 (r <sup>2</sup> =0.996) |         |         |         |         |

W1 NO<sub>3</sub><sup>-</sup> W=22g

|                       |                                           |        |         |         |         |
|-----------------------|-------------------------------------------|--------|---------|---------|---------|
| C <sub>0</sub> (mg/L) | 10                                        | 20     | 30      | 40      | 50      |
| C <sub>1</sub> (mg/L) | 14.48                                     | 20.52  | 24.48   | 29.67   | 36.18   |
| Q (mg/g)              | 0.0305                                    | 0.0035 | -0.0376 | -0.0704 | -0.0942 |
| equation              | C=-306.86Q+19.677 (r <sup>2</sup> =0.993) |        |         |         |         |

W1 NH<sub>4</sub><sup>+</sup> W=22g

|                       |                                          |        |        |        |        |
|-----------------------|------------------------------------------|--------|--------|--------|--------|
| C <sub>0</sub> (mg/L) | 0.5                                      | 0.8    | 1.0    | 1.5    | 2.0    |
| C <sub>1</sub> (mg/L) | 2.44                                     | 2.62   | 2.73   | 2.94   | 3.22   |
| Q (mg/g)              | 0.0132                                   | 0.0124 | 0.0118 | 0.0098 | 0.0083 |
| equation              | C=-295.54Q+4.445 (r <sup>2</sup> =0.996) |        |        |        |        |

W1 PO<sub>4</sub><sup>3-</sup> W=22g

|                       |                                          |         |         |         |         |
|-----------------------|------------------------------------------|---------|---------|---------|---------|
| C <sub>0</sub> (mg/L) | 0.5                                      | 1.0     | 1.5     | 2.0     | 3.0     |
| C <sub>1</sub> (mg/L) | 0.57                                     | 0.81    | 1.12    | 1.43    | 1.77    |
| Q (mg/g)              | 0.0005                                   | -0.0013 | -0.0026 | -0.0039 | -0.0084 |
| equation              | C=-284.92Q+0.706 (r <sup>2</sup> =0.984) |         |         |         |         |

W1 DOC W=22g

|                       |        |         |         |         |         |
|-----------------------|--------|---------|---------|---------|---------|
| C <sub>0</sub> (mg/L) | 5      | 8       | 10      | 15      | 20      |
| C <sub>1</sub> (mg/L) | 5.68   | 7.41    | 8.38    | 11.13   | 13.52   |
| Q (mg/g)              | 0.0046 | -0.0040 | -0.0110 | -0.0264 | -0.0442 |

|                                        |                                           |         |         |         |         |
|----------------------------------------|-------------------------------------------|---------|---------|---------|---------|
| equation                               | C=-307.06Q+6.626 (r <sup>2</sup> =0.999)  |         |         |         |         |
| W2 NO <sub>3</sub> <sup>-</sup> W=26g  |                                           |         |         |         |         |
| C <sub>0</sub> (mg/L)                  | 10                                        | 20      | 30      | 40      | 50      |
| C <sub>1</sub> (mg/L)                  | 16.06                                     | 20.83   | 24.13   | 29.21   | 35.06   |
| Q (mg/g)                               | 0.0350                                    | 0.0048  | -0.0339 | -0.0623 | -0.0862 |
| equation                               | C=-321.17Q+20.843 (r <sup>2</sup> =0.994) |         |         |         |         |
| W2 NH <sub>4</sub> <sup>+</sup> W=26g  |                                           |         |         |         |         |
| C <sub>0</sub> (mg/L)                  | 0.5                                       | 0.8     | 1.0     | 1.5     | 2.0     |
| C <sub>1</sub> (mg/L)                  | 2.08                                      | 2.24    | 2.36    | 2.57    | 2.86    |
| Q (mg/g)                               | 0.0091                                    | 0.0083  | 0.0078  | 0.0062  | 0.0050  |
| equation                               | C=-352.18Q+3.724 (r <sup>2</sup> =0.997)  |         |         |         |         |
| W2 PO <sub>4</sub> <sup>3-</sup> W=26g |                                           |         |         |         |         |
| C <sub>0</sub> (mg/L)                  | 0.5                                       | 1.0     | 1.5     | 2.0     | 3.0     |
| C <sub>1</sub> (mg/L)                  | 0.42                                      | 0.68    | 1.01    | 1.33    | 1.73    |
| Q (mg/g)                               | -0.0005                                   | -0.0018 | -0.0028 | -0.0039 | -0.0073 |
| equation                               | C=-367.91Q+0.399 (r <sup>2</sup> =0.985)  |         |         |         |         |
| W2 DOC W=26g                           |                                           |         |         |         |         |
| C <sub>0</sub> (mg/L)                  | 5                                         | 8       | 10      | 15      | 20      |
| C <sub>1</sub> (mg/L)                  | 5.37                                      | 6.94    | 7.98    | 10.45   | 12.94   |
| Q (mg/g)                               | 0.0021                                    | -0.0061 | -0.0117 | -0.0263 | -0.0407 |
| equation                               | C=-348.75Q+5.838 (r <sup>2</sup> =0.999)  |         |         |         |         |

Table S5. Sediment organic matter content measurement  
Autumn

| Sediment size | Crucible weight<br>$m_0$ | Total weight<br>$m_1$ | Dry weight<br>$m_2 (m_1 - m_0)$ | Ignition<br>weight $m_3$ | OM%<br>$(m_1 - m_3 / m_2)$ |
|---------------|--------------------------|-----------------------|---------------------------------|--------------------------|----------------------------|
| L1 coarse     | 29.2397                  | 55.2478               | 26.0081                         | 54.7006                  | 2.1                        |
| L1 fine       | 31.0121                  | 52.5894               | 21.5773                         | 52.0555                  | 2.5                        |
| L2 coarse     | 33.7833                  | 36.3698               | 2.5865                          | 35.9712                  | 15.4                       |
| L2 fine       | 29.4537                  | 37.7081               | 8.2544                          | 35.8361                  | 22.7                       |
| T1 coarse     | 29.5918                  | 59.4320               | 29.8402                         | 58.5251                  | 3.0                        |
| T1 fine       | 31.0968                  | 41.0526               | 9.9558                          | 40.6508                  | 4.0                        |
| T2 coarse     | 32.3422                  | 52.3133               | 19.9711                         | 51.4643                  | 4.3                        |
| T2 fine       | 30.1837                  | 55.6645               | 25.4808                         | 54.0686                  | 6.3                        |
| W1 coarse     | 33.7853                  | 41.2729               | 7.4876                          | 40.9651                  | 4.1                        |
| W1 fine       | 29.0825                  | 46.7741               | 17.6916                         | 46.0216                  | 4.3                        |
| W2 coarse     | 29.7306                  | 35.4428               | 5.7122                          | 35.0094                  | 7.6                        |
| W2 Fine       | 32.9723                  | 50.4953               | 17.5230                         | 48.5709                  | 11.0                       |

Winter

| Sediment size | Crucible weight<br>$m_0$ | Total weight<br>$m_1$ | Dry weight<br>$m_2 (m_1 - m_0)$ | Ignition<br>weight $m_3$ | OM%<br>$(m_1 - m_3 / m_2)$ |
|---------------|--------------------------|-----------------------|---------------------------------|--------------------------|----------------------------|
| L1 coarse     | 29.7814                  | 53.0849               | 23.3035                         | 52.8275                  | 1.1                        |
| L1 fine       | 33.0351                  | 49.9681               | 16.9330                         | 49.6415                  | 1.9                        |
| L2 coarse     | 33.8391                  | 39.1279               | 5.2888                          | 38.6246                  | 9.5                        |
| L2 fine       | 29.1409                  | 48.8611               | 19.7202                         | 46.5756                  | 11.6                       |
| T1 coarse     | 33.8376                  | 36.9002               | 3.0626                          | 36.7237                  | 5.8                        |
| T1 fine       | 31.1624                  | 32.6165               | 1.4541                          | 32.4978                  | 8.2                        |
| T2 coarse     | 32.3982                  | 39.5164               | 7.1182                          | 38.9577                  | 7.8                        |
| T2 fine       | 30.2666                  | 48.0082               | 17.7416                         | 46.4808                  | 8.6                        |
| W1 coarse     | 29.5166                  | 36.0717               | 6.5551                          | 35.8442                  | 3.5                        |
| W1 fine       | 29.3012                  | 50.2801               | 20.9789                         | 49.5157                  | 3.6                        |
| W2 coarse     | 29.6568                  | 40.3237               | 10.6669                         | 39.8146                  | 4.8                        |
| W2 Fine       | 31.0804                  | 51.8243               | 20.7439                         | 50.7594                  | 5.1                        |

Spring

| Sediment size | Crucible weight<br>$m_0$ | Total weight<br>$m_1$ | Dry weight<br>$m_2 (m_1 - m_0)$ | Ignition<br>weight $m_3$ | OM%<br>$(m_1 - m_3 / m_2)$ |
|---------------|--------------------------|-----------------------|---------------------------------|--------------------------|----------------------------|
| L1 coarse     | 31.1670                  | 54.4722               | 23.3052                         | 54.1116                  | 1.5                        |
| L1 fine       | 33.8433                  | 53.6765               | 19.8332                         | 53.1732                  | 2.5                        |
| L2 coarse     | 32.4041                  | 33.6609               | 1.2568                          | 33.5327                  | 10.2                       |
| L2 fine       | 30.2682                  | 39.9529               | 9.6847                          | 38.3058                  | 17.0                       |
| T1 coarse     | 29.3098                  | 30.1275               | 0.8177                          | 30.0464                  | 9.9                        |
| T1 fine       | 29.5200                  | 30.0978               | 0.5778                          | 30.0210                  | 13.3                       |
| T2 coarse     | 31.0825                  | 31.6164               | 0.5339                          | 31.5594                  | 10.7                       |
| T2 fine       | 29.6602                  | 30.2407               | 0.5805                          | 30.1565                  | 14.5                       |
| W1 coarse     | 33.8436                  | 35.0726               | 1.2290                          | 35.0222                  | 4.1                        |
| W1 fine       | 29.1478                  | 35.0944               | 5.9466                          | 34.8090                  | 4.8                        |
| W2 coarse     | 19.7863                  | 59.1538               | 39.3675                         | 56.7130                  | 6.2                        |
| W2 Fine       | 33.0392                  | 57.3977               | 24.3585                         | 55.2298                  | 8.9                        |

Summer

| Sediment size | Crucible weight<br>$m_0$ | Total weight<br>$m_1$ | Dry weight<br>$m_2 (m_1 - m_0)$ | Ignition<br>weight $m_3$ | OM%<br>$(m_1 - m_3 / m_2)$ |
|---------------|--------------------------|-----------------------|---------------------------------|--------------------------|----------------------------|
| L1 coarse     | 30.2657                  | 41.7547               | 11.4890                         | 41.3255                  | 3.7                        |
| L1 fine       | 31.0801                  | 38.3414               | 7.2613                          | 37.9264                  | 5.7                        |
| L2 coarse     | 29.5190                  | 34.8920               | 5.3730                          | 34.0646                  | 15.4                       |
| L2 fine       | 29.6601                  | 36.7211               | 7.0610                          | 35.3534                  | 19.4                       |
| T1 coarse     | 33.0376                  | 33.3671               | 0.3295                          | 33.3335                  | 10.2                       |
| T1 fine       | 29.3100                  | 30.2072               | 0.8972                          | 30.0493                  | 17.6                       |
| T2 coarse     | 32.4037                  | 36.6520               | 4.2483                          | 36.1125                  | 12.7                       |
| T2 fine       | 33.8420                  | 39.9904               | 6.1484                          | 38.8776                  | 18.1                       |
| W1 coarse     | 33.8426                  | 52.9995               | 19.1569                         | 52.0609                  | 4.9                        |

|           |         |         |         |         |     |
|-----------|---------|---------|---------|---------|-----|
| W1 fine   | 31.1631 | 50.5067 | 19.3436 | 49.4041 | 5.7 |
| W2 coarse | 29.7836 | 34.4887 | 4.7051  | 34.1514 | 7.2 |
| W2 fine   | 29.1498 | 37.6707 | 8.5209  | 36.8698 | 9.4 |

Table S6. DO measurement results and metabolic variables. Green boxes represent nighttime periods.

## Autumn measurement

### L1

| Time period | Day (d-1) | DO deficit   | dDO/dt (mg/(L·d)) | Average Temp (°C) | ER (mgO <sub>2</sub> /(L·d)) | Ea(eV)      | k (d-1)     | Corrected reaeration (m <sup>3</sup> /d) | Reaeration (m <sup>3</sup> /d) | GPP (mgO <sub>2</sub> /L) | Corrected GPP | NEP (mgO <sub>2</sub> /(L·d)) |
|-------------|-----------|--------------|-------------------|-------------------|------------------------------|-------------|-------------|------------------------------------------|--------------------------------|---------------------------|---------------|-------------------------------|
| 9:00-10:00  | 0.042     | 0.345229669  | 17.976            | 294.9664615       | 21.44594692                  | 0.564143064 | 3.02244247  | 1.04343681                               | 0.99943989                     | 35.6245601                | 40.0100787    | 18.56413173                   |
| 10:00-11:00 | 0.042     | -0.309392457 | 16.024            | 296.0802308       | 23.36531161                  | 0.566273222 | 3.103343278 | -0.960151                                | -0.89569116                    | 35.5676912                | 42.8934214    | 19.52810984                   |
| 11:00-12:00 | 0.042     | -0.825608814 | 24.119            | 297.0504615       | 25.1767886                   | 0.568128854 | 3.175580693 | -2.62178741                              | -2.39013752                    | 45.1571375                | 57.9418442    | 32.76505557                   |
| 12:00-13:00 | 0.042     | -1.151192733 | 7.405             | 297.3168462       | 25.69827117                  | 0.568638332 | 3.195706623 | -3.67887424                              | -3.33270296                    | 29.385703                 | 38.3527126    | 12.65444142                   |
| 13:00-14:00 | 0.042     | -1.474815543 | 1.452             | 297.5536154       | 26.17083771                  | 0.569091169 | 3.213702093 | -4.7396178                               | -4.269591                      | 24.369591                 | 32.2909107    | 6.120073011                   |
| 14:00-15:00 | 0.042     | -1.656704171 | -6.576            | 297.7344615       | 26.53763289                  | 0.569437049 | 3.2275154   | -5.34703822                              | -4.79615858                    | 16.8681586                | 22.6109866    | -3.926646304                  |
| 15:00-16:00 | 0.042     | -1.307704171 | -16.167           | 297.7403846       | 26.54973273                  | 0.569448378 | 3.227968816 | -4.22122828                              | -3.78580358                    | 6.26680358                | 8.40354109    | -18.14619164                  |
| 16:00-17:00 | 0.042     | -0.599200739 | -16.667           | 297.56            | 26.18370035                  | 0.56910338  | 3.214188751 | -1.92594427                              | -1.73468614                    | 3.71568614                | 4.925477      | -21.25822336                  |
| 17:00-18:00 | 0.042     | 0.245162851  | -17.524           | 297.0063077       | 25.0913799                   | 0.568044406 | 3.172257042 | 0.77771958                               | 0.70974645                     | 0.41425355                | 0.53003745    | -24.56134244                  |
| 18:00-19:00 | 0.042     | 0.91869013   | -14.976           | 298.3843846       | 27.89876971                  | 0.570680071 | 3.277649446 | 3.01114419                               | 0                              | 0                         | 0             | -27.89876971                  |
| 18:00-20:00 | 0.083     | 1.539758322  | -15.192           | 297.8531538       | 26.78115633                  | 0.569664056 | 3.236613556 | 4.98360266                               | 0                              | 0                         | 0             | -26.78115633                  |
| 18:00-21:00 | 0.125     | 2.115475757  | -12.816           | 297.4833846       | 26.02976506                  | 0.568956848 | 3.20835371  | 6.78719449                               | 0                              | 0                         | 0             | -26.02976506                  |
| 18:00-22:00 | 0.167     | 2.648577047  | -11.186           | 297.2683846       | 25.60260411                  | 0.568545646 | 3.192035782 | 8.4543527                                | 0                              | 0                         | 0             | -25.60260411                  |
| 18:00-23:00 | 0.208     | 3.180586524  | -9.212            | 297.2320769       | 25.53116319                  | 0.568476205 | 3.189288327 | 10.1438075                               | 0                              | 0                         | 0             | -25.53116319                  |
| 18:00-0:00  | 0.25      | 3.653719377  | -7.968            | 297.2166923       | 25.50095177                  | 0.568446781 | 3.188124865 | 11.6485136                               | 0                              | 0                         | 0             | -25.50095177                  |
| 18:00-1:00  | 0.292     | 3.95950605   | -7.233            | 297.1984615       | 25.46519752                  | 0.568411914 | 3.186746712 | 12.6179429                               | 0                              | 0                         | 0             | -25.46519752                  |
| 18:00-2:00  | 0.333     | 4.18829637   | -6.441            | 297.2430769       | 25.55278629                  | 0.568497243 | 3.190120463 | 13.36117                                 | 0                              | 0                         | 0             | -25.55278629                  |
| 18:00-3:00  | 0.375     | 4.374719907  | -5.867            | 297.238           | 25.54280412                  | 0.568487533 | 3.189736373 | 13.9542032                               | 0                              | 0                         | 0             | -25.54280412                  |
| 18:00-3:40  | 0.403     | 4.457370716  | -5.754            | 297.2548889       | 25.5760259                   | 0.568519835 | 3.191014265 | 14.2235335                               | 0                              | 0                         | 0             | -25.5760259                   |
| 3:40-4:40   | 0.042     | 4.148853918  | 7.833             | 295.2024615       | 21.83902438                  | 0.56459443  | 3.039406815 | 12.6100549                               | 0                              | 0                         | 0             | -21.83902438                  |
| 4:40-5:40   | 0.042     | 3.763614772  | 5.976             | 295.1148462       | 21.69225984                  | 0.56442686  | 3.03309769  | 11.4154113                               | 0                              | 0                         | 0             | -21.69225984                  |
| 5:40-6:40   | 0.042     | 3.34486377   | 7.69              | 295.0102308       | 21.51830995                  | 0.564226776 | 3.02581558  | 10.1201581                               | 9.68838061                     | 16.6546194                | 18.7572652    | -2.761044774                  |
| 6:40-7:40   | 0.042     | 2.808543187  | 8.452             | 294.9392308       | 21.40104954                  | 0.564090984 | 3.020491149 | 8.48317984                               | 8.13073253                     | 18.9692675                | 21.2674101    | -8.582039469                  |
| 7:40-8:40   | 0.042     | 2.243167491  | 15.786            | 294.8850769       | 21.31204121                  | 0.563987411 | 3.016614298 | 6.76677113                               | 6.49396989                     | 27.9400301                | 31.2167549    | 9.904713733                   |

### L2

| Time period | Day (d-1) | DO deficit | dDO/dt (mg/(L·d)) | Average Temp (°C) | ER (mgO <sub>2</sub> /(L·d)) | Ea(eV)    | k (d-1)     | Corrected reaeration (m <sup>3</sup> /d) | Reaeration (m <sup>3</sup> /d) | GPP (mgO <sub>2</sub> /L) | Corrected GPP | NEP (mgO <sub>2</sub> /(L·d)) |
|-------------|-----------|------------|-------------------|-------------------|------------------------------|-----------|-------------|------------------------------------------|--------------------------------|---------------------------|---------------|-------------------------------|
| 10:00-11:00 | 0.042     | -0.0800252 | 7.76190476        | 294.9874          | 17.2127636                   | 0.5641831 | 1.517771685 | -0.1214555                               | -0.1162766                     | 22.8211813                | 25.664878     | 8.4521147                     |
| 11:00-12:00 | 0.042     | -0.5764373 | 10.2619048        | 295.51231         | 17.9223515                   | 0.565187  | 1.53672898  | -0.8858279                               | -0.8375634                     | 26.0424681                | 30.286787     | 12.364435                     |
| 12:00-13:00 | 0.042     | -1.1245684 | 12.047619         | 295.81085         | 18.3388994                   | 0.565758  | 1.54764808  | -1.7404361                               | -1.6339978                     | 28.6246169                | 33.931053     | 15.592153                     |
| 13:00-14:00 | 0.042     | -1.6391465 | 11.0238095        | 295.87292         | 18.4267232                   | 0.5658767 | 1.54992829  | -2.5405595                               | -2.3816799                     | 28.3484894                | 33.737326     | 15.310603                     |
| 14:00-15:00 | 0.042     | -2.0424964 | 10.3333333        | 296.05392         | 18.6852026                   | 0.5662229 | 1.55659595  | -3.1793417                               | -2.9677473                     | 28.2440807                | 34.004174     | 15.318971                     |
| 15:00-16:00 | 0.042     | -2.0214716 | -1.4285714        | 295.97792         | 18.5762311                   | 0.5660776 | 1.55379278  | -3.140948                                | -2.9371983                     | 16.4516269                | 19.710793     | 1.1345616                     |
| 16:00-17:00 | 0.042     | -1.6327003 | -8.2619048        | 296.03215         | 18.653924                    | 0.5661813 | 1.5557925   | -2.5401429                               | -2.3723136                     | 9.05340881                | 10.884605     | -7.7693191                    |
| 17:00-18:00 | 0.042     | -1.2000818 | -9.8333333        | 295.85108         | 18.3957683                   | 0.565835  | 1.54912545  | -1.8590773                               | -1.7437189                     | 6.85338555                | 8.1447828     | -10.250985                    |
| 18:00-19:00 | 0.042     | -0.375906  | -19.02381         | 295.68808         | 18.1664413                   | 0.5655232 | 1.54314841  | -0.580079                                | 0                              | 0                         | 0             | -18.166441                    |
| 18:00-20:00 | 0.083     | 0.04830619 | -14.855422        | 295.67054         | 18.1419371                   | 0.5654897 | 1.54250667  | 0.0745126                                | 0                              | 0                         | 0             | -18.141937                    |
| 18:00-21:00 | 0.125     | 0.47227176 | -13.2             | 295.70192         | 18.18581                     | 0.5655497 | 1.54365524  | 0.7290248                                | 0                              | 0                         | 0             | -18.18581                     |
| 18:00-22:00 | 0.167     | 0.87923032 | -12.173653        | 295.58385         | 18.0212983                   | 0.5653239 | 1.53933847  | 1.3534331                                | 0                              | 0                         | 0             | -18.021298                    |
| 18:00-23:00 | 0.208     | 1.31630813 | -11.759615        | 295.44362         | 17.8278527                   | 0.5650557 | 1.53422747  | 2.0195161                                | 0                              | 0                         | 0             | -17.827853                    |
| 18:00-0:00  | 0.25      | 1.71829637 | -11.312           | 295.31331         | 17.6499575                   | 0.5648064 | 1.52949334  | 2.6281229                                | 0                              | 0                         | 0             | -17.649957                    |
| 18:00-1:00  | 0.292     | 2.13919811 | -11.058219        | 295.21692         | 17.519517                    | 0.5646221 | 1.52600105  | 3.2644186                                | 0                              | 0                         | 0             | -17.519517                    |
| 18:00-2:00  | 0.333     | 2.5841154  | -10.885886        | 294.95538         | 17.1704047                   | 0.5641219 | 1.51656489  | 3.9189787                                | 0                              | 0                         | 0             | -17.170405                    |
| 18:00-3:00  | 0.375     | 3.0623441  | -10.853333        | 294.72646         | 16.870543                    | 0.563684  | 1.50835338  | 4.6190971                                | 0                              | 0                         | 0             | -16.870543                    |
| 18:00-4:00  | 0.417     | 3.53612636 | -10.805755        | 294.56162         | 16.6578629                   | 0.5633688 | 1.50246786  | 5.3129162                                | 0                              | 0                         | 0             | -16.657863                    |
| 18:00-5:15  | 0.469     | 3.94745645 | -10.36887         | 294.30188         | 16.3281802                   | 0.562872  | 1.49324209  | 5.8945034                                | 0                              | 0                         | 0             | -16.32818                     |
| 5:15-6:00   | 0.031     | 3.73821333 | 5.61290323        | 294.2732          | 16.292186                    | 0.5628172 | 1.49222574  | 5.5782581                                | 0                              | 0                         | 0             | -16.292186                    |
| 6:00-6:40   | 0.028     | 3.53848127 | 7.5               | 294.30033         | 16.326243                    | 0.562869  | 1.4931863   | 5.2836118                                | 5.1414133                      | 17.3015867                | 18.621556     | 2.2953132                     |
| 6:40-7:40   | 0.042     | 3.0828227  | 10.5714286        | 294.30331         | 16.3299807                   | 0.5628747 | 1.49329164  | 4.6035534                                | 4.4793414                      | 21.0350872                | 22.644196     | 6.3142158                     |
| 7:40-8:40   | 0.042     | 2.56668526 | 11.9047619        | 294.37869         | 16.4249973                   | 0.5630189 | 1.49596383  | 3.8396683                                | 3.7293937                      | 23.1183682                | 25.007037     | 8.5820399                     |
| 8:40-9:40   | 0.042     | 2.03742298 | 11.9761905        | 294.48185         | 16.5559115                   | 0.5632162 | 1.49962811  | 3.0553768                                | 2.9603756                      | 23.9588149                | 26.087572     | 9.5316603                     |

### T1

| Time period | Day (d-1) | DO deficit  | dDO/dt (mg/(L·d)) | Average Temp (°C) | ER (mgO <sub>2</sub> /(L·d)) | Ea(eV)    | k (d-1)    | Corrected reaeration (m <sup>3</sup> /d) | Reaeration (m <sup>3</sup> /d) | GPP (mgO <sub>2</sub> /L) | Corrected GPP | NEP (mgO <sub>2</sub> /(L·d)) |
|-------------|-----------|-------------|-------------------|-------------------|------------------------------|-----------|------------|------------------------------------------|--------------------------------|---------------------------|---------------|-------------------------------|
| 12:00-13:00 | 0.042     | -1.48521822 | 9.619047619       | 295.213385        | 17.1420176                   | 0.5646153 | 1.1961248  | -1.77650636                              | -1.69166356                    | 25.9357112                | 29.5918386    | 12.449821                     |
| 13:00-14:00 | 0.042     | -1.81256413 | 7.761904762       | 295.28            | 17.2301268                   | 0.5647427 | 1.19801604 | -2.1714809                               | -2.06451055                    | 24.4514153                | 28.0173366    | 10.7872098                    |
| 14:00-15:00 | 0.042     | -1.36027728 | -7.523809524      | 294.883538        | 16.7123392                   | 0.5639845 | 1.18680426 | -1.61438287                              | -1.54935582                    | 8.6505463                 | 9.66410671    | -7.04823244                   |
| 15:00-16:00 | 0.042     | -1.00809194 | -9.214285714      | 294.699846        | 16.4777365                   | 0.5636331 | 1.18164514 | -1.19120694                              | -1.14821672                    | 6.55893101                | 7.24189893    | -9.23583756                   |
| 16:00-17:00 | 0.042     | -0.53462174 | -10.23809524      | 294.506538        | 16.2344091                   | 0.5632634 | 1.17624018 | -0.62884357                              | -0.60893416                    | 4.99583892                | 5.44831417    | -10.7860949                   |
| 17:00-18:00 | 0.042     | -0.04567294 | -11.04761905      | 294.313077        | 15.9944855                   | 0.5628934 | 1.17085568 | -0.05347642                              | -0.05202148                    | 3.62940243                | 10.018894     | -9.57559146                   |
| 18:00-19:00 | 0.042     | 0.611902272 | -14.3333333       | 294.083769        | 15.7146947                   | 0.5624549 | 1.1645054  | 0.7125635                                | 0                              | 0                         | 0             | -15.714695                    |
| 18:00-20:00 | 0.083     | 1.190156899 | -13.8795181       | 293.860692        | 15.447204                    | 0.5620282 | 1.15836072 | 1.378631008                              | 0                              | 0                         | 0             | -15.447204                    |
| 18:00-21:00 | 0.125     | 1.648586129 | -12.848           | 293.798           | 15.3728528                   | 0.5619083 | 1.1566397  | 1.906820171                              | 0                              | 0                         | 0             | -15.372853                    |
| 18:00-22:00 | 0.167     | 2.050919472 | -11.9281437       | 293.755462        | 15.3226074                   | 0.5618269 | 1.1554734  | 2.369782893                              | 0                              | 0                         | 0             | -15.322607                    |
| 18:00-23:00 | 0.208     | 2.441879066 | -11.3846154       | 293.656154        | 15.2059458                   | 0.561637  | 1.15275519 | 2.81488877                               | 0                              | 0                         | 0             | -15.205946                    |
| 18:00-0:00  | 0.25      | 2.792314585 | -10.808           | 293.59538         | 15.0932994                   | 0.5614522 | 1.15011681 | 3.211487954                              | 0                              | 0                         | 0             | -15.093299                    |
| 18:00-1:00  | 0.292     | 3.199883038 | -10.6130137       | 293.492385        | 15.015495                    | 0.5613238 | 1.14828653 | 3.674382594                              | 0                              | 0                         | 0             | -15.015495                    |
| 18:00-2:00  | 0.333     | 3.575410028 | -10.3573574       | 293.361077        | 14.8645189                   | 0.5610727 | 1.14741614 | 4.092829575                              | 0                              | 0                         | 0             | -14.864519                    |
| 18:00-3:00  | 0.375     | 3.919944751 | -10.08            | 293.261385        | 14.7509084                   | 0.560882  | 1.14201282 | 4.476627175                              | 0                              | 0                         | 0             | -14.750908                    |
| 18:00-4:00  | 0.417     | 4.265017653 | -9.88489209       | 293.231077        | 14.7165419                   | 0.560824  | 1.14119625 | 4.867205083                              | 0                              | 0                         | 0             | -14.716542                    |
| 18:00-5:00  | 0.458     | 4.611228782 | -9.72270742       | 293.173           | 14.6509107                   | 0.5607129 | 1.13926147 | 5.25505533                               | 0                              | 0                         | 0             | -14.650911                    |

| Time period | Day (d-1) | DO deficit   | dDO/dt (mg/(L·d)) | Average Temp (K) | ER (mgO <sub>2</sub> /(L·d)) | Ea(eV)      | k (d-1)     | Corrected reaserati | Reaeration (mgO <sub>2</sub> | GPP (mgO <sub>2</sub> /(L·d)) | Corrected GPP (m | NEP (mgO <sub>2</sub> /(L·d)) |
|-------------|-----------|--------------|-------------------|------------------|------------------------------|-------------|-------------|---------------------|------------------------------|-------------------------------|------------------|-------------------------------|
| 13:00-14:00 | 0.042     | -1.557026083 | 2.69047619        | 294.9032         | 12.97010276                  | 0.564022072 | 2.603140904 | -4.057829363        | -3.892565207                 | 17.9160414                    | 20.04038167      | 7.070278917                   |
| 14:00-15:00 | 0.042     | -1.372225999 | -4.261904762      | 294.8645385      | 12.93156845                  | 0.56394813  | 2.603752383 | -3.572936714        | -3.430564996                 | 10.50166023                   | 11.71787223      | -1.213696222                  |
| 15:00-16:00 | 0.042     | -1.087144834 | -6.547619048      | 294.8268462      | 12.89411041                  | 0.563876041 | 2.601425849 | -2.828126673        | -2.717862085                 | 7.503243038                   | 8.352059428      | -4.54205098                   |
| 16:00-17:00 | 0.042     | -0.75454602  | -7.404761905      | 294.7363077      | 12.80457739                  | 0.56370288  | 2.59584591  | -1.9586852          | -1.88636505                  | 5.814603145                   | 6.435044376      | -6.36953301                   |
| 17:00-18:00 | 0.042     | -0.35304624  | -8.214285714      | 294.5166923      | 12.58997531                  | 0.563282851 | 2.58236056  | -0.911692686        | -0.8826156                   | 4.001329886                   | 4.366564865      | -8.223410441                  |
| 18:00-19:00 | 0.042     | 0.159482796  | -10.52380952      | 294.1401538      | 12.23036868                  | 0.562562696 | 2.559402267 | 0                   | 0                            | 0                             | 0                | -12.23036868                  |
| 18:00-20:00 | 0.083     | 0.575196685  | -9.939759036      | 293.8373846      | 11.94867818                  | 0.561983629 | 2.541089961 | 1.461626522         | 0                            | 0                             | 0                | -11.94867818                  |
| 18:00-21:00 | 0.125     | 0.930375583  | -9.168            | 293.6431538      | 11.77139525                  | 0.56161215  | 2.529411402 | 2.353302608         | 0                            | 0                             | 0                | -11.77139525                  |
| 18:00-22:00 | 0.167     | 1.280529333  | -8.760479042      | 293.4517692      | 11.59928314                  | 0.561246114 | 2.517956475 | 3.224317125         | 0                            | 0                             | 0                | -11.59928314                  |
| 18:00-23:00 | 0.208     | 1.482273345  | -7.850961538      | 293.2667692      | 11.43530507                  | 0.560892289 | 2.506932997 | 3.715959959         | 0                            | 0                             | 0                | -11.43530507                  |
| 18:00-0:00  | 0.25      | 1.658486384  | -7.152            | 293.1413077      | 11.32542111                  | 0.560652336 | 2.499484675 | 4.145361299         | 0                            | 0                             | 0                | -11.32542111                  |
| 18:00-1:00  | 0.292     | 1.812687583  | -6.589041096      | 293.0471538      | 11.24365171                  | 0.56047226  | 2.493909547 | 4.520678869         | 0                            | 0                             | 0                | -11.24365171                  |
| 18:00-2:00  | 0.333     | 1.959890833  | -6.201201201      | 292.9580769      | 11.16683499                  | 0.560301895 | 2.488646487 | 4.877475436         | 0                            | 0                             | 0                | -11.16683499                  |
| 18:00-3:00  | 0.375     | 2.106456864  | -5.885333333      | 292.924          | 11.13758727                  | 0.56023672  | 2.48663601  | 5.237991491         | 0                            | 0                             | 0                | -11.13758727                  |
| 18:00-4:00  | 0.417     | 2.272137004  | -5.67146283       | 292.9106154      | 11.12612042                  | 0.560211121 | 2.485846786 | 5.648184467         | 0                            | 0                             | 0                | -11.12612042                  |
| 4:00-5:00   | 0.042     | 2.119179511  | 3.785714286       | 292.8636154      | 11.08594806                  | 0.560121231 | 2.483077414 | 5.262086779         |                              | 0                             | 0                | -11.08594806                  |
| 5:00-6:00   | 0.042     | 1.898246907  | 5.666666667       | 292.7984615      | 11.03049884                  | 0.55999662  | 2.479243468 | 4.706216244         |                              | 0                             | 0                | -11.03049884                  |
| 6:00-7:00   | 0.042     | 1.626316781  | 6.619047619       | 292.7403846      | 10.98130627                  | 0.559885544 | 2.475830952 | 4.026485424         | 4.065791953                  | 13.88625567                   | 13.5274326       | 2.546126333                   |
| 7:00-8:00   | 0.042     | 1.226456864  | 8.642857143       | 292.8107692      | 11.04095202                  | 0.560020159 | 2.479967255 | 3.041572863         | 3.066142161                  | 16.90971498                   | 16.54703516      | 5.506083139                   |
| 8:00-9:00   | 0.042     | 0.766645238  | 9.714285714       | 293.0588462      | 11.25377389                  | 0.560494623 | 2.494601206 | 1.912474135         | 1.916613095                  | 19.13067262                   | 19.0195424       | 7.765768513                   |
| 9:00-10:00  | 0.042     | 0.271484522  | 10.14285714       | 293.4033846      | 11.55617086                  | 0.561153575 | 2.515068739 | 0.682802235         | 0.678711306                  | 20.79714584                   | 21.13669039      | 9.580519533                   |
| 10:00-11:00 | 0.042     | -0.227079638 | 9.857142857       | 293.8142308      | 11.92740526                  | 0.561939344 | 2.539649458 | -0.576713013        | -0.567699096                 | 21.75784195                   | 22.70141914      | 10.77401388                   |
| 11:00-12:00 | 0.042     | -0.800784535 | 11.64285714       | 294.2814615      | 12.3641021                   | 0.562832956 | 2.567994052 | -2.056409923        | -2.001961338                 | 24.97781848                   | 26.85101546      | 14.48691337                   |
| 12:00-13:00 | 0.042     | -1.402156326 | 12.64285714       | 294.7643846      | 12.83227581                  | 0.563756579 | 2.597575026 | -3.642206256        | -3.505390816                 | 27.48124796                   | 30.46823207      | 17.63595627                   |

## W1

| Time period | Day (d-1) | DO deficit   | dDO/dt (mg/(L·d)) | Average Temp (K) | ER (mgO <sub>2</sub> /(L·d)) | Ea(eV)      | k (d-1)     | Corrected reaserati | Reaeration (mgO <sub>2</sub> | GPP (mgO <sub>2</sub> /(L·d)) | Corrected GPP (mg | NEP (mgO <sub>2</sub> /(L·d)) |
|-------------|-----------|--------------|-------------------|------------------|------------------------------|-------------|-------------|---------------------|------------------------------|-------------------------------|-------------------|-------------------------------|
| 13:00-14:00 | 0.042     | -0.579747373 | 0.5               | 295.9545385      | 9.038745221                  | 0.566032828 | 1.604232524 | -0.930049591        | -0.870200806                 | 8.654200806                   | 10.35316454       | 1.314419319                   |
| 14:00-15:00 | 0.042     | -0.431152122 | -3.666666667      | 296.0676154      | 9.117748326                  | 0.566249095 | 1.608540515 | -0.693525657        | -0.647159335                 | 4.264492669                   | 5.138687641       | -3.979060685                  |
| 15:00-16:00 | 0.042     | -0.22498246  | -5.952380952      | 296.2020769      | 9.212591407                  | 0.566506261 | 1.613678275 | -0.363049307        | -0.337698672                 | 1.669317719                   | 2.028878908       | -7.183712499                  |
| 16:00-17:00 | 0.042     | 0.063374914  | -5.857142857      | 296.2467692      | 9.244333286                  | 0.566591738 | 1.615389594 | 0.102375177         | 0.095125746                  | 1.331731397                   | 1.623208455       | -7.62112483                   |
| 17:00-18:00 | 0.042     | 0.373789995  | -6.404761905      | 295.9513077      | 9.036498076                  | 0.566026648 | 1.60109608  | 0.599600122         | 0.561058782                  | 0.318179313                   | 0.38056462        | -8.655933456                  |
| 18:00-19:00 | 0.042     | 0.690246922  | -6.452380952      | 295.6234615      | 8.811347127                  | 0.565399621 | 1.591685423 | 1.098684613         | 0                            | 0                             | 0                 | -8.811347127                  |
| 18:00-20:00 | 0.083     | 1.065215523  | -6.156626506      | 295.0742308      | 8.446658888                  | 0.56434918  | 1.571086822 | 1.673546071         | 0                            | 0                             | 0                 | -8.446658888                  |
| 18:00-21:00 | 0.125     | 1.224215523  | -5.36             | 294.7520769      | 8.239813168                  | 0.56373304  | 1.559128876 | 1.908709773         | 0                            | 0                             | 0                 | -8.239813168                  |
| 18:00-22:00 | 0.167     | 1.38175746   | -4.946107784      | 294.6946154      | 8.203454697                  | 0.56362314  | 1.557005561 | 2.15140405          | 0                            | 0                             | 0                 | -8.203454697                  |
| 18:00-23:00 | 0.208     | 1.549700094  | -4.653846154      | 294.4363077      | 8.041983374                  | 0.56312911  | 1.547496251 | 2.398155086         | 0                            | 0                             | 0                 | -8.041983374                  |
| 18:00-0:00  | 0.25      | 1.725436307  | -4.384            | 294.4363077      | 8.041983374                  | 0.56312911  | 1.547496251 | 2.670164442         | 0                            | 0                             | 0                 | -8.041983374                  |
| 18:00-1:00  | 0.292     | 1.888897709  | -4.253424658      | 294.2070769      | 7.901352145                  | 0.562690691 | 1.539106027 | 2.907213848         | 0                            | 0                             | 0                 | -7.901352145                  |
| 18:00-2:00  | 0.333     | 2.095032593  | -4.186186186      | 294.0146154      | 7.785179499                  | 0.562322595 | 1.53206307  | 3.210206307         | 0                            | 0                             | 0                 | -7.785179499                  |
| 18:00-3:00  | 0.396     | 2.247305842  | -3.888888889      | 293.8432308      | 7.683167704                  | 0.561994811 | 1.525881962 | 3.429123448         | 0                            | 0                             | 0                 | -7.683167704                  |
| 18:00-4:30  | 0.438     | 2.499393703  | -4                | 293.7202105      | 7.61076854                   | 0.561759526 | 1.521436517 | 3.802668851         | 0                            | 0                             | 0                 | -7.61076854                   |
| 4:30-5:00   | 0.021     | 2.444804758  | 3.380952381       | 293.6177143      | 7.550969308                  | 0.561563495 | 1.517742618 | 3.710584373         |                              | 0                             | 0                 | -7.550969308                  |
| 5:00-6:00   | 0.042     | 2.21887704   | 4.666666667       | 293.6746154      | 7.584108779                  | 0.561672322 | 1.519792188 | 3.372231993         |                              | 0                             | 0                 | -7.584108779                  |
| 6:00-7:00   | 0.042     | 1.947756487  | 6.666666667       | 293.6907692      | 7.593543334                  | 0.561703218 | 1.520374552 | 2.96133308          | 2.923595995                  | 11.02707067                   | 11.414885503      | 3.821311693                   |
| 7:00-8:00   | 0.042     | 1.576319297  | 8.738095238       | 293.6727692      | 7.583031291                  | 0.561668791 | 1.519725647 | 2.395572862         | 2.366055264                  | 13.65603997                   | 14.12002226       | 6.536991312                   |
| 8:00-9:00   | 0.042     | 1.144586129  | 9.928571429       | 293.7145385      | 7.607446952                  | 0.561748678 | 1.521231865 | 1.741180892         | 1.71802378                   | 15.49454765                   | 16.06382305       | 8.456376096                   |
| 9:00-10:00  | 0.042     | 0.620959506  | 11.0952381        | 293.9210769      | 7.729336656                  | 0.562143696 | 1.528701709 | 0.949261858         | 0.932060219                  | 17.44717788                   | 18.32855085       | 10.5992142                    |
| 10:00-11:00 | 0.042     | 0.065772561  | 11.14285714       | 294.3667692      | 7.999059631                  | 0.562996113 | 1.544946207 | 0.101615069         | 0.098724615                  | 18.32813253                   | 19.81035824       | 11.81129861                   |
| 11:00-12:00 | 0.042     | -0.555807181 | 11.88095238       | 294.9698462      | 8.379074079                  | 0.564149538 | 1.567202186 | -0.87106223         | -0.834266579                 | 19.99921896                   | 22.46605809       | 14.08698401                   |
| 12:00-13:00 | 0.042     | -1.292727756 | 11.0952381        | 296.5728462      | 9.479257264                  | 0.567215382 | 1.627930497 | -2.104470938        | -1.940384361                 | 20.31962246                   | 25.28857022       | 15.80931296                   |

## W2

| time period | Day (d-1) | DO deficit   | dDO/dt (mg/(L·d)) | Average Temp (K) | ER (mgO <sub>2</sub> /(L·d)) | Ea(eV)      | k (d-1)     | Corrected reaserati | Reaeration (mgO <sub>2</sub> GPP (mgO <sub>2</sub> /(L·d)) | Corrected GPP (m | NEP (mgO <sub>2</sub> /(L·d)) |              |
|-------------|-----------|--------------|-------------------|------------------|------------------------------|-------------|-------------|---------------------|------------------------------------------------------------|------------------|-------------------------------|--------------|
| 12:00-13:00 | 0.042     | -1.176126198 | 2.80952381        | 295.2365556      | 11.33686045                  | 0.564659637 | 1.871351421 | -2.200945431        | -2.101737516                                               | 14.56626133      | 16.64428129                   | 5.307420838  |
| 13:00-14:00 | 0.042     | -1.334914641 | 0.071428571       | 296.2902308      | 12.29449185                  | 0.566674861 | 1.918704792 | -2.561307119        | -2.385492464                                               | 12.11192104      | 14.80393123                   | 2.509439377  |
| 14:00-15:00 | 0.042     | -1.090395139 | -6.333333333      | 296.9303077      | 12.91529582                  | 0.567899051 | 1.948053701 | -2.124148286        | -1.948536113                                               | 5.270202779      | 6.710549745                   | -6.204746079 |
| 15:00-16:00 | 0.042     | -0.758698463 | -6.547619048      | 296.7316923      | 12.71937835                  | 0.567519186 | 1.938899037 | -1.47103972         | -1.355794154                                               | 4.463175106      | 5.611276799                   | -7.108101551 |
| 16:00-17:00 | 0.042     | -0.415712003 | -6.738095238      | 296.4423077      | 12.43923193                  | 0.566965719 | 1.925637549 | -0.800510643        | -0.74287735                                                | 3.659782112      | 4.516900133                   | -7.922331799 |
| 17:00-18:00 | 0.042     | -0.02176544  | -6.80952381       | 295.9214615      | 11.95046848                  | 0.56569566  | 1.901997112 | -0.041397805        | -0.038894842                                               | 2.884371032      | 3.443333997                   | -8.507134488 |
| 18:00-19:00 | 0.042     | 0.433086745  | -8.952380952      | 295.3317692      | 11.42023917                  | 0.56484174  | 1.875581965 | 0.812289687         | 0                                                          | 0                | 0                             | -11.42023917 |
| 18:00-20:00 | 0.083     | 0.778216898  | -7.602409639      | 294.8413077      | 10.99720024                  | 0.563903699 | 1.853891509 | 1.442729699         | 0                                                          | 0                | 0                             | -10.99720024 |
| 18:00-21:00 | 0.125     | 1.131199583  | -7.36             | 294.3570769      | 10.59491122                  | 0.562977576 | 1.832722702 | 2.073175155         | 0                                                          | 0                | 0                             | -10.59491122 |
| 18:00-22:00 | 0.167     | 1.47943196   | -7.19760479       | 294.0000769      | 10.30777764                  | 0.562294789 | 1.817270911 | 2.688528667         | 0                                                          | 0                | 0                             | -10.30777764 |
| 18:00-23:00 | 0.208     | 1.779053832  | -7.076923077      | 293.7160769      | 10.08492551                  | 0.56175162  | 1.805071824 | 3.211319945         | 0                                                          | 0                | 0                             | -10.08492551 |
| 18:00-0:00  | 0.25      | 1.936106115  | -6.492            | 293.6382308      | 10.02468613                  | 0.561602734 | 1.801742302 | 3.488364288         | 0                                                          | 0                | 0                             | -10.02468613 |
| 18:00-1:00  | 0.292     | 2.124450653  | -6.044520548      | 293.5094615      | 9.925829998                  | 0.561356455 | 1.796248249 | 3.816040764         | 0                                                          | 0                | 0                             | -9.925829998 |
| 18:00-2:00  | 0.333     | 2.376526521  | -5.993993994      | 293.3903846      | 9.835282409                  | 0.561128712 | 1.791182636 | 4.25679304          | 0                                                          | 0                | 0                             | -9.835282409 |
| 18:00-3:00  | 0.375     | 2.606485333  | -5.179292929      | 293.1765556      | 9.674752518                  | 0.56071975  | 1.778212037 | 4.645074951         | 0                                                          | 0                | 0                             | -9.674752518 |
| 18:00-4:00  | 0.416     | 2.693777281  | -5.047619048      | 293.108125       | 9.623934946                  | 0.560588872 | 1.779232114 | 4.792847218         | 0                                                          | 0                | 0                             | -9.623934946 |
| 18:00-5:00  | 0.458     | 2.85667734   | -3.166666667      | 293.0365385      | 9.571058427                  | 0.560451958 | 1.776213925 | 5.074077071         | 0                                                          | 0                | 0                             | -9.571058427 |
| 5:00-6:00   | 0.042     | 2.692929282  | 4.166666667       | 292.954          | 9.510453403                  | 0.560294097 | 1.772740342 | 4.773865263         | 0                                                          | 0                | 0                             | -9.510453403 |
| 6:00-7:00   | 0.042     | 2.123039134  | 6.738095238       | 292.8864615      | 9.461147931                  | 0.560164925 | 1.769903079 | 4.270845392         | 4.312100932                                                | 12.08099431      | 11.87921079                   | 2.418062876  |
| 7:00-8:00   | 0.042     | 2.126795953  | 6.523809524       | 292.9019231      | 9.472412794                  | 0.560194497 | 1.770552211 | 3.76560624          | 3.800583725                                                | 12.3782258       | 12.18351153                   | 2.711098739  |
| 8:00-9:00   | 0.042     | 1.751526521  | 7.595238095       | 293.0897692      | 9.610348563                  | 0.560553765 | 1.778457721 | 3.115015865         | 3.129977894                                                | 14.1202602       | 14.06600806                   | 4.45655948   |
| 9:00-10:00  | 0.042     | 1.330006931  | 7.047612195       | 293.532          | 9.94306212                   | 0.561399561 | 1.779208661 | 2.390304829         | 2.376727211                                                | 14.68033469      | 15.04593319                   | 5.102869272  |
| 10:00-11:00 | 0.042     | 0.924457846  | 6.904761905       | 294.2126923      | 10.47783237                  | 0.562710431 | 1.826457639 | 1.688483098         | 1.652066714                                                | 14.90775534      | 15.95547126                   | 5.477638891  |
| 11:00-12:00 | 0.042     | 0.524071561  | 5.333333333       | 294.825          | 10.98340678                  | 0.563877251 | 1.853174633 | 1.027000091         | 0.966894879                                                | 14.01238845      | 15.60574625                   | 7.946238764  |



| Time period | Day (d-1) | DO deficit  | dDO/dt (mg/L-d) | Average Temp (K | ER (mgO2/L-d)) | Ea(eV)      | k (d-1)     | Corrected reaera | Reaeration (mg | GPP (mgO2/L-d | Corrected GPP | NEP (mgO2/L-d) |
|-------------|-----------|-------------|-----------------|-----------------|----------------|-------------|-------------|------------------|----------------|---------------|---------------|----------------|
| 10:00-11:00 | 0.042     | 4.119053715 | 1.904761905     | 284.7777273     | 9.816103559    | 0.544656429 | 1.194608239 | 4.920655505      | 6.001461263    | 14.60030064   | 8.550094422   | -1.266009138   |
| 11:00-12:00 | 0.042     | 3.19147526  | 17.26190476     | 285.5108462     | 10.38586607    | 0.546058568 | 1.215560554 | 3.879431435      | 4.649979454    | 31.30892531   | 19.21439009   | 8.828524026    |
| 12:00-13:00 | 0.042     | 2.60508093  | 11.64285714     | 286.1594615     | 10.9174668     | 0.547299089 | 1.234403967 | 3.215722234      | 3.795602915    | 26.54425423   | 16.97980589   | 6.062339094    |
| 13:00-14:00 | 0.042     | 2.602502718 | -0.5            | 286.4264615     | 11.14412622    | 0.547809744 | 1.24222454  | 3.23294703       | 3.791846461    | 14.40515354   | 9.37762783    | -1.770853394   |
| 14:00-15:00 | 0.042     | 2.869528524 | -6.952380952    | 286.286         | 11.02430628    | 0.547541102 | 1.238114043 | 3.552803561      | 4.180903059    | 7.563715989   | 4.877640186   | -6.146666093   |
| 15:00-16:00 | 0.042     | 3.403051059 | -10.38095238    | 285.7753077     | 10.59941791    | 0.546564369 | 1.223208642 | 4.162641465      | 4.958245393    | 3.357802226   | 2.09581391    | -8.503596515   |
| 16:00-17:00 | 0.042     | 4.277982041 | -11.64285714    | 284.9811538     | 9.970993005    | 0.545045496 | 1.200385638 | 5.135228201      | 6.233019834    | 0.821123023   | 0.487151332   | -9.483841673   |
| 17:00-18:00 | 0.042     | 4.733748456 | -11.69047619    | 284.1312308     | 9.339654064    | 0.543419962 | 1.176431433 | 5.568930478      | 0              | 0             | 0             | -9.339654064   |
| 17:00-19:00 | 0.083     | 4.925962088 | -11.44578313    | 283.5528462     | 8.933034361    | 0.542313762 | 1.160404177 | 5.716106981      | 0              | 0             | 0             | -8.933034361   |
| 17:00-20:00 | 0.125     | 5.116681006 | -10.936         | 283.239         | 8.71985147     | 0.541713511 | 1.151798959 | 5.893387854      | 0              | 0             | 0             | -8.71985147    |
| 17:00-21:00 | 0.167     | 5.941091898 | -9.640718563    | 283.0230769     | 8.576145239    | 0.541300543 | 1.145915736 | 6.807990693      | 0              | 0             | 0             | -8.576145239   |
| 17:00-22:00 | 0.208     | 6.867096287 | -9.889423077    | 282.7041538     | 8.368209038    | 0.540690582 | 1.137281015 | 7.809818234      | 0              | 0             | 0             | -8.368209038   |
| 17:00-23:00 | 0.25      | 7.32784916  | -9.564          | 282.3145385     | 8.121011229    | 0.539945416 | 1.126820574 | 8.257171193      | 0              | 0             | 0             | -8.121011229   |
| 17:00-0:00  | 0.292     | 7.516720138 | -8.643835616    | 281.9650769     | 7.905508209    | 0.539277048 | 1.117520064 | 8.400085566      | 0              | 0             | 0             | -7.905508209   |
| 17:00-1:00  | 0.333     | 7.687296175 | -7.57957958     | 281.7657692     | 7.785171469    | 0.538895858 | 1.112250138 | 8.550196234      | 0              | 0             | 0             | -7.785171469   |
| 17:00-2:00  | 0.375     | 7.821679744 | -7.312          | 281.6263846     | 7.702104826    | 0.538629276 | 1.108579423 | 8.670953214      | 0              | 0             | 0             | -7.702104826   |
| 17:00-3:00  | 0.417     | 7.964971241 | -6.630695444    | 281.3736923     | 7.553765514    | 0.538145985 | 1.101955592 | 8.7770446        | 0              | 0             | 0             | -7.553765514   |
| 3:00-4:00   | 0.042     | 7.768861825 | -4.993736952    | 281.0181053     | 7.349849474    | 0.537465901 | 1.092701557 | 8.489047415      | 0              | 0             | 0             | -7.349849474   |
| 4:00-5:00   | 0.042     | 7.503268854 | 3.380952381     | 281.1064615     | 7.399998698    | 0.537634888 | 1.094993719 | 8.216032264      | 0              | 0             | 0             | -7.399998698   |
| 5:00-6:00   | 0.042     | 7.014308751 | 23.64285714     | 281.3715385     | 7.552513488    | 0.538141866 | 1.101899304 | 7.729061929      | 0              | 0             | 0             | -7.552513488   |
| 6:00-7:00   | 0.042     | 5.875189268 | 13.33333333     | 281.6722308     | 7.729328684    | 0.53871696  | 1.109785449 | 6.520199562      | 0              | 0             | 0             | -7.729328684   |
| 7:00-8:00   | 0.042     | 5.640231167 | 13.0952381      | 281.9209231     | 7.876868888    | 0.539192601 | 1.116350436 | 6.296474522      | 8.21781681     | 23.57442129   | 11.50146742   | 3.622777535    |
| 8:00-9:00   | 0.042     | 4.704027318 | 20.78571429     | 282.1334545     | 8.008618508    | 0.539599081 | 1.121991615 | 5.277879206      | 6.853767802    | 32.62894648   | 16.13669329   | 8.128074782    |
| 9:00-10:00  | 0.042     | 3.831533098 | 19.64285714     | 282.2211538     | 8.06285494     | 0.539766812 | 1.124327699 | 4.307898793      | 5.582543723    | 32.75731342   | 16.2912368    | 8.228381857    |

L2

| Time period | Day (d-1) | DO deficit  | dDO/dt (mg/L-d) | Average Temp (K | ER (mgO2/L-d)) | Ea(eV)      | k (d-1)     | Corrected reaer | Reaeration (mg | GPP (mgO2/L-d | Corrected GPP | NEP (mgO2/L-d) |
|-------------|-----------|-------------|-----------------|-----------------|----------------|-------------|-------------|-----------------|----------------|---------------|---------------|----------------|
| 11:00-12:00 | 0.042     | 3.613443525 | 5.5             | 284.4545385     | 7.609473385    | 0.544038309 | 1.379135144 | 4.983426958     | 6.124786774    | 14.23421323   | 8.165292774   | 0.55819389     |
| 12:00-13:00 | 0.042     | 3.411828084 | 5.404761905     | 284.5273846     | 7.652254306    | 0.544177632 | 1.381519877 | 4.713508316     | 5.783048602    | 14.4807133    | 8.345459522   | 0.693205216    |
| 13:00-14:00 | 0.042     | 3.29556937  | 0.619047619     | 284.5842308     | 7.685805793    | 0.544286354 | 1.383383689 | 4.559036913     | 5.585990081    | 9.892057538   | 5.721696585   | -1.96410921    |
| 14:00-15:00 | 0.042     | 3.521181013 | -3.928571429    | 284.7865385     | 7.80640878     | 0.544673281 | 1.390037163 | 4.894572465     | 5.968401817    | 4.962026754   | 2.907453568   | -4.89895521    |
| 15:00-16:00 | 0.042     | 3.81824802  | -3.833333333    | 284.3628462     | 7.555964366    | 0.543862942 | 1.376139304 | 5.254441173     | 6.471930394    | 4.553736273   | 2.596934806   | -4.95902956    |
| 16:00-17:00 | 0.042     | 4.132035458 | -3.785714286    | 283.7526154     | 7.209309942    | 0.542695834 | 1.356366648 | 5.604554389     | 7.003800101    | 4.069485613   | 2.232001022   | -4.97730892    |
| 17:00-18:00 | 0.042     | 4.424052757 | -7.738095238    | 283.4984615     | 7.069666401    | 0.542209748 | 1.348215373 | 5.964575938     | 0              | 0             | 0             | -7.0696664     |
| 17:00-19:00 | 0.083     | 4.846696403 | -7.56626506     | 283.342         | 6.985047904    | 0.541910505 | 1.34321788  | 6.51018821      | 0              | 0             | 0             | -6.9850479     |
| 17:00-20:00 | 0.125     | 5.090375207 | -6.288          | 282.8086923     | 6.704158031    | 0.540890518 | 1.326339433 | 6.751565366     | 0              | 0             | 0             | -6.70415803    |
| 17:00-21:00 | 0.167     | 5.18348072  | -5.628742515    | 282.9723077     | 6.789110598    | 0.541203444 | 1.331496144 | 6.901784591     | 0              | 0             | 0             | -6.7891106     |
| 17:00-22:00 | 0.208     | 5.339159332 | -5.235576923    | 282.908         | 6.755593031    | 0.541080451 | 1.32466954  | 7.098235893     | 0              | 0             | 0             | -6.75559303    |
| 17:00-23:00 | 0.25      | 5.477542236 | -4.964          | 283.0778462     | 6.844478684    | 0.541405293 | 1.334833061 | 7.31160447      | 0              | 0             | 0             | -6.84447868    |
| 17:00-0:00  | 0.292     | 5.684999011 | -4.794520548    | 282.9793077     | 6.792769062    | 0.541216832 | 1.331717212 | 7.570811031     | 0              | 0             | 0             | -6.79276906    |
| 17:00-1:00  | 0.333     | 5.882349638 | -4.678678679    | 282.8155385     | 6.707691296    | 0.540903612 | 1.326554804 | 7.803259173     | 0              | 0             | 0             | -6.7076913     |
| 17:00-2:00  | 0.375     | 6.077386209 | -4.562666667    | 282.6636923     | 6.629759868    | 0.540613196 | 1.321786123 | 8.033004755     | 0              | 0             | 0             | -6.62975987    |
| 17:00-3:00  | 0.417     | 6.249007071 | -4.460431655    | 282.6289231     | 6.612043166    | 0.540546698 | 1.32069662  | 8.253042518     | 0              | 0             | 0             | -6.61204317    |
| 17:00-4:30  | 0.479     | 6.633909037 | -4.317327766    | 282.2040556     | 6.39933745     | 0.53973411  | 1.30745556  | 8.673541517     | 0              | 0             | 0             | -6.39933745    |
| 4:30-5:00   | 0.021     | 6.61336677  | 5.18713867      | 281.8405        | 6.222768148    | 0.539038786 | 1.296230819 | 8.572449824     | 0              | 0             | 0             | -6.22276815    |
| 5:00-6:00   | 0.042     | 6.419159121 | 4.885564835     | 281.6605385     | 6.137176728    | 0.538694598 | 1.290710214 | 8.285274243     | 0              | 0             | 0             | -6.13717673    |
| 6:00-7:00   | 0.042     | 6.252260137 | 4.227482149     | 281.7884615     | 6.197896209    | 0.538939259 | 1.294632034 | 8.094376262     | 0              | 0             | 0             | -6.19789621    |
| 7:00-8:00   | 0.042     | 5.827731738 | 3.625858475     | 281.9084615     | 6.255400923    | 0.539168767 | 1.298321783 | 7.566271063     | 9.878005296    | 8.60685318    | 4.195760697   | -2.05964023    |
| 8:00-9:00   | 0.042     | 5.404003932 | 2.988301839     | 282.3425385     | 6.467904976    | 0.539989868 | 1.311756779 | 7.088738792     | 9.159786665    | 8.687515174   | 4.354222865   | -2.11368211    |
| 9:00-10:00  | 0.042     | 4.914408809 | 2.673696821     | 282.797         | 6.698127993    | 0.540868156 | 1.325971689 | 6.516366948     | 8.329922931    | 9.202773891   | 4.748412193   | -1.9497158     |
| 10:00-11:00 | 0.042     | 4.214123897 | 14.88095238     | 283.2303333     | 6.92527573     | 0.541696935 | 1.339669179 | 5.645531902     | 7.142940005    | 22.59701238   | 11.98695308   | 5.061677348    |

T1

| Time period | Day (d-1) | DO deficit  | dDO/dt (mg/L-d) | Average Temp (K | ER (mgO2/L-d)) | Ea(eV)      | k (d-1)     | Corrected reaer | Reaeration (mg | GPP (mgO2/L-d | Corrected GPP | NEP (mgO2/L-d) |
|-------------|-----------|-------------|-----------------|-----------------|----------------|-------------|-------------|-----------------|----------------|---------------|---------------|----------------|
| 11:00-12:00 | 0.042     | 1.830021447 | 4.357142857     | 287.9316923     | 8.910316121    | 0.550688598 | 1.582512842 | 2.896032441     | 3.277568412    | 14.39357444   | 10.31152796   | 1.401211836    |
| 12:00-13:00 | 0.042     | 1.639032496 | 3.666666667     | 287.8616154     | 8.862390419    | 0.550554571 | 1.579884919 | 2.589482723     | 2.935507201    | 14.04515947   | 10.01695909   | 1.154568674    |
| 13:00-14:00 | 0.042     | 1.580004059 | 1.976190476     | 287.8429231     | 8.849650333    | 0.550518821 | 1.579184685 | 2.495118212     | 2.829787269    | 12.46040321   | 8.876105907   | 0.026455574    |
| 14:00-15:00 | 0.042     | 1.770366969 | -3.595238095    | 287.7814615     | 8.807889058    | 0.550401272 | 1.576884457 | 2.791664157     | 3.170727242    | 6.548034663   | 4.646172701   | -4.161716357   |
| 15:00-16:00 | 0.042     | 2.131580089 | -6.30952381     | 287.4543077     | 8.588891168    | 0.549775568 | 1.564696828 | 3.335276604     | 3.81765994     | 3.18681625    | 2.214422706   | -6.374468974   |
| 16:00-17:00 | 0.042     | 2.43356146  | -6.095238095    | 287.1612308     | 8.397333358    | 0.549215039 | 1.553858695 | 3.781410636     | 4.358508576    | 2.860253329   | 1.950621498   | -6.44671186    |
| 17:00-18:00 | 0.042     | 2.847073824 | -8.78571429     | 286.9926154     | 8.289066709    | 0.548892551 | 1.547657267 | 4.406294494     | 0              | 0             | 0             | -8.289066709   |
| 17:00-19:00 | 0.083     | 3.202267516 | -7.78313253     | 286.6969231     | 8.102564323    | 0.54832702  | 1.536841832 | 4.921378676     | 0              | 0             | 0             | -8.102564323   |
| 17:00-20:00 | 0.125     | 3.477962932 | -7.152          | 286.424         | 7.934149386    | 0.547805036 | 1.526926307 | 5.310593095     | 0              | 0             | 0             | -7.934149386   |
| 17:00-21:00 | 0.167     | 3.685760982 | -6.47305389     | 286.2946923     | 7.855583052    | 0.547557726 | 1.52225081  | 5.610652641     | 0              | 0             | 0             | -7.855583052   |
| 17:00-22:00 | 0.208     | 3.858835556 | -5.98076923     | 286.2584615     | 7.833709387    | 0.547488433 | 1.520943351 | 5.869070279     | 0              | 0             | 0             | -7.833709387   |
| 17:00-23:00 | 0.25      | 4.071352947 | -5.58           | 286.1426154     | 7.764177271    | 0.547266869 | 1.516770342 | 6.175307401     | 0              | 0             | 0             | -7.764177271   |
| 17:00-0:00  | 0.292     | 4.24236779  | -5.37671233     | 286.0593846     | 7.714602573    | 0.547107685 | 1.513779274 | 6.421946352     | 0              | 0             | 0             | -7.714602573   |
| 17:00-1:00  | 0.333     | 4.406872175 | -5.15615616     | 285.9754615     | 7.664936007    | 0.546947176 | 1.510769299 | 6.657767187     | 0              | 0             | 0             | -7.664936007   |
| 17:00-2:00  | 0.375     | 4.583855812 | -4.984          | 285.8641538     | 7.599555871    | 0.546734293 | 1.506786382 | 6.906891513     | 0              | 0             | 0             | -7.599555871   |
| 17:00-3:00  | 0.417     | 4.788088658 | -4.86330935     | 285.783         | 7.552239359    | 0.546579081 | 1.503889078 | 7.200754237     | 0              | 0             | 0             | -7.55223935    |

| Time period | Day (d-1) | DO deficit  | dDO/dt (mg/(L·c | Average Temp (° | ER (mgO2/(L·d)) | Ea(eV)      | k (d-1)     | Corrected reaer | Reaeration (mg | GPP (mgO2/(L·d | Corrected GPP ( | NEP (mgO2/(L·d)) |
|-------------|-----------|-------------|-----------------|-----------------|-----------------|-------------|-------------|-----------------|----------------|----------------|-----------------|------------------|
| 12:00-13:00 | 0.042     | 1.696425852 | 4.738095238     | 288.2486923     | 7.792429769     | 0.551294882 | 1.325596782 | 2.24877665      | 2.525978094    | 13.57511714    | 9.924233755     | 2.131803986      |
| 13:00-14:00 | 0.042     | 1.859883839 | -4.761904762    | 288.1786154     | 7.750516816     | 0.551160855 | 1.323395495 | 2.461361892     | 2.769367036    | 3.831728202    | 2.788707439     | -4.961809377     |
| 14:00-15:00 | 0.042     | 2.150125482 | -6.476190476    | 288.162         | 7.740612275     | 0.551129077 | 1.322874101 | 2.844345314     | 3.201536843    | 1.685272681    | 1.225228933     | -6.515383342     |
| 15:00-16:00 | 0.042     | 2.441452408 | -5.880952381    | 288.0985385     | 7.702898786     | 0.551007703 | 1.320884558 | 3.224876785     | 3.635322636    | 1.846724983    | 1.337173535     | -6.365725251     |
| 16:00-17:00 | 0.042     | 2.786496239 | -5.952380952    | 287.7715385     | 7.511464574     | 0.550382293 | 1.310680316 | 3.652205771     | 4.149092901    | 1.261526147    | 0.894551192     | -6.616913382     |
| 17:00-18:00 | 0.042     | 3.111916352 | -6.666666667    | 287.4782308     | 7.343805714     | 0.549821323 | 1.301594547 | 4.050453356     | 0              | 0              | 0               | -7.343805714     |
| 17:00-19:00 | 0.083     | 3.404883897 | -6.373493976    | 287.3096154     | 7.249122176     | 0.549498835 | 1.296399902 | 4.414091149     | 0              | 0              | 0               | -7.249122176     |
| 17:00-20:00 | 0.125     | 3.734116991 | -6.248          | 287.0139231     | 7.086018339     | 0.548933303 | 1.287340319 | 4.80707936      | 0              | 0              | 0               | -7.086018339     |
| 17:00-21:00 | 0.167     | 3.909694343 | -5.508982036    | 286.7291538     | 6.932409597     | 0.548388663 | 1.278675255 | 4.999229411     | 0              | 0              | 0               | -6.932409597     |
| 17:00-22:00 | 0.208     | 4.062012482 | -5.100961538    | 286.6142308     | 6.871365562     | 0.548168865 | 1.275194873 | 5.179857492     | 0              | 0              | 0               | -6.871365562     |
| 17:00-23:00 | 0.25      | 4.211962611 | -4.804          | 286.5754615     | 6.850893885     | 0.548094716 | 1.274022907 | 5.366136849     | 0              | 0              | 0               | -6.850893885     |
| 17:00-0:00  | 0.292     | 4.410834109 | -4.616438356    | 286.4534615     | 6.786870188     | 0.547861383 | 1.270341956 | 5.603267631     | 0              | 0              | 0               | -6.786870188     |
| 17:00-1:00  | 0.333     | 4.56908093  | -4.501501502    | 286.3472308     | 6.731609448     | 0.54765821  | 1.267145453 | 5.789690127     | 0              | 0              | 0               | -6.731609448     |
| 17:00-2:00  | 0.375     | 4.73010919  | -4.368          | 286.2901538     | 6.702104362     | 0.547549046 | 1.265431322 | 5.985628324     | 0              | 0              | 0               | -6.702104362     |
| 17:00-3:15  | 0.427     | 4.954303309 | -4.2529274      | 286.16525       | 6.637987504     | 0.547310159 | 1.2616883   | 6.250786518     | 0              | 0              | 0               | -6.637987504     |
| 3:15-4:00   | 0.031     | 4.858413388 | 3.612903226     | 286.0862        | 6.597726108     | 0.547158971 | 1.259325113 | 6.118321989     | 0              | 0              | 0               | -6.597726108     |
| 4:00-5:00   | 0.042     | 4.683713011 | 4.476190476     | 285.8995385     | 6.503622922     | 0.546801968 | 1.253762449 | 5.872263495     | 0              | 0              | 0               | -6.503622922     |
| 5:00-6:00   | 0.042     | 4.497983921 | 4.846335667     | 285.8482308     | 6.477992745     | 0.546703839 | 1.252327748 | 5.632545256     | 0              | 0              | 0               | -6.477992745     |
| 6:00-7:00   | 0.042     | 4.150247469 | 4.4489266       | 285.7519231     | 6.430155751     | 0.546519644 | 1.249380796 | 5.185239486     | 0              | 0              | 0               | -6.430155751     |
| 7:00-8:00   | 0.042     | 4.001855143 | 3.719382007     | 285.6440769     | 6.377006639     | 0.546313381 | 1.246189293 | 4.98706903      | 9.123619699    | 5.647077279    | 0.729929359     | -0.729929359     |
| 8:00-9:00   | 0.042     | 3.607004011 | 3.062978789     | 285.6546154     | 6.382180813     | 0.546333537 | 1.246500799 | 4.496133382     | 5.370828973    | 9.055149816    | 5.608474053     | -0.77370676      |
| 9:00-10:00  | 0.042     | 3.151381815 | 2.26530285      | 285.8888462     | 6.49827335      | 0.546781519 | 1.253444555 | 3.950082376     | 4.692407523    | 8.935895326    | 5.618090609     | -0.88018274      |
| 10:00-11:00 | 0.042     | 2.710906423 | 1.824536803     | 286.1050769     | 6.607318169     | 0.547195074 | 1.257898903 | 3.415441272     | 4.036539664    | 9.150997139    | 5.833390469     | -0.7739277       |
| 11:00-12:00 | 0.042     | 2.282624325 | 1.697042037     | 286.125         | 6.617456946     | 0.547233179 | 1.260484479 | 2.877212533     | 3.39882762     | 9.661214417    | 6.166480434     | -0.450976512     |

## W1

| Time period | Day (d-1) | DO deficit | dDO/dt (mg/(L· | Average Temp (° | ER (mgO2/(L·d)) | Ea(eV)      | k (d-1)      | Corrected reaera | Reaeration (mg | GPP (mgO2/(L·d | Corrected GPP ( | NEP (mgO2/(L·d |
|-------------|-----------|------------|----------------|-----------------|-----------------|-------------|--------------|------------------|----------------|----------------|-----------------|----------------|
| 12:00-13:00 | 0.042     | 3.22963094 | 3.33333333     | 285.2041538     | 7.515887922     | 0.545471999 | 1.408842495  | 4.550041308      | 5.493602225    | 12.31673111    | 7.412095088     | -0.10379283    |
| 13:00-14:00 | 0.042     | 3.28344857 | 0.23809524     | 285.1546923     | 7.4852808       | 0.5453774   | 1.407190813  | 4.620438661      | 5.585146016    | 9.129949222    | 5.476977666     | -2.00830313    |
| 14:00-15:00 | 0.042     | 3.57449991 | -4.19047619    | 284.8304615     | 7.287708032     | 0.544757287 | 1.396411537  | 4.991472914      | 6.080224348    | 4.206299461    | 2.471570804     | -4.81613723    |
| 15:00-16:00 | 0.042     | 3.94405613 | -6.73809524    | 284.3597692     | 7.010131132     | 0.543857057 | 1.380909819  | 5.44638584       | 6.708839479    | 1.030065283    | 0.587316924     | -6.42281421    |
| 16:00-17:00 | 0.042     | 4.37778058 | -7.5           | 284.0096154     | 6.810518718     | 0.543187364 | 1.369489631  | 5.940545523      | 7.378564762    | -0.401564762   | -0.223894832    | -7.03441355    |
| 17:00-18:00 | 0.042     | 4.71969636 | -7.95238095    | 283.8155385     | 6.702339899     | 0.542816179 | 1.363200867  | 6.433892844      | 0              | 0              | 0               | -6.7023399     |
| 17:00-19:00 | 0.083     | 4.93301549 | -6.20481928    | 283.6459231     | 6.609204031     | 0.542491778 | 1.357727872  | 6.697692618      | 0              | 0              | 0               | -6.60920403    |
| 17:00-20:00 | 0.125     | 5.13752261 | -5.216         | 283.474         | 6.516121675     | 0.542162964 | 1.352203118  | 6.946974091      | 0              | 0              | 0               | -6.51612167    |
| 17:00-21:00 | 0.167     | 5.31773791 | -4.77245509    | 283.2743077     | 6.409648957     | 0.541781039 | 1.345814215  | 7.156687273      | 0              | 0              | 0               | -6.40964896    |
| 17:00-22:00 | 0.208     | 5.455676   | -4.5           | 283.1921538     | 6.366352578     | 0.541623914 | 1.343194578  | 7.328034427      | 0              | 0              | 0               | -6.36635258    |
| 17:00-23:00 | 0.25      | 5.66239486 | -4.348         | 283.0546154     | 6.294521304     | 0.541360863 | 1.338820303  | 7.580929207      | 0              | 0              | 0               | -6.2945213     |
| 17:00-0:00  | 0.292     | 5.82633244 | -4.23630137    | 282.9584615     | 6.244785597     | 0.541176962 | 1.335770689  | 7.782644091      | 0              | 0              | 0               | -6.2447856     |
| 17:00-1:00  | 0.333     | 5.99114172 | -4.15315315    | 282.8844615     | 6.206776758     | 0.541035432 | 1.333428436  | 7.988758736      | 0              | 0              | 0               | -6.20677676    |
| 17:00-2:00  | 0.375     | 6.18561998 | -4.12533333    | 282.802         | 6.164694263     | 0.540877719 | 1.330823197  | 8.231966559      | 0              | 0              | 0               | -6.16469426    |
| 17:00-3:00  | 0.417     | 6.35543919 | -4.05275779    | 282.6973077     | 6.111677587     | 0.540677488 | 1.3275252945 | 8.436991351      | 0              | 0              | 0               | -6.11167759    |
| 17:00-4:00  | 0.458     | 6.54182189 | -4.03275109    | 282.5973571     | 6.061487653     | 0.540486326 | 1.324379805  | 8.663856801      | 0              | 0              | 0               | -6.06148765    |
| 4:00-5:00   | 0.042     | 6.42177654 | 3.47619048     | 282.4924167     | 6.009235524     | 0.54028562  | 1.321087756  | 8.483730355      | 0              | 0              | 0               | -6.00923552    |
| 5:00-6:00   | 0.042     | 6.21845939 | 5.69047619     | 282.3732308     | 5.950436378     | 0.540057669 | 1.317358742  | 8.191941836      | 0              | 0              | 0               | -5.95043638    |
| 6:00-7:00   | 0.042     | 5.94079006 | 7.14285714     | 282.2668462     | 5.898438748     | 0.539854202 | 1.314039139  | 7.80643066       | 0              | 0              | 0               | -5.89843875    |
| 7:00-8:00   | 0.042     | 5.68984367 | 6.78571429     | 282.1568462     | 5.845151783     | 0.539643819 | 1.310615518  | 7.4571974        | 9.678424075    | 11.58429021    | 5.737599202     | -0.10755258    |
| 8:00-9:00   | 0.042     | 5.40284916 | 7.19047619     | 282.0606154     | 5.798929935     | 0.539459771 | 1.307627763  | 7.064915563      | 9.190246421    | 12.47722977    | 6.141972309     | 0.343042373    |
| 9:00-10:00  | 0.042     | 5.05758158 | 7.61904762     | 282.1073077     | 5.821311494     | 0.539549074 | 1.309076606  | 6.620761721      | 8.602946259    | 13.49310136    | 6.661890838     | 0.840579344    |
| 10:00-11:00 | 0.042     | 4.75575309 | 6.54761905     | 282.2038462     | 5.867860694     | 0.53973371  | 1.312077245  | 6.239915416      | 8.089536012    | 12.93508304    | 6.425909252     | 0.558048559    |
| 11:00-12:00 | 0.042     | 4.60386841 | 2.73809524     | 282.3083846     | 5.918687219     | 0.539933647 | 1.3153343    | 6.055626029      | 7.831180163    | 9.383915075    | 4.693006236     | -1.22568098    |

## W2

|             |       |             |             |             |             |             |             |             |              |             |             |              |
|-------------|-------|-------------|-------------|-------------|-------------|-------------|-------------|-------------|--------------|-------------|-------------|--------------|
| 12:00-13:00 | 0.042 | 3.686316376 | 4.5         | 285.2215385 | 8.876731677 | 0.545505248 | 1.524596832 | 5.620146268 | 6.782822132  | 14.05717787 | 8.468884507 | -0.40784717  |
| 13:00-14:00 | 0.042 | 3.722733629 | 0.142857143 | 285.0243077 | 8.743008474 | 0.545128031 | 1.517481987 | 5.649181224 | 6.849829877  | 9.633027266 | 5.730813627 | -3.012194847 |
| 14:00-15:00 | 0.042 | 4.016744938 | -3.95238095 | 284.7054615 | 8.531077032 | 0.544518216 | 1.506050182 | 6.049419447 | 7.390810686  | 4.996808361 | 2.912701041 | -5.618375991 |
| 15:00-16:00 | 0.042 | 4.343898079 | -3.33333333 | 284.0428462 | 8.106936455 | 0.54325092  | 1.482567697 | 6.440122972 | 7.992772466  | 5.013894201 | 2.801470361 | -5.305466093 |
| 16:00-17:00 | 0.042 | 4.805218175 | -5.78571429 | 283.2635385 | 7.635005937 | 0.541760442 | 1.455417853 | 6.993600318 | 8.841601441  | 1.712684273 | 0.910451411 | -6.724554526 |
| 17:00-18:00 | 0.042 | 5.178142226 | -7.4047619  | 282.6981538 | 7.309911212 | 0.540679106 | 1.436032473 | 7.435980388 | 0            | 0           | 0           | -7.309911212 |
| 17:00-19:00 | 0.083 | 5.450731301 | -6.75903614 | 282.5813077 | 7.244470774 | 0.54045563  | 1.423058471 | 7.805765932 | 0            | 0           | 0           | -7.244470774 |
| 17:00-20:00 | 0.125 | 5.629663012 | -5.76       | 282.4892308 | 7.193315486 | 0.540279527 | 1.428934633 | 8.044420447 | 0            | 0           | 0           | -7.193315486 |
| 17:00-21:00 | 0.167 | 5.788527676 | -5.18562874 | 282.4398462 | 7.166027803 | 0.540185076 | 1.427261999 | 8.261745582 | 0            | 0           | 0           | -7.166027803 |
| 17:00-22:00 | 0.208 | 5.97034356  | -4.86057692 | 282.3512308 | 7.117322252 | 0.540015593 | 1.424265545 | 8.503354624 | 0            | 0           | 0           | -7.117322252 |
| 17:00-23:00 | 0.25  | 6.159017297 | -4.624      | 282.2103846 | 7.040589481 | 0.539746215 | 1.419515892 | 8.742822931 | 0            | 0           | 0           | -7.040589481 |
| 17:00-0:00  | 0.292 | 6.336871586 | -4.46232877 | 282.0826154 | 6.971696858 | 0.539501848 | 1.415220925 | 8.968073269 | 0            | 0           | 0           | -6.971696858 |
| 17:00-1:00  | 0.333 | 6.513948536 | -4.34234234 | 281.95      | 6.900904077 | 0.539248212 | 1.410776798 | 9.189727461 | 0            | 0           | 0           | -6.900904077 |
| 17:00-2:00  | 0.375 | 6.681950398 | -4.24266667 | 281.8415385 | 6.843539823 | 0.539040772 | 1.407152477 | 9.402523053 | 0            | 0           | 0           | -6.843539823 |
| 17:00-3:20  | 0.431 | 6.933701729 | -4.15313225 | 281.7186471 | 6.779119766 | 0.538805734 | 1.403057221 | 9.728380281 | 0            | 0           | 0           | -6.779119766 |
| 3:20-4:00   | 0.028 | 6.848418668 | 3.714285714 | 281.5912222 | 6.712963565 | 0.538562026 | 1.398823478 | 9.579728823 |              | 0           | 0           | -6.712963565 |
| 4:00-5:00   | 0.042 | 6.676721925 | 5.119047619 | 281.4820769 | 6.65681127  | 0.538533278 | 1.39520724  | 9.31541077  |              | 0           | 0           | -6.65681127  |
| 5:00-6:00   | 0.042 | 6.416391804 | 7.023809524 | 281.335     | 6.581886382 | 0.538071983 | 1.390349021 | 8.921024061 | 0            | 0           | 0           | -6.581886382 |
| 6:00-7:00   | 0.042 | 6.131715802 | 8           | 281.2016923 | 6.514704741 | 0.537817024 | 1.385960241 | 8.498314311 | 11.28235708  | 13.05764292 | 6.08433567  | -0.430369071 |
| 7:00-8:00   | 0.042 | 5.803899045 | 8.738095238 | 281.036923  | 6.429530713 | 0.537489975 | 1.380350825 | 8.011416838 | 10.671921424 | 14.39892099 | 6.636389148 | 0.206858345  |
| 8:00-9:00   | 0.042 | 5.345774843 | 9.5         | 281.0204615 | 6.424470282 | 0.537470408 | 1.38001594  | 7.377254945 | 9.836225711  | 16.00377429 | 6.71236336  | 0.946766055  |
| 9:00-10:00  | 0.042 | 4.853030283 | 9.69047619  | 281.3148462 | 6.571685388 | 0.538033438 | 1.389684622 | 6.744181552 | 8.929575721  | 17.10090047 | 8.026166993 | 1.454481606  |
| 10:00-11:00 | 0.042 | 4.283736485 | 9.686666667 | 281.6963846 | 6.767514768 | 0.538763165 | 1.40231662  | 6.007154867 | 7.882075132  | 18.12595154 | 8.71661534  | 1.949100572  |
| 11:00-12:00 | 0.042 | 3.669275194 | 9.866952381 | 282.4624615 | 7.17851116  | 0.540228329 | 1.428027728 | 5.23982672  | 6.751466358  | 19.46948602 | 9.833277469 | 6.254766309  |

| Time period | Day (d-1) | DO deficit  | dDO/dt (mg/L) | Average Temp | ER (mgO2/(L·d)) | Ea(eV)       | k (d-1)     | Corrected reae | Reaeration (m | GPP (mgO2/(L·c | Corrected GPP | NEP (mgO2/(L·c |
|-------------|-----------|-------------|---------------|--------------|-----------------|--------------|-------------|----------------|---------------|----------------|---------------|----------------|
| 10:00-11:00 | 0.042     | 1.72123454  | 11.42857143   | 290.990385   | 21.52239358     | 0.556538552  | 4.752255069 | 8.179745545    | 8.60961515    | 28.23295628    | 24.5929977    | 3.07060413     |
| 11:00-12:00 | 0.042     | 1.20835782  | 11            | 291.318077   | 22.07208076     | 0.557165285  | 4.78933217  | 5.787226987    | 30.36979418   | 27.0142419     | 4.94216116    | 4.94216116     |
| 12:00-13:00 | 0.042     | 0.72236611  | 9.30952381    | 291.578385   | 22.51872189     | 0.5576663141 | 4.818991021 | 3.481075788    | 3.61327527    | 31.11024854    | 28.1371322    | 5.61841029     |
| 13:00-14:00 | 0.042     | 0.45447262  | 2.714285714   | 292.349      | 23.89464581     | 0.559136994  | 4.907874199 | 2.230494452    | 2.27327205    | 25.85501366    | 24.5646879    | 0.67004208     |
| 14:00-15:00 | 0.042     | 0.62540408  | -3.47619048   | 292.643308   | 24.44204086     | 0.559699877  | 4.94225078  | 3.09090378     | 3.12827119    | 18.80953834    | 18.2101605    | -6.2318803     |
| 15:00-16:00 | 0.042     | 0.92343428  | -6.42857143   | 292.483      | 24.14234105     | 0.559393278  | 4.923496305 | 4.546525242    | 4.61901824    | 14.36641033    | 13.7668383    | -10.375503     |
| 16:00-17:00 | 0.042     | 1.37374948  | -10.5         | 292.425077   | 24.03495835     | 0.559282497  | 4.916737373 | 6.754365392    | 6.87149488    | 8.042505119    | 7.67837834    | -16.35658      |
| 17:00-18:00 | 0.042     | 1.99637255  | -13.4761905   | 292.228846   | 23.67470655     | 0.558907192  | 4.893908472 | 9.770064525    | 9.98585548    | 1.951954039    | 1.84035214    | -21.834354     |
| 18:00-19:00 | 0.042     | 2.53982297  | -11.952381    | 291.956231   | 23.18316759     | 0.558385797  | 4.862369024 | 12.34955655    | 0             | 0              | 0             | -23.183168     |
| 18:00-20:00 | 0.083     | 3.02015809  | -11.373494    | 291.723385   | 22.77142358     | 0.557940463  | 4.835591559 | 14.60425097    | 0             | 0              | 0             | -22.771424     |
| 18:00-21:00 | 0.125     | 3.30379529  | -9.6          | 291.566154   | 22.49753515     | 0.557639749  | 4.817593372 | 15.91634227    | 0             | 0              | 0             | -22.497535     |
| 18:00-22:00 | 0.167     | 3.46898425  | -0.7784431    | 291.457308   | 22.3098624      | 0.557431573  | 4.805173021 | 16.66906953    | 0             | 0              | 0             | -22.309862     |
| 18:00-23:00 | 0.208     | 3.57814931  | -7.05769231   | 291.453615   | 22.30352365     | 0.557424511  | 4.804752256 | 17.19212096    | 0             | 0              | 0             | -22.303524     |
| 18:00-0:00  | 0.25      | 3.71352865  | -6.368        | 291.435462   | 22.27238429     | 0.557389791  | 4.802684034 | 17.83490477    | 0             | 0              | 0             | -22.272384     |
| 18:00-1:00  | 0.292     | 3.83164418  | -5.82876712   | 291.404385   | 22.2191788      | 0.557330354  | 4.799145584 | 18.38861825    | 0             | 0              | 0             | -22.219179     |
| 18:00-2:00  | 0.333     | 3.96664418  | -5.51651652   | 291.365462   | 22.1527195      | 0.557255911  | 4.79471744  | 19.01893804    | 0             | 0              | 0             | -22.152719     |
| 18:00-3:00  | 0.375     | 4.08322304  | -5.192        | 291.330923   | 22.09391319     | 0.557189854  | 4.79079154  | 19.56187041    | 0             | 0              | 0             | -22.093913     |
| 18:00-3:30  | 0.396     | 4.11806567  | -4.99242424   | 291.294833   | 22.0326324      | 0.55712083   | 4.786692744 | 19.71191506    | 0             | 0              | 0             | -22.032632     |
| 3:30-4:30   | 0.042     | 4.00847874  | 3.428571429   | 291.196786   | 21.86700322     | 0.556933308  | 4.775574944 | 19.14279063    | 0             | 0              | 0             | -21.867003     |
| 4:30-5:30   | 0.042     | 3.89445495  | 3.619047619   | 291.006308   | 21.5487845      | 0.556569006  | 4.734050005 | 18.51443373    | 0             | 0              | 0             | -21.548785     |
| 5:30-6:30   | 0.042     | 3.73785044  | 4.761904762   | 290.804846   | 21.21725407     | 0.556183697  | 4.73138953  | 17.68522643    | 0             | 0              | 0             | -21.217254     |
| 6:30-7:30   | 0.042     | 3.446636304 | 7.69047619    | 290.643846   | 20.95597889     | 0.555875774  | 4.713357825 | 16.24521482    | 17.2400585    | 15.86441772    | 13.5163775    | -7.4396014     |
| 7:30-8:30   | 0.042     | 3.10281551  | 8.30952381    | 290.540385   | 20.7897793      | 0.555677897  | 4.701806609 | 14.58883849    | 15.5202832    | 18.20324061    | 15.4068226    | -5.3829567     |
| 8:30-9:30   | 0.042     | 2.76539475  | 8.476190476   | 290.457692   | 20.65789148     | 0.555519742  | 4.692687172 | 12.97687172    | 13.8324995    | 20.05769095    | 16.8869027    | -3.7709888     |
| 9:30-10:00  | 0.021     | 2.57465946  | 7.666666667   | 290.499      | 20.72366913     | 0.555598746  | 4.697194053 | 12.09367512    | 12.8784466    | 20.20222003    | 17.053548     | -3.6701212     |

## L2

| Time period | Day (d-1) | DO deficit   | dDO/dt (mg/L) | Average Temp | ER (mgO2/(L·d)) | Ea(eV)      | k (d-1)     | Corrected reae | Reaeration (mg | GPP (mgO2/(L·c | Corrected GPP | NEP (mgO2/(L·c |
|-------------|-----------|--------------|---------------|--------------|-----------------|-------------|-------------|----------------|----------------|----------------|---------------|----------------|
| 11:00-12:00 | 0.042     | 0.845436238  | 2.928571429   | 295.364462   | 13.44947289     | 0.564904266 | 1.444928352 | 1.22159479     | 1.159093083    | 13.11147835    | 15.1049372    | 1.655464316    |
| 12:00-13:00 | 0.042     | 0.561399099  | 6.428571429   | 295.379462   | 13.46500814     | 0.564932954 | 1.445442473 | 0.811470102    | 0.769678164    | 17.00089326    | 19.6044815    | 6.139473382    |
| 13:00-14:00 | 0.042     | 0.107158407  | 9.952380952   | 295.584692   | 13.67937336     | 0.565325472 | 1.452495113 | 0.155647062    | 0.146914176    | 21.14746678    | 24.7080575    | 11.02686418    |
| 14:00-15:00 | 0.042     | -0.310290018 | 8.357142857   | 296.015154   | 14.1401444      | 0.556487859 | 1.467399664 | -0.455319468   | -0.425407615   | 20.12455047    | 24.1687868    | 10.02864236    |
| 15:00-16:00 | 0.042     | -0.472733188 | 4             | 296.170231   | 14.30991644     | 0.566445353 | 1.472806529 | -0.696244526   | -0.648117201   | 15.9901172     | 19.3947779    | 5.084861463    |
| 16:00-17:00 | 0.042     | -0.299333613 | -4            | 296.116462   | 14.25082241     | 0.566342516 | 1.470929575 | -0.440298664   | -0.410386383   | 7.752386383    | 9.37078751    | -4.8800349     |
| 17:00-18:00 | 0.042     | -0.00506111  | -7.69047619   | 296.108846   | 14.24247262     | 0.566327951 | 1.470663933 | -0.007443192   | -0.006938782   | 3.658462592    | 4.42005748    | -9.82241514    |
| 18:00-19:00 | 0.042     | 0.415233768  | -10.4285714   | 296.334077   | 14.49150368     | 0.56675872  | 1.478540786 | 0.613940061    | 0              | 0              | 0             | -14.4915037    |
| 18:00-20:00 | 0.083     | 0.835347216  | -10.2409639   | 296.289692   | 14.4420868      | 0.566673832 | 1.47698522  | 1.233795491    | 0              | 0              | 0             | -14.4420868    |
| 18:00-21:00 | 0.125     | 1.359446473  | -10.176       | 296.072538   | 14.20273075     | 0.56625851  | 1.469398101 | 1.997568066    | 0              | 0              | 0             | -14.2027307    |
| 18:00-22:00 | 0.167     | 1.650090507  | -9.32335329   | 295.605846   | 13.70166182     | 0.56536593  | 1.453224007 | 2.397951139    | 0              | 0              | 0             | -13.7016618    |
| 18:00-23:00 | 0.208     | 1.869530654  | -8.63461538   | 295.726077   | 13.82903285     | 0.56559588  | 1.457373725 | 2.724604854    | 0              | 0              | 0             | -13.8290328    |
| 18:00-0:00  | 0.25      | 2.10248354   | -8.088        | 295.736462   | 13.84008958     | 0.565615741 | 1.457737202 | 3.064859011    | 0              | 0              | 0             | -13.8400896    |
| 18:00-1:00  | 0.292     | 2.391399099  | -7.79452055   | 295.655231   | 13.7538367      | 0.565460382 | 1.454927066 | 3.479311274    | 0              | 0              | 0             | -13.7538367    |
| 18:00-2:00  | 0.333     | 2.67897867   | -7.63063063   | 295.330846   | 13.41472307     | 0.564839974 | 1.443776856 | 3.8678474      | 0              | 0              | 0             | -13.4147231    |
| 18:00-3:00  | 0.375     | 2.949932512  | -7.38133333   | 295.222615   | 13.3034485      | 0.564632976 | 1.440075638 | 4.248125943    | 0              | 0              | 0             | -13.3034485    |
| 18:00-4:00  | 0.417     | 3.167714013  | -7.09832134   | 295.015231   | 13.09280381     | 0.564236339 | 1.433010098 | 4.539366169    | 0              | 0              | 0             | -13.0928038    |
| 18:00-4:50  | 0.451     | 3.308187834  | -6.79822616   | 294.841455   | 12.91886637     | 0.56390398  | 1.427116289 | 4.721168746    | 0              | 0              | 0             | -12.9188664    |
| 4:50-5:50   | 0.042     | 3.108286103  | 4.380952381   | 294.755077   | 12.832703       | 0.563738777 | 1.424195724 | 4.426807777    | 0              | 0              | 0             | -12.832703     |
| 5:50-6:50   | 0.042     | 2.872726561  | 5.714285714   | 294.807154   | 12.8848079      | 0.563838378 | 1.425955812 | 4.096381135    | 0              | 0              | 0             | -12.8848079    |
| 6:50-7:50   | 0.042     | 2.57946115   | 7.047619048   | 294.848615   | 12.92598799     | 0.563917676 | 1.427358677 | 3.681816255    | 3.536441236    | 14.85317781    | 16.5564871    | 3.630499104    |
| 7:50-8:50   | 0.042     | 2.179908109  | 9.619047619   | 294.813692   | 12.89129325     | 0.563850883 | 1.426176951 | 3.108934701    | 2.988654018    | 17.9723936     | 19.9887377    | 7.097444453    |
| 8:50-9:50   | 0.042     | 1.695861892  | 10.97619048   | 294.827769   | 12.90526692     | 0.563877806 | 1.426653168 | 2.419406741    | 3.325026654    | 19.99316382    | 22.2562355    | 9.350968604    |
| 9:50-10:50  | 0.042     | 1.181703931  | 11.61904762   | 294.978385   | 13.05572889     | 0.564165868 | 1.431758391 | 1.691914519    | 1.620116089    | 21.34093153    | 23.9863529    | 10.93062398    |

## T1

| Time period | Day (d-1) | DO deficit | dDO/dt (mg/L) | Average Tem | ER (mgO2/(L·d) | Ea(eV)     | k (d-1)     | Corrected reae | Reaeration ( | GPP (mgO2/(L·c | Corrected GP | NEP (mgO2/(L·c |
|-------------|-----------|------------|---------------|-------------|----------------|------------|-------------|----------------|--------------|----------------|--------------|----------------|
| 9:00-10:00  | 0.042     | -0.0381185 | 4.4047619     | 294.7148    | 10.595118      | 0.56366617 | 2.26865016  | -0.0864775     | -0.083327    | 13.8810889     | 15.341115    | 4.74603485     |
| 10:00-11:00 | 0.042     | -0.4008563 | 7.1190476     | 295.02977   | 10.855086      | 0.5642641  | 2.28566037  | -0.9162214     | -0.876272    | 17.3883195     | 19.608066    | 8.75297955     |
| 11:00-12:00 | 0.042     | -0.8568148 | 8.5238095     | 295.365     | 11.138788      | 0.5649053  | 2.309409497 | -1.9740199     | -1.872997    | 19.7898067     | 22.799418    | 11.6606299     |
| 12:00-13:00 | 0.042     | -1.3405994 | 9.047619      | 296.12023   | 11.805397      | 0.5663497  | 2.34554304  | -3.1444335     | -2.93055     | 21.3711693     | 25.838874    | 14.0334774     |
| 13:00-14:00 | 0.042     | -1.6141368 | 5.2857143     | 296.63746   | 12.284808      | 0.567339   | 2.374499282 | -3.8327563     | -3.528503    | 18.2072174     | 22.753372    | 10.4685634     |
| 14:00-15:00 | 0.042     | -1.7958147 | 3.5238095     | 296.80346   | 12.44276       | 0.5676564  | 2.38385949  | -4.2809699     | -3.925651    | 16.8424604     | 21.272347    | 8.82958726     |
| 15:00-16:00 | 0.042     | -1.7818147 | -0.3333333    | 296.87854   | 12.514862      | 0.5678     | 2.38810788  | -4.2551657     | -3.895047    | 12.9547136     | 16.44075     | 3.9258874      |
| 16:00-17:00 | 0.042     | -1.515724  | -5.952381     | 296.91685   | 12.551813      | 0.5678733  | 2.39027853  | -3.6230025     | -3.313373    | 6.75399171     | 8.5924625    | -3.9593507     |
| 17:00-18:00 | 0.042     | -1.0983336 | -8.0952381    | 296.49069   | 12.146826      | 0.5670583  | 2.36624192  | -2.5989231     | -2.400957    | 3.69871926     | 4.579095     | -7.5677309     |
| 18:00-19:00 | 0.042     | -0.613116  | -10.571429    | 296.188     | 11.86713       | 0.5664793  | 2.34931594  | -1.4404031     | 0            | 0              | 0            | -11.86713      |
| 18:00-20:00 | 0.083     | -0.1660818 | -10.180723    | 295.91154   | 11.617303      | 0.5659506  | 2.33396255  | -0.3876287     | 0            | 0              | 0            | -11.617303     |
| 18:00-21:00 | 0.125     | 0.2165627  | -9.496        | 295.68692   | 11.418205      | 0.565521   | 2.32156237  | 0.50276384     | 0            | 0              | 0            | -11.418205     |
| 18:00-22:00 | 0.167     | 0.4634758  | -8.4071856    | 295.46308   | 11.223183      | 0.5650929  | 2.30927019  | 1.07029075     | 0            | 0              | 0            | -11.223183     |
| 18:00-23:00 | 0.208     | 0.674888   | -7.6298077    | 295.30885   | 11.090754      | 0.5647979  | 2.30083873  | 1.55280842     | 0            | 0              | 0            | -11.090754     |
| 18:00-0:00  | 0.25      | 0.8531437  | -7.032        | 295.18446   | 10.985091      | 0.56456    | 2.29406132  | 1.95716397     | 0            | 0              | 0            | -10.985091     |
| 18:00-1:00  | 0.292     | 1.0581634  | -6.6438356    | 295.077     | 10.894615      | 0.5643545  | 2.28822209  | 2.42131277     | 0            | 0              | 0            | -10.8          |

| Time period | Day (d-1) | DO deficit   | dDO/dt (mg/L/L-d) | Average Temp (K) | ER (mgO2/(L-d)) | Ea(eV)      | k (d-1)     | Corrected reaar | Reaeration (mgO | GPP (mgO2/(L-d | Corrected GPP | NEP (mgO2/(L-d |
|-------------|-----------|--------------|-------------------|------------------|-----------------|-------------|-------------|-----------------|-----------------|----------------|---------------|----------------|
| 11:00-12:00 | 0.042     | -0.874631181 | 5.833333333       | 296.1759231      | 11.07352377     | 0.56645624  | 0.682245377 | -0.596713081    | -0.5553908      | 15.16172413    | 18.39669282   | 7.323169041    |
| 12:00-13:00 | 0.042     | -1.263019204 | 7.785714286       | 296.5327692      | 11.38185323     | 0.567138733 | 0.688043825 | -0.869012564    | -0.802017194    | 17.36073148    | 21.55084175   | 10.16898852    |
| 13:00-14:00 | 0.042     | -1.660319591 | 9.071428571       | 296.814          | 11.63088521     | 0.567676605 | 0.69264829  | -1.150017525    | -1.05430294     | 18.89873151    | 23.88553939   | 12.25465419    |
| 14:00-15:00 | 0.042     | -1.911459739 | 6.333333333       | 296.8112308      | 11.62840666     | 0.567671309 | 0.692602801 | -1.323882369    | -1.213776934    | 16.32011027    | 20.62284704   | 8.994440376    |
| 15:00-16:00 | 0.042     | -1.940644728 | 1.214285714       | 296.6766923      | 11.50862478     | 0.567413995 | 0.690396376 | -1.339814087    | -1.232309402    | 11.21959512    | 14.0562122    | 2.547587427    |
| 16:00-17:00 | 0.042     | -1.681090483 | -5.238095238      | 296.4788462      | 11.33471668     | 0.567035601 | 0.68716447  | -1.155185651    | -1.067492456    | 4.602397218    | 5.693555555   | -5.64116113    |
| 17:00-18:00 | 0.042     | -1.27738582  | -8.428571429      | 296.1737692      | 11.07168835     | 0.566451211 | 0.682210528 | -0.871446055    | -0.811139996    | 1.155568567    | 1.401932492   | -9.669755862   |
| 18:00-19:00 | 0.042     | -0.836972565 | -9.785714286      | 295.9276923      | 10.86398201     | 0.565981482 | 0.678240682 | -0.567668843    | 0               | 0              | 0             | -10.86398201   |
| 18:00-20:00 | 0.083     | -0.503371266 | -9.072289157      | 295.8706923      | 10.8164285      | 0.565872466 | 0.677324427 | -0.340945654    | 0               | 0              | 0             | -10.8164285    |
| 18:00-21:00 | 0.125     | -0.198819721 | -8.728            | 296.004          | 10.92797084     | 0.566127426 | 0.679469241 | -0.135091885    | 0               | 0              | 0             | -10.92797084   |
| 18:00-22:00 | 0.167     | 0.08185457   | -8.263473054      | 296.1493846      | 11.05092998     | 0.566405484 | 0.681816107 | 0.055809764     | 0               | 0              | 0             | -11.05092998   |
| 18:00-23:00 | 0.208     | 0.464520513  | -8.394230769      | 296.1266154      | 11.03158191     | 0.566361936 | 0.681448021 | 0.316546585     | 0               | 0              | 0             | -11.03158191   |
| 18:00-0:00  | 0.25      | 0.794453282  | -8.248            | 296.0198462      | 10.94130603     | 0.566157733 | 0.679724644 | 0.540009475     | 0               | 0              | 0             | -10.94130603   |
| 18:00-1:00  | 0.292     | 1.105226236  | -8.068493151      | 295.9276154      | 10.8639177      | 0.565981335 | 0.678239444 | 0.749608028     | 0               | 0              | 0             | -10.8639177    |
| 18:00-2:00  | 0.333     | 1.414570447  | -7.957957958      | 295.8269231      | 10.78005438     | 0.565788755 | 0.676621692 | 0.95712905      | 0               | 0              | 0             | -10.78005438   |
| 18:00-3:00  | 0.375     | 1.703380603  | -7.829333333      | 295.7764615      | 10.73827045     | 0.565692244 | 0.675812414 | 1.151165758     | 0               | 0              | 0             | -10.73827045   |
| 18:00-4:00  | 0.417     | 1.937192401  | -7.594724221      | 295.7654615      | 10.72918358     | 0.565671205 | 0.67563613  | 1.308837177     | 0               | 0              | 0             | -10.72918358   |
| 4:00-5:00   | 0.042     | 1.747570447  | 4.380952381       | 295.7746154      | 10.73674484     | 0.565688713 | 0.675782825 | 1.180978094     | 0               | 0              | 0             | -10.73674484   |
| 5:00-6:00   | 0.042     | 1.486248588  | 6.19047619        | 295.7962308      | 10.75462074     | 0.565730053 | 0.676129348 | 1.00489629      | 0               | 0              | 0             | -10.75462074   |
| 6:00-7:00   | 0.042     | 1.199248588  | 6.833333333       | 295.7915385      | 10.75073768     | 0.565721079 | 0.676054109 | 0.810756936     | 0.761522854     | 14.84841048    | 17.57504239   | 6.824304714    |
| 7:00-8:00   | 0.042     | 0.893743909  | 6.904761905       | 295.8276154      | 10.78062877     | 0.565790079 | 0.676632802 | 0.604736445     | 0.567527382     | 15.11023452    | 17.9305794    | 7.14995063     |
| 8:00-9:00   | 0.042     | 0.548958741  | 7.380952381       | 295.9856923      | 10.9125844      | 0.566092411 | 0.679174283 | 0.37283866      | 0.348588801     | 15.80536358    | 18.94590618   | 8.03321783     |
| 9:00-10:00  | 0.042     | 0.015250854  | 8.380952381       | 296.5704615      | 11.41491809     | 0.567210822 | 0.688659164 | 0.01050264      | 0.009684292     | 17.14426809    | 21.33346503   | 9.918546941    |
| 10:00-11:00 | 0.042     | -0.35144783  | 7.80952381        | 297.3496154      | 12.12034682     | 0.568701005 | 0.701503079 | -0.246541735    | -0.223169372    | 16.80569318    | 21.97991529   | 9.859568471    |

## W1

| Time period | Day (d-1) | DO deficit  | dDO/dt (mg/(L | Average Temp (K | ER (mgO2/(L-d)) | Ea(eV)      | k (d-1)     | Corrected reaar | Reaeration (mg | GPP (mgO2/(L-c | Corrected GPP | NEP (mgO2/(L-c |
|-------------|-----------|-------------|---------------|-----------------|-----------------|-------------|-------------|-----------------|----------------|----------------|---------------|----------------|
| 12:00-13:00 | 0.042     | 0.605950997 | 3.38095238    | 291.7848889     | 8.573272824     | 0.558058094 | 1.219859913 | 0.739175331     | 0.763498256    | 12.14045412    | 11.1261078    | 2.55283498     |
| 13:00-14:00 | 0.042     | 0.287301057 | 6.33333333    | 292.024         | 8.732500831     | 0.55851541  | 1.22677925  | 0.352460146     | 0.361999331    | 15.494334      | 14.4184409    | 5.68594005     |
| 14:00-15:00 | 0.042     | -0.06196085 | 7.11904762    | 292.3225385     | 8.935459942     | 0.559086385 | 1.23551416  | -0.07655351     | -0.07807067    | 16.72011829    | 15.8588367    | 6.92337673     |
| 15:00-16:00 | 0.042     | -0.33148941 | 7.04761905    | 292.3812308     | 8.975912898     | 0.559198638 | 1.237235166 | -0.41013035     | -0.41767665    | 16.9882957     | 16.1737575    | 7.19784459     |
| 16:00-17:00 | 0.042     | -0.14955927 | -3.5952381    | 292.2306923     | 8.875251672     | 0.558910723 | 1.232825803 | -0.18438052     | -0.18844467    | 16.18260579    | 5.7671963     | 3.10532537     |
| 17:00-18:00 | 0.042     | 0.121727665 | -5.45238095   | 292.0244615     | 8.732811019     | 0.558516293 | 1.226810679 | 0.149336799     | 0.153376857    | 3.91724219     | 3.64534488    | -5.08746614    |
| 18:00-19:00 | 0.042     | 0.600453271 | -8.61904762   | 291.6250769     | 8.468473411     | 0.557752443 | 1.21524517  | 0.729697937     | 0              | 0              | 0             | -8.46847341    |
| 18:00-20:00 | 0.083     | 1.00900945  | -8.38554217   | 291.0723846     | 8.115813822     | 0.556695382 | 1.199419753 | 1.210225865     | 0.361999331    | 15.494334      | 14.4184409    | -8.11581382    |
| 18:00-21:00 | 0.125     | 1.303840802 | -7.592        | 290.7987692     | 7.946700072     | 0.556172074 | 1.191661669 | 1.553737107     | 0              | 0              | 0             | -7.94670007    |
| 18:00-22:00 | 0.167     | 1.624048098 | -7.43712575   | 290.6442308     | 7.852746289     | 0.555876509 | 1.187302086 | 1.928235694     | 0              | 0              | 0             | -7.85274629    |
| 18:00-23:00 | 0.208     | 1.920393012 | -7.27403846   | 290.5001538     | 7.766153575     | 0.555600953 | 1.183251993 | 2.272308859     | 0              | 0              | 0             | -7.76615357    |
| 18:00-0:00  | 0.25      | 2.212642843 | -7.132        | 290.35          | 7.676924491     | 0.555313773 | 1.179045775 | 2.608807196     | 0              | 0              | 0             | -7.67692449    |
| 18:00-1:00  | 0.292     | 2.414231161 | -6.70205479   | 290.2507692     | 7.61851986      | 0.555123988 | 1.176274261 | 2.839797974     | 0              | 0              | 0             | -7.61851986    |
| 18:00-2:00  | 0.333     | 2.58730916  | -6.32432432   | 290.1207692     | 7.542677095     | 0.554875354 | 1.172653218 | 3.034016411     | 0              | 0              | 0             | -7.54267709    |
| 18:00-3:00  | 0.375     | 2.755776674 | -6.01866667   | 290.0163077     | 7.482281079     | 0.554675564 | 1.169751606 | 3.22357419      | 0              | 0              | 0             | -7.48228108    |
| 18:00-4:00  | 0.417     | 2.942105523 | -5.79376499   | 289.904         | 7.417888038     | 0.554460768 | 1.166640062 | 3.432378169     | 0              | 0              | 0             | -7.41788804    |
| 18:00-5:00  | 0.458     | 2.96431179  | -5.32751092   | 289.7991        | 7.358242934     | 0.55426014  | 1.163741228 | 3.449691843     | 0              | 0              | 0             | -7.35824293    |
| 5:00-6:00   | 0.042     | 2.81964973  | 3.73809524    | 289.6831538     | 7.292874939     | 0.554038385 | 1.160545522 | 3.272331867     | 0              | 0              | 0             | -7.29287494    |
| 6:00-7:00   | 0.042     | 2.595127457 | 4.88095238    | 289.6844615     | 7.293608941     | 0.554040887 | 1.160581515 | 3.011856957     | 3.269860596    | 11.13409178    | 8.92197777    | 1.62836883     |
| 7:00-8:00   | 0.042     | 2.185687121 | 8.21428571    | 289.9084615     | 7.420435516     | 0.554469301 | 1.16763513  | 2.550179985     | 2.753965773    | 14.98331994    | 12.1795714    | 4.75913591     |
| 8:00-9:00   | 0.042     | 1.854494059 | 6.92857143    | 290.161         | 7.566066937     | 0.554952298 | 1.17377262  | 2.17675435      | 2.336662514    | 14.11490891    | 11.6603556    | 4.09428866     |
| 9:00-10:00  | 0.042     | 1.433017886 | 8.85714286    | 290.3899231     | 7.700548281     | 0.555390129 | 1.180162668 | 1.691194211     | 1.805602536    | 16.57454032    | 13.8946097    | 6.19352139     |
| 10:00-11:00 | 0.042     | 0.986399652 | 9.45238095    | 290.6518462     | 7.857350038     | 0.555891074 | 1.187516544 | 1.171365906     | 1.242863562    | 17.73251739    | 15.1157126    | 7.25836259     |
| 11:00-12:00 | 0.042     | 0.522345819 | 9.76190476    | 290.9040769     | 8.011366509     | 0.556373482 | 1.194641603 | 0.624016047     | 0.658155732    | 18.62674903    | 16.1360235    | 8.12465695     |

## W2

| Time period | Day (d-1) | DO deficit  | dDO/dt (mg/(L·d)) | Average Temp (K) | ER (mgO <sub>2</sub> /(L·d)) | Ea(eV)      | k (d-1)     | Corrected reaeration | Reaeration (mgO <sub>2</sub> /(L·d)) | GPP (mgO <sub>2</sub> /(L·d)) | Corrected GPP | NEP (mgO <sub>2</sub> /(L·d)) |
|-------------|-----------|-------------|-------------------|------------------|------------------------------|-------------|-------------|----------------------|--------------------------------------|-------------------------------|---------------|-------------------------------|
| 11:00-12:00 | 0.042     | 0.96856335  | 4.14285714        | 291.3260769      | 8.066389802                  | 0.557180586 | 1.581105119 | 1.531400467          | 1.599098087                          | 11.82575906                   | 10.52451327   | 2.458123467                   |
| 12:00-13:00 | 0.042     | 0.67386671  | 5.5952381         | 291.5340769      | 8.19655479                   | 0.5575784   | 1.588924039 | 1.070723009          | 1.112553932                          | 13.76468416                   | 12.41402864   | 4.217473854                   |
| 13:00-14:00 | 0.042     | 0.37718485  | 5.76190476        | 291.8574615      | 8.403110502                  | 0.558196894 | 1.601157239 | 0.603932253          | 0.622732187                          | 14.42117257                   | 13.27771429   | 4.874603791                   |
| 14:00-15:00 | 0.042     | 0.04986079  | 7                 | 292.1198462      | 8.574522688                  | 0.558698722 | 1.611152069 | 0.080333313          | 0.082320162                          | 16.19967984                   | 15.16743842   | 6.592915729                   |
| 15:00-16:00 | 0.042     | -0.14651615 | 4.5952381         | 292.2131538      | 8.636318439                  | 0.558877179 | 1.614721391 | -0.23658276          | -0.24189816                          | 14.11913626                   | 13.29853801   | 4.662219572                   |
| 16:00-17:00 | 0.042     | 0.04470784  | -4.11904762       | 292.1406154      | 8.58823935                   | 0.558738445 | 1.611945876 | 0.072066617          | 0.073812643                          | 5.089139738                   | 4.77118966    | -3.81704969                   |
| 17:00-18:00 | 0.042     | 0.30997495  | -5.95238095       | 292.0636923      | 8.537546486                  | 0.558591324 | 1.609007806 | 0.498752108          | 0.511768636                          | 2.817850412                   | 2.62884554    | -5.90870095                   |
| 18:00-19:00 | 0.042     | 0.74094851  | -8.61904762       | 291.8588462      | 8.404005997                  | 0.558199542 | 1.601209819 | 1.186414036          | 0                                    | 0                             | 0             | -8.404006                     |
| 18:00-20:00 | 0.083     | 1.05077948  | -7.22891566       | 291.446          | 8.141182394                  | 0.557409947 | 1.585608434 | 1.666124803          | 0                                    | 0                             | 0             | -8.14118239                   |
| 18:00-21:00 | 0.125     | 1.326818    | -6.79166667       | 291.1243077      | 7.942099427                  | 0.556794688 | 1.573557185 | 2.087824             | 0                                    | 0                             | 0             | -7.94209943                   |
| 18:00-22:00 | 0.167     | 1.63892302  | -6.47904192       | 290.8273846      | 7.762668412                  | 0.556226803 | 1.562515145 | 2.560842043          | 0                                    | 0                             | 0             | -7.76266841                   |
| 18:00-23:00 | 0.208     | 1.8736546   | -6.16826923       | 290.6420769      | 7.652747011                  | 0.55587239  | 1.555663185 | 2.914775481          | 0                                    | 0                             | 0             | -7.65274701                   |
| 18:00-0:00  | 0.25      | 2.08499694  | -5.848            | 290.4724615      | 7.553498951                  | 0.555547989 | 1.549417808 | 3.230531389          | 0                                    | 0                             | 0             | -7.55349895                   |
| 18:00-1:00  | 0.292     | 2.2484378   | -5.51369863       | 290.3518462      | 7.483706627                  | 0.555317304 | 1.544991911 | 3.473818219          | 0                                    | 0                             | 0             | -7.48370663                   |
| 18:00-2:00  | 0.333     | 2.40781813  | -5.23123123       | 290.2633077      | 7.432885902                  | 0.555147968 | 1.541751103 | 3.712256254          | 0                                    | 0                             | 0             | -7.4328859                    |
| 18:00-3:00  | 0.375     | 2.59182391  | -5.08533333       | 290.123          | 7.353055707                  | 0.554879621 | 1.536629281 | 3.982672506          | 0                                    | 0                             | 0             | -7.35305571                   |
| 18:00-4:00  | 0.417     | 2.77350445  | -4.9088729        | 290.0046923      | 7.286409394                  | 0.554653349 | 1.532323776 | 4.409906807          | 0                                    | 0                             | 0             | -7.28640939                   |
| 4:00-5:00   | 0.042     | 2.68005134  | 2.80952381        | 289.8528462      | 7.201754292                  | 0.554362933 | 1.5268154   | 2.491943655          | 0                                    | 0                             | 0             | -7.20175429                   |
| 5:00-6:00   | 0.042     | 2.52170875  | 4.35714286        | 289.7179231      | 7.127359488                  | 0.554104884 | 1.521937541 | 3.837883219          | 0                                    | 0                             | 0             | -7.12735949                   |
| 6:00-7:00   | 0.042     | 2.31771521  | 5.02380952        | 289.6389231      | 7.084151163                  | 0.553953791 | 1.5190887   | 3.520814983          | 3.826547809                          | 10.47926171                   | 8.372844121   | 1.288686958                   |
| 7:00-8:00   | 0.042     | 2.02411678  | 5.66666667        | 289.7249231      | 7.131200226                  | 0.554118272 | 1.522190228 | 3.201090778          | 3.341816799                          | 11.60684987                   | 9.324891897   | 1.293691671                   |
| 8:00-9:00   | 0.042     | 1.69150029  | 6.0952381         | 290.0531538      | 7.313635895                  | 0.554746035 | 1.534085949 | 2.594906834          | 2.792666985                          | 12.58457111                   | 10.32472817   | 3.011092279                   |
| 9:00-10:00  | 0.042     | 1.30778553  | 6.42857143        | 290.5704         | 7.516275704                  | 0.555742188 | 1.553153519 | 2.031191694          | 2.159153906                          | 13.55141752                   | 11.49429044   | 3.881533397                   |
| 10:00-11:00 | 0.042     | 0.90142558  | 6.9047619         | 291.1398462      | 7.916207017                  | 0.554822401 | 1.547317177 | 1.418967523          | 1.588253639                          | 14.69850287                   | 12.92638269   | 4.974779972                   |

| Time period | Day (d-1) | DO deficit  | dDO/dt (mg/L) | Average Temp (°C) | ER (mgO2/L-d) | Ea(eV)      | k (d-1)    | Corrected reaeration | Reaeration (m) | GPP (mgO2/L-d) | Corrected GPP | NEP (mgO2/L-d) |
|-------------|-----------|-------------|---------------|-------------------|---------------|-------------|------------|----------------------|----------------|----------------|---------------|----------------|
| 10:00-11:00 | 0.042     | -1.08585211 | 13.11904762   | 302.380385        | 16.8478488    | 0.578322688 | 1.62934183 | -1.76922426          | -1.42138041    | 22.82042803    | 41.1655063    | 24.3176575     |
| 11:00-12:00 | 0.042     | -1.71249609 | 13.0952381    | 302.933231        | 17.580153     | 0.579380043 | 1.65084576 | -2.82706691          | -2.24165738    | 23.61689548    | 44.1344731    | 26.5543202     |
| 12:00-13:00 | 0.042     | -2.15691958 | 14.14285714   | 303.399308        | 18.222195     | 0.580271446 | 1.66919499 | -3.60031935          | -2.82340773    | 25.24626488    | 48.605931     | 30.3837359     |
| 13:00-14:00 | 0.042     | -2.98774729 | 14.30952381   | 303.702462        | 18.652336     | 0.580851248 | 1.68123934 | -5.02311827          | -3.9109612     | 26.50048501    | 52.0188393    | 33.3665032     |
| 14:00-15:00 | 0.042     | -3.58137136 | 13.78571429   | 303.915231        | 18.9602814    | 0.581258183 | 1.68974456 | -6.05160277          | -4.68801511    | 26.7537294     | 53.2349737    | 34.2746924     |
| 15:00-16:00 | 0.042     | -3.87326907 | 7.952380952   | 303.795615        | 18.7865392    | 0.581029411 | 1.68495778 | -6.52629486          | -5.07010922    | 21.30249017    | 42.0651943    | 23.2786551     |
| 16:00-17:00 | 0.042     | -3.64449551 | -4.52380952   | 303.465615        | 18.3154226    | 0.580398264 | 1.67182201 | -6.0929478           | -4.77064462    | 8.526835101    | 16.486198     | -1.8292245     |
| 17:00-18:00 | 0.042     | -3.35784022 | -5.88095238   | 303.160692        | 17.890615     | 0.579815078 | 1.65977548 | -5.57326085          | -4.39541285    | 6.79446047     | 12.8832019    | -5.0074131     |
| 18:00-19:00 | 0.042     | -2.98377742 | -7.71428571   | 302.814308        | 17.4199857    | 0.579152594 | 1.64619621 | -4.91188308          | -3.90576465    | 4.471478932    | 8.29287951    | -9.1271062     |
| 19:00-20:00 | 0.042     | -2.49549001 | -12.2380952   | 302.407077        | 16.8824943    | 0.578373738 | 1.63037361 | -4.0685811           | 0              | 0              | 0             | -16.882494     |
| 19:00-21:00 | 0.083     | -1.82920147 | -10.373494    | 301.926154        | 16.2690561    | 0.577453941 | 1.6118835  | -2.9484597           | 0              | 0              | 0             | -16.269056     |
| 19:00-22:00 | 0.125     | -1.14774029 | -9.216        | 301.446143        | 15.6790082    | 0.576535888 | 1.59363756 | -1.829082            | 0              | 0              | 0             | -15.679008     |
| 19:00-23:00 | 0.167     | -0.47028738 | -8.63473054   | 301.066308        | 15.2273058    | 0.575809428 | 1.57934596 | -0.7427465           | 0              | 0              | 0             | -15.227306     |
| 19:00-0:00  | 0.208     | 0.267215936 | -8.28846154   | 300.714692        | 14.8207698    | 0.57513694  | 1.5662304  | 0.41852172           | 0              | 0              | 0             | -14.82077      |
| 19:00-1:00  | 0.25      | 0.887213491 | -7.256        | 300.483308        | 14.5591835    | 0.574694401 | 1.55765903 | 1.38197611           | 0              | 0              | 0             | -14.559184     |
| 19:00-2:00  | 0.292     | 1.438453793 | -6.06849315   | 300.317923        | 14.3750461    | 0.574378092 | 1.55156132 | 2.23184926           | 0              | 0              | 0             | -14.375046     |
| 19:00-3:00  | 0.333     | 1.904998853 | -5.82582583   | 300.431538        | 14.501292     | 0.574595389 | 1.55574773 | 2.96369765           | 0              | 0              | 0             | -14.501292     |
| 19:00-4:30  | 0.396     | 2.490926699 | -5.25         | 300.739           | 14.8485217    | 0.57518343  | 1.56713358 | 3.90361488           | 0              | 0              | 0             | -14.848522     |
| 4:30-5:00   | 0.021     | 2.353692134 | 5.476190476   | 301.03175         | 15.1868611    | 0.575743334 | 1.57805207 | 3.71424875           | 0              | 0              | 0             | -15.186861     |
| 5:00-6:00   | 0.042     | 2.053838332 | 6.261904762   | 301.228538        | 15.4186174    | 0.576119705 | 1.58543427 | 3.25622568           | 2.68847438     | 11.85343039    | 19.8646858    | 4.44606838     |
| 6:00-7:00   | 0.042     | 1.621006495 | 9.095238095   | 301.547615        | 15.8019317    | 0.576729961 | 1.59747739 | 2.58952123           | 2.1218975      | 15.25334059    | 26.089112     | 10.2871803     |
| 7:00-8:00   | 0.042     | 1.102872736 | 11.04761905   | 301.951615        | 16.3009673    | 0.577502638 | 1.61285711 | 1.77877618           | 1.44366041     | 17.88395864    | 31.3885965    | 15.0876291     |
| 8:00-9:00   | 0.042     | 0.308299519 | 17.21428571   | 302.408615        | 16.8844934    | 0.578376681 | 1.6304331  | 0.50266174           | 0.40356407     | 25.09072164    | 45.3426016    | 28.4581082     |
| 9:00-10:00  | 0.042     | -0.56535159 | 19.11904762   | 302.964231        | 17.6221456    | 0.579439332 | 1.65205993 | -0.9339947           | -0.74004523    | 28.13909285    | 52.6896974    | 35.0675518     |

L2

| Time period | Day (d-1) | DO deficit   | dDO/dt (mg/L-d) | Average Temp (°C) | ER (mgO2/L-d) | Ea(eV)      | k (d-1)     | Corrected reaeration | Reaeration (m) | GPP (mgO2/L-d) | Corrected GPP | NEP (mgO2/L-d) |
|-------------|-----------|--------------|-----------------|-------------------|---------------|-------------|-------------|----------------------|----------------|----------------|---------------|----------------|
| 11:00-12:00 | 0.042     | -1.742752269 | 11.16666667     | 300.8855          | 13.61131727   | 0.575463621 | 3.774691779 | -6.57835266          | -5.47572763    | 24.1473943     | 39.5900573    | 25.97874005    |
| 12:00-13:00 | 0.042     | -2.24456534  | 10.69047619     | 301.1140769       | 13.85287949   | 0.57590079  | 3.79521014  | -8.51859714          | -7.0524243     | 25.2479005     | 42.0035293    | 28.15064981    |
| 13:00-14:00 | 0.042     | -2.64515891  | 8.571428571     | 301.4417692       | 14.20668542   | 0.576527523 | 3.824820375 | -10.1172577          | -8.31108929    | 24.3875179     | 41.4308589    | 27.22417344    |
| 14:00-15:00 | 0.042     | -3.001221233 | 7.761904762     | 301.721           | 14.51528959   | 0.57706157  | 3.850233861 | -11.5554036          | -9.42983712    | 24.6967419     | 42.711681     | 28.19639139    |
| 15:00-16:00 | 0.042     | -2.914525091 | -2.119047619    | 301.8491538       | 14.65916009   | 0.577306673 | 3.861953925 | -11.2557616          | -9.15743784    | 14.5433902     | 25.3588673    | 10.6997072     |
| 16:00-17:00 | 0.042     | -2.717284177 | -4.285714286    | 301.8107692       | 14.61591907   | 0.57723326  | 3.858439796 | -10.4844774          | -8.53770688    | 11.7569926     | 20.450079     | 5.834159882    |
| 17:00-18:00 | 0.042     | -2.476797485 | -5.476190476    | 301.6634615       | 14.45115481   | 0.576951524 | 3.844983367 | -9.52324513          | -7.7820977     | 9.81090722     | 16.9051513    | 2.453996543    |
| 18:00-19:00 | 0.042     | -2.117024219 | -7.738095238    | 301.5298462       | 14.30331244   | 0.576695976 | 3.832818312 | -8.11416919          | -6.6516901     | 6.41859486     | 10.9658189    | -3.33749355    |
| 19:00-20:00 | 0.042     | -1.534065733 | -12.73809524    | 301.185           | 13.9286996    | 0.576036435 | 3.801599241 | -5.83190313          | 0              | 0              | 0             | -13.9286996    |
| 19:00-21:00 | 0.083     | -1.048120566 | -11.8313253     | 300.8725385       | 13.59774629   | 0.575438831 | 3.77531607  | -3.95511608          | 0              | 0              | 0             | -13.5977463    |
| 19:00-22:00 | 0.125     | -0.803883969 | -9.648          | 300.6656923       | 13.38299632   | 0.575043224 | 3.75506523  | -3.01863674          | 0              | 0              | 0             | -13.3829963    |
| 19:00-23:00 | 0.167     | -0.618606804 | -8.173652695    | 300.5428462       | 13.25706479   | 0.574808273 | 3.744140829 | -2.31615099          | 0              | 0              | 0             | -13.2570648    |
| 19:00-0:00  | 0.208     | -0.34201641  | -7.788461538    | 300.3259231       | 13.03758026   | 0.574393393 | 3.724927954 | -1.27398649          | 0              | 0              | 0             | -13.0375803    |
| 19:00-1:00  | 0.25      | 0.005338359  | -7.696          | 300.1286154       | 12.84110008   | 0.574016029 | 3.707538048 | 0.01979217           | 0              | 0              | 0             | -12.8411001    |
| 19:00-2:00  | 0.292     | 0.168078328  | -7.133561644    | 300.0099231       | 12.72433481   | 0.573789022 | 3.697116118 | 0.62140509           | 0              | 0              | 0             | -12.7243348    |
| 19:00-3:00  | 0.333     | 0.314247348  | -6.63963964     | 299.8473077       | 12.56608148   | 0.573478009 | 3.682885013 | 1.15733685           | 0              | 0              | 0             | -12.5660815    |
| 19:00-4:00  | 0.375     | 0.449677413  | -6.296          | 299.8306154       | 12.54994873   | 0.573446084 | 3.681427308 | 1.65545471           | 0              | 0              | 0             | -12.5499487    |
| 19:00-5:30  | 0.438     | 0.60262696   | -5.926940639    | 300.18945         | 12.90136173   | 0.574132379 | 3.712891092 | 2.23748827           | 0              | 0              | 0             | -12.9013617    |
| 5:30-6:00   | 0.021     | 0.524173847  | 2.761904762     | 300.5618333       | 13.27645114   | 0.574884587 | 3.745827232 | 1.96346467           | 1.64695423     | 8.61995053     | 13.8432018    | 0.566750615    |
| 6:00-7:00   | 0.042     | 0.282822646  | 4.404761905     | 300.8355385       | 13.55908099   | 0.575368066 | 3.770221742 | 1.06630409           | 0.88862875     | 11.0211332     | 18.0117252    | 4.452644254    |
| 7:00-8:00   | 0.042     | -0.031061951 | 6.380952381     | 301.217           | 13.96304482   | 0.576097367 | 3.80448548  | -0.11817474          | -0.09759665    | 13.983549      | 23.41719      | 9.454145181    |
| 8:00-9:00   | 0.042     | -0.453018234 | 9.380952381     | 301.4530769       | 14.21905419   | 0.57654915  | 3.825846205 | -1.73317811          | -1.42338329    | 18.3093357     | 31.1273961    | 16.90834194    |
| 9:00-10:00  | 0.042     | -1.014672014 | 11.88095238     | 301.7891538       | 14.59162508   | 0.577191919 | 3.856462325 | -3.91304437          | -3.18809947    | 22.5740518     | 39.2110326    | 24.61940756    |
| 10:00-11:00 | 0.042     | -1.623255043 | 13.19047619     | 302.217           | 15.08008841   | 0.578010204 | 3.895793131 | -6.32386585          | -5.10026735    | 25.7957435     | 46.0492568    | 30.9691684     |

T1

| Time period | Day (d-1) | DO deficit  | dDO/dt (mg/L) | Average Temp (°C) | ER (mgO2/L/d) | Ea(eV)      | k (d-1)      | Corrected reaeration | Reaeration (m) | GPP (mgO2/L/d) | Corrected GPP | NEP (mgO2/L/d) |
|-------------|-----------|-------------|---------------|-------------------|---------------|-------------|--------------|----------------------|----------------|----------------|---------------|----------------|
| 9:00-10:00  | 0.042     | -1.57869378 | 10.14285714   | 300.9546923       | 12.25268872   | 0.575595956 | 2.6184465664 | -4.13375546          | -3.43523767    | 20.29809481    | 33.42656262   | 21.1738739     |
| 10:00-11:00 | 0.042     | -2.12560841 | 11.54761905   | 301.3706154       | 12.6512405    | 0.576391436 | 2.644422679  | -5.62100709          | -4.62532391    | 22.89294295    | 38.71532684   | 26.06408634    |
| 11:00-12:00 | 0.042     | -2.67832249 | 11.97619048   | 301.7483077       | 13.02437845   | 0.577113798 | 2.668216635  | -7.14634462          | -5.82802974    | 24.52422021    | 42.48740376   | 29.46302531    |
| 12:00-13:00 | 0.042     | -3.25245548 | 11.5          | 302.2525385       | 13.53973901   | 0.578078173 | 2.700316328  | -8.78265864          | -7.07734313    | 25.29734313    | 45.26222871   | 31.7224897     |
| 13:00-14:00 | 0.042     | -3.69675576 | 8.738095238   | 302.9483846       | 14.28460003   | 0.579409026 | 2.745249542  | -10.1485171          | -8.04414053    | 23.50223577    | 43.96275963   | 29.6781596     |
| 14:00-15:00 | 0.042     | -3.77749609 | 1.928571429   | 303.2652308       | 14.63720896   | 0.580015015 | 2.765956396  | -10.4483895          | -8.21983149    | 16.86840292    | 32.19915666   | 17.56194769    |
| 15:00-16:00 | 0.042     | -3.48277688 | -5.38095238   | 302.9364615       | 14.27149832   | 0.579386222 | 2.744473366  | -9.55838839          | -7.5785225     | 8.917570114    | 16.66830155   | 2.396803234    |
| 16:00-17:00 | 0.042     | -3.04645743 | -8.47619048   | 302.4013846       | 13.6957333    | 0.578362852 | 2.709865597  | -8.25549019          | -6.62909137    | 4.872900896    | 8.801975499   | -4.8937578     |
| 17:00-18:00 | 0.042     | -2.49432512 | -10.5952381   | 301.7116923       | 12.98772796   | 0.577043769 | 2.665900589  | -6.64962282          | -5.42765147    | 1.552413374    | 2.683218388   | -10.3045096    |
| 18:00-19:00 | 0.042     | -1.95079944 | -11.66666667  | 301.0885385       | 12.37955522   | 0.575851946 | 2.626790839  | -5.1243421           | -4.24493958    | -0.70172709    | -1.165520396  | -13.5450756    |
| 19:00-20:00 | 0.042     | -1.45431869 | -10.547619    | 300.7195385       | 12.03293791   | 0.575146208 | 2.603903042  | -3.78690485          | 0              | 0              | 0             | -12.0329379    |
| 19:00-21:00 | 0.083     | -1.07404006 | -9.3253012    | 300.3450769       | 11.69111049   | 0.574430026 | 2.580880352  | -2.7719689           | 0              | 0              | 0             | -11.6911105    |
| 19:00-22:00 | 0.125     | -0.93349698 | -8.144        | 300.1173077       | 11.4879586    | 0.573994402 | 2.566976295  | -2.39626461          | 0              | 0              | 0             | -11.4879586    |
| 19:00-23:00 | 0.167     | -0.51360684 | -7.5508982    | 299.8480769       | 11.25237399   | 0.57347948  | 2.550637808  | -1.31002501          | 0              | 0              | 0             | -11.252374     |
| 19:00-0:00  | 0.208     | -0.27673434 | -7.08653846   | 299.5835385       | 11.02560145   | 0.572973532 | 2.534685371  | -0.70143449          | 0              | 0              | 0             | -11.0256014    |
| 19:00-1:00  | 0.25      | -0.07656027 | -6.596        | 299.4110769       | 10.88022752   | 0.57263648  | 2.52439202   | -0.1926408           | 0              | 0              | 0             | -10.8802275    |
| 19:00-2:00  | 0.292     | 0.12746009  | -6.26027397   | 299.24215739      | 10.73969465   | 0.572320612 | 2.514246253  | 0.032046606          | 0              | 0              | 0             | -10.7396946    |
| 19:00-3:00  | 0.333     | 0.32476819  | -6.00600601   | 299.0716154       | 10.59965909   | 0.571994445 | 2.50409772   | 0.81325128           | 0              | 0              | 0             | -10.5996591    |
| 19:00-4:00  | 0.375     | 0.50581544  | -5.74666667   | 298.8949231       | 10.45649604   | 0.57165651  | 2.493626184  | 1.26131464           | 0              | 0              | 0             | -10.456496     |
| 19:00-5:00  | 0.417     | 0.68026221  | -5.52517986   | 298.7265923       | 10.32119182   | 0.571332844 | 2.483637909  | 1.08952502           | 0              | 0              | 0             | -10.3211918    |
| 19:00-6:30  | 0.479     | 0.82145179  | -5.19832985   | 298.7009444       | 10.30155256   | 0.571285512 | 2.482180607  | 2.0389917            | 1.7874791      | -0.26580895    | -0.37900793   | -10.6805605    |
| 6:30-7:00   | 0.021     | 0.69140167  | 3.904761905   | 299.09775         | 10.62100014   | 0.57204443  | 2.505650296  | 1.7324108            | 1.50449004     | 9.120271868    | 13.33830668   | 2.717306536    |
| 7:00-8:00   | 0.042     | 0.38148164  | 5.380952381   | 299.5533846       | 11.00004431   | 0.572915861 | 2.532873352  | 0.96624468           | 0.83010005     | 11.27084833    | 16.97057913   | 5.970534813    |
| 8:00-9:00   | 0.042     | -0.16385565 | 10.92857143   | 300.1363077       | 11.50476927   | 0.574030741 | 2.568133271  | -0.42080314          | -0.35654988    | 18.00512131    | 28.13950312   | 16.347337385   |

| Time period | Day (d-1) | DO deficit  | dDO/dt (mg/L) | Average Temp | ER (mgO2/(L·d)) | Ea(eV)      | k (d-1)     | Corrected reaer | Reaeration (mg | GPP (mgO2/(L·d)) | Corrected GPP | NEP (mgO2/(L·d)) |
|-------------|-----------|-------------|---------------|--------------|-----------------|-------------|-------------|-----------------|----------------|------------------|---------------|------------------|
| 11:00-12:00 | 0.042     | -2.76716925 | 9.42857143    | 300.863538   | 9.172349803     | 0.575421618 | 3.655053682 | -10.11415216    | -8.4232632     | 22.9178346       | 37.52147023   | 28.3491204       |
| 12:00-13:00 | 0.042     | -3.32814043 | 11.9761905    | 301.337692   | 9.513243458     | 0.576328469 | 3.696387763 | -12.30209757    | -10.1308595    | 27.17305         | 45.85702102   | 36.3437776       |
| 13:00-14:00 | 0.042     | -3.90307641 | 12.5714286    | 301.709692   | 9.789539165     | 0.577039944 | 3.729143604 | -14.55513241    | -11.8809646    | 29.5183931       | 51.01358493   | 41.2240458       |
| 14:00-15:00 | 0.042     | -4.22051731 | 7.0952381     | 301.988231   | 10.00165914     | 0.577572667 | 3.753859742 | -15.84323004    | -12.8472547    | 25.0084928       | 43.99588916   | 33.99423         |
| 15:00-16:00 | 0.042     | -4.35033762 | 4.19047619    | 301.873692   | 9.91388197      | 0.577353605 | 3.743676391 | -16.28625625    | -13.2424277    | 22.4989039       | 39.29222968   | 29.3783477       |
| 16:00-17:00 | 0.042     | -4.20913836 | -1.73809524   | 301.423077   | 9.57596358      | 0.576491773 | 3.70388063  | -15.59014605    | -12.8126172    | 16.1405219       | 27.38766859   | 17.811705        |
| 17:00-18:00 | 0.042     | -3.93438514 | -5.30952381   | 300.998308   | 9.267980316     | 0.575679373 | 3.666754866 | -14.42642587    | -11.9762684    | 11.7327446       | 19.37522251   | 10.1072422       |
| 18:00-19:00 | 0.042     | -3.50035196 | -9.30952381   | 300.650846   | 9.023429577     | 0.57501483  | 3.636662835 | -12.72959989    | -10.6550714    | 6.41154757       | 10.35536451   | 1.33193493       |
| 19:00-20:00 | 0.042     | -2.89617024 | -13.5         | 300.357923   | 8.822284199     | 0.574454595 | 3.611486063 | -10.45947847    | 0              | 0                | -8.8222842    |                  |
| 19:00-21:00 | 0.083     | -2.36570631 | -12.8433735   | 300.132385   | 8.670471231     | 0.574023237 | 3.592219838 | -8.498137139    | 0              | 0                | -8.67047123   |                  |
| 19:00-22:00 | 0.125     | -2.02370503 | -10.992       | 299.897077   | 8.514866333     | 0.573573196 | 3.572228638 | -7.22913707     | 0              | 0                | -8.51486633   |                  |
| 19:00-23:00 | 0.167     | -1.59948542 | -10.5329341   | 299.638154   | 8.34687007      | 0.573077988 | 3.550359668 | -5.678748533    | 0              | 0                | -8.34687007   |                  |
| 19:00-0:00  | 0.208     | -1.3747426  | -9.38942308   | 299.392077   | 8.19028168      | 0.57260735  | 3.529699795 | -4.852428684    | 0              | 0                | -8.19028168   |                  |
| 19:00-1:00  | 0.25      | -1.20750668 | -8.392        | 299.237077   | 8.093160555     | 0.572310902 | 3.516748221 | -4.246496964    | 0              | 0                | -8.09316055   |                  |
| 19:00-2:00  | 0.292     | -1.01787671 | -7.69520548   | 299.011538   | 7.953894272     | 0.571879544 | 3.497987394 | -3.560519886    | 0              | 0                | -7.95389427   |                  |
| 19:00-3:00  | 0.333     | -0.80012089 | -7.26726727   | 298.721846   | 7.778524231     | 0.571325488 | 3.474036859 | -2.779649451    | 0              | 0                | -7.77852423   |                  |
| 19:00-4:30  | 0.396     | -0.45809552 | -6.82070707   | 298.38805    | 7.581244234     | 0.570687081 | 3.44664327  | -1.57889183     | 0              | 0                | -7.58124423   |                  |
| 4:30-5:00   | 0.021     | -0.51490492 | 2.52380952    | 298.174667   | 7.457760213     | 0.570278971 | 3.429244864 | -1.765735067    | 0              | 0                | -7.45776021   |                  |
| 5:00-6:00   | 0.042     | -0.75611013 | 4.71428571    | 298.334615   | 7.550131267     | 0.570584884 | 3.442278163 | -2.602741382    | -2.30159923    | 12.0818849       | 16.82848911   | 9.27835784       |
| 6:00-7:00   | 0.042     | -1.14144954 | 7.85714286    | 298.657538   | 7.740121968     | 0.571202496 | 3.468742452 | -3.959394472    | -3.4745724     | 16.3977153       | 23.31616999   | 15.576048        |
| 7:00-8:00   | 0.042     | -1.71274263 | 12.2619048    | 299.066231   | 7.987444179     | 0.571984147 | 3.502527618 | -5.998928374    | -5.21358857    | 22.5414933       | 32.90036472   | 24.9129205       |
| 8:00-9:00   | 0.042     | -2.29703319 | 12.6190476    | 299.403077   | 8.197218274     | 0.572628388 | 3.53062075  | -8.109953038    | -6.99216903    | 24.6772166       | 36.80138047   | 28.6041622       |
| 9:00-10:00  | 0.042     | -2.92818303 | 13.1428571    | 299.870538   | 8.497493083     | 0.573522439 | 3.569980984 | -10.45355772    | -8.91338913    | 27.1222463       | 41.67436746   | 33.1768744       |
| 10:00-11:00 | 0.042     | -3.57313899 | 13.3809524    | 300.440846   | 8.878766701     | 0.574613191 | 3.618595571 | -12.92974493    | -10.8766351    | 29.3235875       | 46.72944362   | 37.8506769       |

W1

| Time period | Day (d-1) | DO deficit  | dDO/dt (mg/L) | Average Temp | ER (mgO2/(L·d)) | Ea(eV)      | k (d-1)    | Corrected reaer | Reaeration (mg | GPP (mgO2/(L·d)) | Corrected GPP | NEP (mgO2/(L·d)) |
|-------------|-----------|-------------|---------------|--------------|-----------------|-------------|------------|-----------------|----------------|------------------|---------------|------------------|
| 11:00-12:00 | 0.042     | -2.1959357  | 9.57142857    | 300.650308   | 11.327779983    | 0.5750138   | 1.88879452 | -4.14767137     | -3.47177439    | 19.403203        | 31.3372587    | 20.0094588       |
| 12:00-13:00 | 0.042     | -2.7074578  | 10.6666667    | 301.091      | 11.71858455     | 0.575856653 | 1.90863914 | -5.16755994     | -4.28049079    | 21.3071575       | 35.3952902    | 23.6767057       |
| 13:00-14:00 | 0.042     | -3.2563379  | 11.3809524    | 301.582462   | 12.17031021     | 0.576796606 | 1.93101594 | -6.28804043     | -5.14827026    | 22.8892226       | 39.2367118    | 27.0664016       |
| 14:00-15:00 | 0.042     | -3.5882951  | 7.02380952    | 301.989      | 12.55710976     | 0.577574138 | 1.94972422 | -6.9961858      | -5.6730945     | 19.056904        | 33.5272767    | 20.970167        |
| 15:00-16:00 | 0.042     | -3.6276401  | 1.76190476    | 302.042385   | 12.60880722     | 0.57767624  | 1.95219432 | -7.08185846     | -5.73529903    | 13.8572038       | 24.4626411    | 11.8538339       |
| 16:00-17:00 | 0.042     | -3.4011541  | -3.47619048   | 301.561538   | 12.1507286      | 0.57675659  | 1.93005796 | -6.56442451     | -5.3772246     | 8.26103412       | 14.1421426    | 1.99141396       |
| 17:00-18:00 | 0.042     | -3.0942105  | -5.47619048   | 301.000615   | 11.63735184     | 0.575683787 | 1.90455215 | -5.89308525     | -4.8919468     | 5.77575632       | 9.53937673    | -2.0979751       |
| 18:00-19:00 | 0.042     | -2.7346114  | -6.66666667   | 300.425692   | 11.13366312     | 0.574584208 | 1.87875948 | -5.13767709     | -4.32342062    | 0.01675395       | 6.39481685    | -4.7388463       |
| 19:00-20:00 | 0.042     | -2.2660584  | -9.52380952   | 299.913538   | 10.70335602     | 0.57360468  | 1.85607714 | -4.20597915     | 0              | 0                | -10.703356    |                  |
| 19:00-21:00 | 0.083     | -1.8416811  | -9.13253012   | 299.448538   | 10.32708913     | 0.572715336 | 1.83572044 | -3.38081156     | 0              | 0                | -10.327089    |                  |
| 19:00-22:00 | 0.125     | -1.4268262  | -8.912        | 299.026462   | 9.99701927      | 0.571908086 | 1.81743618 | -2.59316559     | 0              | 0                | -9.9970193    |                  |
| 19:00-23:00 | 0.167     | -1.0333365  | -8.7005988    | 298.635077   | 9.700385316     | 0.571159536 | 1.80064427 | -1.86067138     | 0              | 0                | -9.7003853    |                  |
| 19:00-0:00  | 0.208     | -0.8446382  | -7.68269231   | 298.314923   | 9.464294411     | 0.570547221 | 1.78702387 | -1.50938858     | 0              | 0                | -9.4642944    |                  |
| 19:00-1:00  | 0.25      | -0.5577519  | -7.376        | 298.042846   | 9.26817892      | 0.570026856 | 1.77552983 | -0.99030508     | 0              | 0                | -9.2681789    |                  |
| 19:00-2:00  | 0.292     | -0.3592931  | -6.8630137    | 297.777923   | 9.081125654     | 0.569520172 | 1.76440905 | -0.63394006     | 0              | 0                | -9.0811257    |                  |
| 19:00-3:00  | 0.333     | -0.1682026  | -6.48948949   | 297.541615   | 8.91746461      | 0.569068218 | 1.75454826 | -0.29511954     | 0              | 0                | -8.9174646    |                  |
| 19:00-4:00  | 0.375     | 0.02976049  | -6.18933333   | 297.314308   | 8.762820543     | 0.568633477 | 1.74511503 | 0.05193547      | 0              | 0                | -8.7628205    |                  |
| 19:00-5:00  | 0.417     | 0.14819284  | -5.88729017   | 297.203583   | 8.688465757     | 0.568421709 | 1.74053837 | 0.25793533      | 0              | 0                | -8.6884658    |                  |
| 5:00-6:00   | 0.042     | -0.159138   | 5.52380952    | 297.465429   | 8.865330792     | 0.568922506 | 1.75138085 | -0.27871131     | -0.25159723    | 12.1354068       | 15.9896358    | 7.12430501       |
| 6:00-7:00   | 0.042     | -0.5379244  | 7.52380952    | 297.908846   | 9.173089395     | 0.569770572 | 1.76989613 | -0.95207036     | -0.85045852    | 14.734268        | 19.9719667    | 10.7988773       |
| 7:00-8:00   | 0.042     | -0.9941982  | 8.69047619    | 298.494462   | 9.595974635     | 0.5708906   | 1.79464929 | -1.78423708     | -1.57182734    | 16.6223035       | 23.390447     | 13.7944724       |
| 8:00-9:00   | 0.042     | -1.6010186  | 12.2619048    | 299.096692   | 10.05119978     | 0.572042407 | 1.82046588 | -2.91459964     | -2.53121033    | 21.1531151       | 30.9341287    | 20.8829289       |
| 9:00-10:00  | 0.042     | -2.27171269 | 13.7619048    | 299.733154   | 10.55579239     | 0.573259682 | 1.84815363 | -4.19850023     | -3.59160016    | 23.7135049       | 36.1181666    | 25.623743        |
| 10:00-11:00 | 0.042     | -3.0164195  | 15.4047619    | 300.402462   | 11.11377542     | 0.574539778 | 1.87772466 | -5.6640052      | -4.76895917    | 26.5337211       | 42.1799654    | 31.06619         |

W2

| Time period | Day (d-1) | DO deficit   | dDO/dt (mg/L) | Average Temp (t ER (mgO2/(L·d)) | Ea(eV)      | k (d-1)     | Corrected reaar | Reaaration (mg | GPP (mgO2/(L· | Corrected GPP | NEP (mgO2/(L· |            |
|-------------|-----------|--------------|---------------|---------------------------------|-------------|-------------|-----------------|----------------|---------------|---------------|---------------|------------|
| 11:00-12:00 | 0.042     | -1.882926761 | 10.11904762   | 300.7986154                     | 8.497894335 | 0.575297448 | 4.322009089     | -8.13802657    | -6.78795097   | 21.62399859   | 35.25658042   | 26.7586861 |
| 12:00-13:00 | 0.042     | -2.50283776  | 12.95238095   | 301.3048462                     | 8.835506691 | 0.576265648 | 4.374212032     | -10.947943     | -9.02273012   | 26.69211108   | 44.95092752   | 36.1154208 |
| 13:00-14:00 | 0.042     | -3.112372167 | 13.26190476   | 301.7740769                     | 9.160410052 | 0.577163084 | 4.423162423     | -13.7665276    | -11.2201017   | 29.19900643   | 50.66970106   | 41.509291  |
| 14:00-15:00 | 0.042     | -3.331820034 | 4.523809524   | 302.0810769                     | 9.379420519 | 0.577750242 | 4.455484879     | -14.8448738    | -12.0112112   | 21.25202075   | 37.60988119   | 28.2304607 |
| 15:00-16:00 | 0.042     | -3.183593056 | -2.61904762   | 302.0616923                     | 9.365438168 | 0.577713167 | 4.453437004     | -14.1779311    | -11.476853    | 13.57480535   | 23.99370298   | 14.6282648 |
| 16:00-17:00 | 0.042     | -2.812930631 | -7.26190476   | 301.6732308                     | 9.089589232 | 0.576970209 | 4.412596096     | -12.4123267    | -10.1406149   | 7.595710164   | 13.09632505   | 4.00673582 |
| 17:00-18:00 | 0.042     | -2.354891724 | -6.88095238   | 301.167                         | 8.742268162 | 0.576002008 | 4.359935068     | -10.267175     | -8.48938466   | 6.325432284   | 10.55892538   | 1.81665722 |
| 18:00-19:00 | 0.042     | -2.454891724 | -7.16666667   | 300.6607692                     | 8.408218531 | 0.575033808 | 4.30790251      | -10.5754342    | -8.84988466   | 6.400217998   | 10.34362401   | 1.93540548 |
| 19:00-20:00 | 0.042     | -1.474999847 | -12.6666667   | 300.1470769                     | 8.082290655 | 0.574051337 | 4.255737752     | -6.27721253    | 0             | 0             | -8.08229065   |            |
| 19:00-21:00 | 0.083     | -1.202306678 | -8.80722892   | 299.6216154                     | 7.761962969 | 0.573046357 | 4.203031326     | -5.05333263    | 0             | 0             | -7.76196297   |            |
| 19:00-22:00 | 0.125     | -0.984425826 | -7.056        | 299.1476154                     | 7.483912589 | 0.5721398   | 4.156046973     | -4.09131997    | 0             | 0             | -7.48391259   |            |
| 19:00-23:00 | 0.167     | -0.770990839 | -6.20359281   | 298.7190769                     | 7.24111328  | 0.571320192 | 4.114021148     | -3.17187262    | 0             | 0             | -7.24111328   |            |
| 19:00-0:00  | 0.208     | -0.567447962 | -5.72115385   | 298.3464615                     | 7.036409983 | 0.57060754  | 4.077825127     | -2.31395356    | 0             | 0             | -7.03640998   |            |
| 19:00-1:00  | 0.25      | -0.377285811 | -5.364        | 298.0716923                     | 6.88917658  | 0.570082026 | 4.051338083     | -1.52851238    | 0             | 0             | -6.88917658   |            |
| 19:00-2:00  | 0.292     | -0.176098598 | -5.14726027   | 297.8162308                     | 6.755054115 | 0.569593438 | 4.026866608     | -0.70912556    | 0             | 0             | -6.75505412   |            |
| 19:00-3:00  | 0.333     | 0.016672634  | -4.96996997   | 297.5563846                     | 6.621308122 | 0.569096465 | 4.002126756     | 0.066725996    | 0             | 0             | -6.62130812   |            |
| 19:00-4:00  | 0.375     | 0.167554862  | -4.79733333   | 297.4325385                     | 6.554898064 | 0.568838953 | 3.990388953     | 0.668609068    | 0             | 0             | -6.55489806   |            |
| 19:00-5:30  | 0.438     | 0.358219145  | -4.5          | 297.2657778                     | 6.474863635 | 0.56854066  | 3.967468195     | 1.423791497    | 0             | 0             | -6.47486364   |            |
| 5:30-6:00   | 0.021     | 0.261422411  | 3.333333333   | 297.3445                        | 6.514210956 | 0.568691222 | 3.982065847     | 1.041001253    | 0.942427791   | 7.107905543   | 9.293284719   | 2.77907376 |
| 6:00-7:00   | 0.042     | -0.019438505 | 5.142857143   | 297.6375385                     | 6.662792137 | 0.569251677 | 4.009837016     | -0.07794524    | -0.07007581   | 9.929932952   | 13.22841587   | 6.56562374 |
| 7:00-8:00   | 0.042     | -0.420861933 | 7.428571429   | 298.1403077                     | 6.925652558 | 0.572013257 | 4.057936628     | -1.70778309    | -1.51720727   | 13.6627787    | 18.79559273   | 11.8694902 |
| 8:00-9:00   | 0.042     | -0.944794661 | 10.33333333   | 298.7396154                     | 7.252568078 | 0.571359473 | 4.11602558      | -3.88879899    | -3.40598475   | 18.45613809   | 26.38135906   | 19.128791  |
| 9:00-10:00  | 0.042     | -1.633009603 | 14.23809524   | 299.349                         | 7.600807551 | 0.575224962 | 4.175944329     | -6.81935719    | -5.88699962   | 24.84209486   | 36.91944993   | 29.3186344 |
| 10:00-11:00 | 0.042     | -2.391139446 | 15.83333333   | 299.9786154                     | 7.978180308 | 0.573729143 | 4.238768629     | -10.1354869    | -8.6200577    | 29.17039104   | 45.13209836   | 37.1539181 |

Table S7. Nighttime slope equation for metabolism study

| Season | Site | Equation                             | Site | Equation                             |
|--------|------|--------------------------------------|------|--------------------------------------|
| Autumn | L1   | $y=2.895x-18.648$<br>( $r^2=0.981$ ) | L2   | $y=1.453x-14.943$<br>( $r^2=0.665$ ) |
|        | T1   | $y=1.139x-14.625$<br>( $r^2=0.936$ ) | T2   | $y=2.500x-11.333$<br>( $r^2=0.972$ ) |
|        | W1   | $y=1.501x-7.284$<br>( $r^2=0.891$ )  | W2   | $y=1.787x-9.655$<br>( $r^2=0.860$ )  |
| Winter | L1   | $y=1.457x-18.697$<br>( $r^2=0.761$ ) | L2   | $y=1.695x-14.859$<br>( $r^2=0.821$ ) |
|        | T1   | $y=1.791x-13.314$<br>( $r^2=0.927$ ) | T2   | $y=1.489x-11.363$<br>( $r^2=0.939$ ) |
|        | W1   | $y=1.701x-14.477$<br>( $r^2=0.694$ ) | W2   | $y=1.840x-16.340$<br>( $r^2=0.854$ ) |
| Spring | L1   | $y=5.002x-25.414$<br>( $r^2=0.951$ ) | L2   | $y=1.371x-11.342$<br>( $r^2=0.949$ ) |
|        | T1   | $y=2.186x-9.393$<br>( $r^2=0.959$ )  | T2   | $y=0.655x-8.773$<br>( $r^2=0.874$ )  |
|        | W1   | $y=1.260x-9.523$<br>( $r^2=0.947$ )  | W2   | $y=1.651x-9.282$<br>( $r^2=0.951$ )  |
| Summer | L1   | $y=1.309x-8.280$<br>( $r^2=0.970$ )  | L2   | $y=3.142x-7.505$<br>( $r^2=0.920$ )  |
|        | T1   | $y=2.176x-6.720$<br>( $r^2=0.954$ )  | T2   | $y=3.044x-5.066$<br>( $r^2=0.969$ )  |
|        | W1   | $y=1.581x-6.360$<br>( $r^2=0.943$ )  | W2   | $y=3.605x-4.717$<br>( $r^2=0.762$ )  |



Table S8a. SEM estimations. SE=standard error; CR=critical ratio.

| Pathway                                     | SE    | CR     | <i>p</i> value | Pathway                                    | SE    | CR     | <i>p</i> value |
|---------------------------------------------|-------|--------|----------------|--------------------------------------------|-------|--------|----------------|
| NO <sub>3</sub> <sup>-</sup> → Bioactivity  | 0.178 | -1.543 | 0.123          | NH <sub>4</sub> <sup>+</sup> → Bioactivity | 0.271 | 4.347  | <0.001         |
| PO <sub>4</sub> <sup>3-</sup> → Bioactivity | 1.107 | 5.554  | <0.001         | DOC → Bioactivity                          | 0.704 | -1.317 | 0.188          |
| Bioactivity → GPP                           | 0.166 | 2.266  | 0.023          | Bioactivity → ER                           | 0.160 | 2.343  | 0.019          |
| GPP → DO                                    | 0.264 | -1.725 | 0.085          | ER → DO                                    | 1.241 | -2.768 | 0.006          |
| Temperature → DO                            | 0.298 | -2.335 | 0.020          | DO → Reaeration                            | 2.689 | -2.461 | 0.014          |
| Temperature → Bioactivity                   | 0.291 | 1.974  | 0.023          |                                            |       |        |                |

Note: The absolute value of CR greater than 1.96 at 95% confidence level is considered as a significant effect.

Table S8b. SEM fitting indexes

| CMIN   | DF    | <i>p</i> | CMIN/DF | CFI    | RMR   |
|--------|-------|----------|---------|--------|-------|
| 73.062 | 22    | 0.052    | 3.321   | 0.917  | 0.038 |
| GFI    | AGFI  | PGFI     | NFI     | RMSEA  |       |
| 0.868  | 0.814 | 0.725    | 0.928   | <0.001 |       |

Note: CMIN=Chi-square; DF=Degree of freedom; CMIN/DF<3, the model fit is good; CFI=Comparative fit index, good model fit with the value >0.9; RMR=Root mean square of residual, good model fit with the value <0.05; GFI=Goodness of fit index, the range is 0-1, with the best fit at 1; AGFI=Adjusted goodness of fit index, the range is 0-1, with the good fit at least 0.9; PGFI=Plain goodness of fit index, the range is 0-1, with the good fit at least 0.5; NFI=Normed fit index, good model fit with the value >0.9; RMSEA=Root mean square error of approximation, good model fit with the value <0.1.



**Table S9** Sediment condition summary. Category refers to the proportion of fine and coarse sediments in the sample; OM% = percentage of organic matter. Composition refers to the proportion of particle size in the fine sediment

| Season         | Site | Category                 | Mean OM% | Composition |             |
|----------------|------|--------------------------|----------|-------------|-------------|
| Autumn<br>2020 | L1   | Fine sediment (45.3 %)   | 2.5      | Sand 2.2 %  | Clay 7.9 %  |
|                |      | Coarse sediment (54.7 %) | 2.1      | Silt 89.9 % |             |
|                | L2   | Fine sediment (76.1 %)   | 22.7     | Sand 1.9 %  | Clay 10.7 % |
|                |      | Coarse sediment (23.9 %) | 15.4     | Silt 87.4 % |             |
|                | T1   | Fine sediment (25.0 %)   | 4.0      | Sand 0.7 %  | Clay 3.4 %  |
|                |      | Coarse sediment (75.0 %) | 3.0      | Silt 95.9 % |             |
|                | T2   | Fine sediment (56.1 %)   | 6.3      | Sand 4.6 %  | Clay 8.6%   |
|                |      | Coarse sediment (43.9 %) | 4.3      | Silt 86.8 % |             |
|                | W1   | Fine sediment (70.3 %)   | 4.3      | Sand 0.5 %  | Clay 6.1%   |
|                |      | Coarse sediment (29.7 %) | 4.1      | Silt 93.4 % |             |
| Winter<br>2020 | L1   | Fine sediment (75.4 %)   | 11.0     | Sand 0.2 %  | Clay 4.8 %  |
|                |      | Coarse sediment (24.6 %) | 7.6      | Silt 95.0 % |             |
|                | L2   | Fine sediment (42.1 %)   | 1.9      | Sand 2.5 %  | Clay 7.2 %  |
|                |      | Coarse sediment (57.9 %) | 1.1      | Silt 90.3 % |             |
|                | T1   | Fine sediment (78.9 %)   | 11.6     | Sand 1.4 %  | Clay 9.3 %  |
|                |      | Coarse sediment (21.1 %) | 9.5      | Silt 89.3 % |             |
|                | T2   | Fine sediment (32.2 %)   | 8.2      | Sand 0.5 %  | Clay 3.1 %  |
|                |      | Coarse sediment (67.8 %) | 5.8      | Silt 96.4 % |             |
|                | W1   | Fine sediment (71.4 %)   | 8.6      | Sand 4.2 %  | Clay 8.2%   |
|                |      | Coarse sediment (28.6 %) | 7.8      | Silt 87.6 % |             |
| Spring<br>2021 | L1   | Fine sediment (76.2 %)   | 3.6      | Sand 0.3 %  | Clay 5.8%   |
|                |      | Coarse sediment (23.8 %) | 3.5      | Silt 93.9 % |             |
|                | L2   | Fine sediment (66.0 %)   | 5.1      | Sand 0.2 %  | Clay 4.6 %  |
|                |      | Coarse sediment (34.0 %) | 4.8      | Silt 95.2 % |             |
|                | T1   | Fine sediment (46.0 %)   | 2.5      | Sand 3.2 %  | Clay 7.9 %  |
|                |      | Coarse sediment (54.0 %) | 1.5      | Silt 88.9 % |             |
|                | T2   | Fine sediment (88.5 %)   | 17.0     | Sand 1.8 %  | Clay 10.1 % |
|                |      | Coarse sediment (11.5 %) | 10.2     | Silt 88.1 % |             |
|                | W1   | Fine sediment (41.4 %)   | 13.3     | Sand 0.8 %  | Clay 3.6 %  |
|                |      | Coarse sediment (58.6 %) | 9.9      | Silt 95.6 % |             |
| Summer<br>2021 | L1   | Fine sediment (52.1 %)   | 14.5     | Sand 4.6 %  | Clay 8.9 %  |
|                |      | Coarse sediment (47.9 %) | 10.7     | Silt 86.5 % |             |
|                | L2   | Fine sediment (82.9 %)   | 4.8      | Sand 0.7 %  | Clay 6.5%   |
|                |      | Coarse sediment (17.1 %) | 4.1      | Silt 92.8 % |             |
|                | T1   | Fine sediment (38.2 %)   | 8.9      | Sand 0.5 %  | Clay 5.5 %  |
|                |      | Coarse sediment (61.8 %) | 6.2      | Silt 94.0 % |             |
|                | T2   | Fine sediment (38.7 %)   | 5.7      | Sand 2.7 %  | Clay 7.5 %  |
|                |      | Coarse sediment (61.3 %) | 3.7      | Silt 89.8 % |             |
|                | W1   | Fine sediment (56.8 %)   | 19.4     | Sand 1.4 %  | Clay 9.5 %  |
|                |      | Coarse sediment (43.2 %) | 15.4     | Silt 89.1 % |             |

**Table S10** The concentration of nutrients with the equilibrium flux at the sediment-water interface (mg/L)

| Season         | Site | NO <sub>3</sub> <sup>-</sup> | NH <sub>4</sub> <sup>+</sup> | PO <sub>4</sub> <sup>3-</sup> | DOC    | Site | NO <sub>3</sub> <sup>-</sup> | NH <sub>4</sub> <sup>+</sup> | PO <sub>4</sub> <sup>3-</sup> | DOC    |
|----------------|------|------------------------------|------------------------------|-------------------------------|--------|------|------------------------------|------------------------------|-------------------------------|--------|
| Autumn<br>2020 | L1   | 23.240                       | 2.022                        | 1.017                         | 11.357 | L2   | 41.416                       | 1.815                        | 1.369                         | 16.417 |
|                | T1   | 38.178                       | 1.664                        | 0.865                         | 12.062 | T2   | 31.866                       | 1.547                        | 1.223                         | 15.131 |
|                | W1   | 17.376                       | 1.354                        | 0.921                         | 15.896 | W2   | 17.991                       | 1.664                        | 0.805                         | 10.496 |
| Winter<br>2020 | L1   | 45.471                       | 3.572                        | 0.933                         | 14.433 | L2   | 26.363                       | 3.937                        | 0.814                         | 12.155 |
|                | T1   | 42.531                       | 3.081                        | 0.793                         | 12.560 | T2   | 32.103                       | 1.700                        | 0.911                         | 12.240 |
|                | W1   | 37.215                       | 2.744                        | 0.825                         | 11.310 | W2   | 27.913                       | 3.734                        | 0.808                         | 10.186 |
| Spring<br>2021 | L1   | 41.036                       | 2.161                        | 1.147                         | 8.934  | L2   | 25.024                       | 2.052                        | 0.867                         | 6.864  |
|                | T1   | 23.234                       | 2.009                        | 0.160                         | 10.244 | T2   | 25.569                       | 2.255                        | 0.292                         | 9.105  |
|                | W1   | 18.489                       | 1.756                        | 0.410                         | 7.603  | W2   | 15.657                       | 1.402                        | 0.453                         | 7.571  |
| Summer<br>2021 | L1   | 20.954                       | 4.779                        | 0.921                         | 9.520  | L2   | 21.308                       | 4.441                        | 0.354                         | 5.754  |
|                | T1   | 16.496                       | 5.995                        | 0.117                         | 11.526 | T2   | 26.008                       | 4.241                        | 0.188                         | 7.540  |
|                | W1   | 19.677                       | 4.445                        | 0.706                         | 6.626  | W2   | 20.843                       | 3.724                        | 0.399                         | 5.838  |

## Supplementary Figures

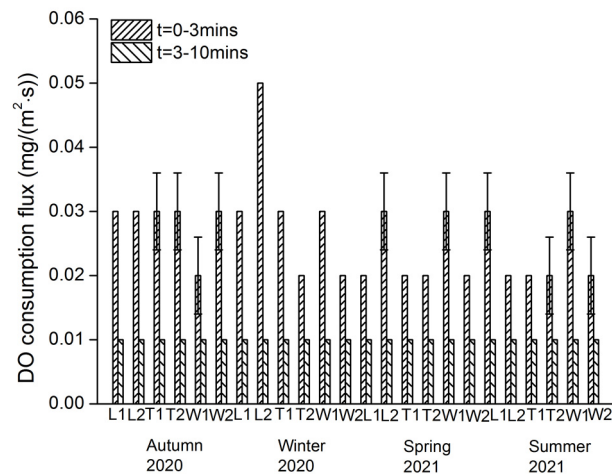

**Figure S1** DO consumption flux during both exposures in nutrient flux experiments. The measurement at each site has three replicates, if the results are different, the error line is marked on the bar. The difference in the DO concentration at the beginning and the end of time during the exposure was used to estimate DO consumption flux.

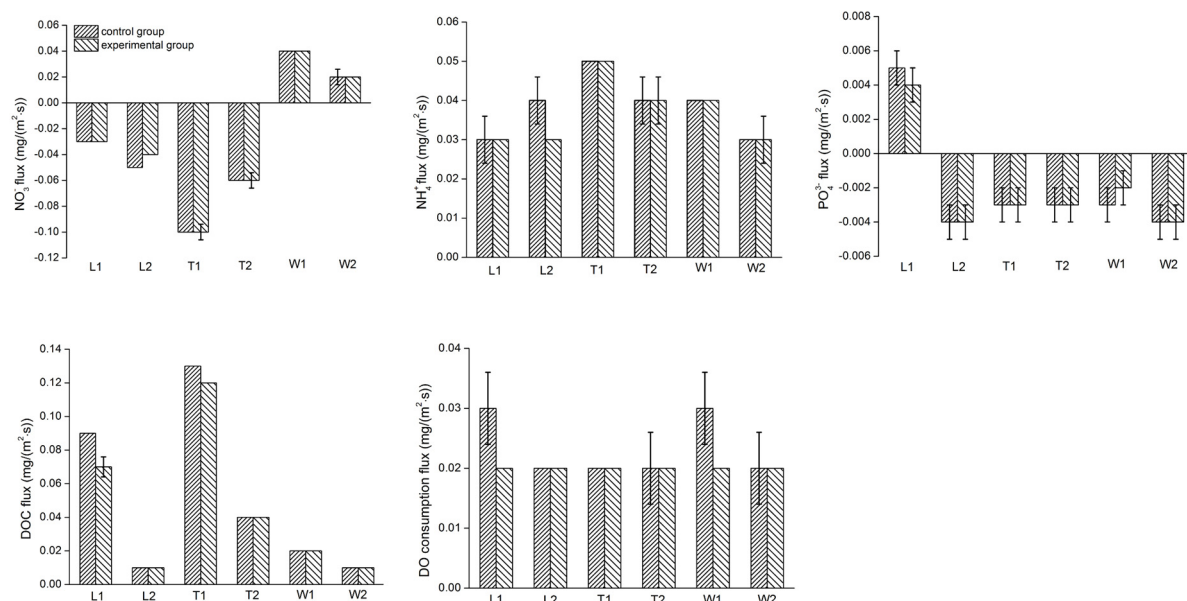

**Figure S2** Nutrient and DO consumption fluxes during the 0-3 min exposure in the summer study (June-August 2021). The experimental group was added with 1mg/L of zinc chloride in the chamber, and the control group was under the original experimental conditions. For nutrients, downwards flux represents uptake/removal of nutrients from overlying water to sediment and upwards flux represents regeneration/release of nutrients from sediment to water. The flux experiment at each site has three replicates, if the results are different, the error line is marked on the bar.

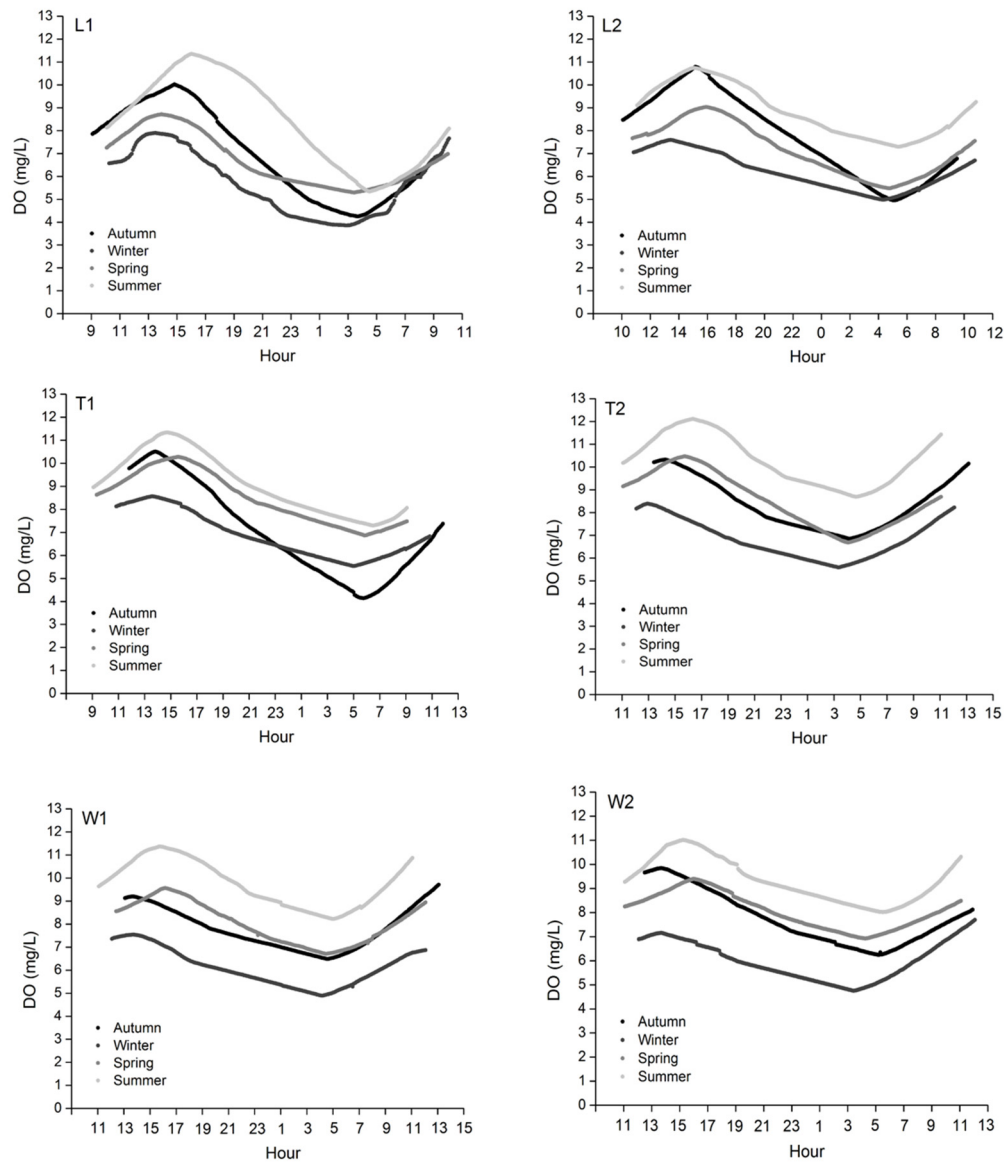

**Figure S3** Diurnal variation of DO concentrations in the four seasons across study sites. There was no significant difference in the DO concentration between autumn and winter at T1, but the significant difference was observed at other sites between each season. The maximum and minimum mean DO concentrations at each site appeared in summer and winter, respectively.

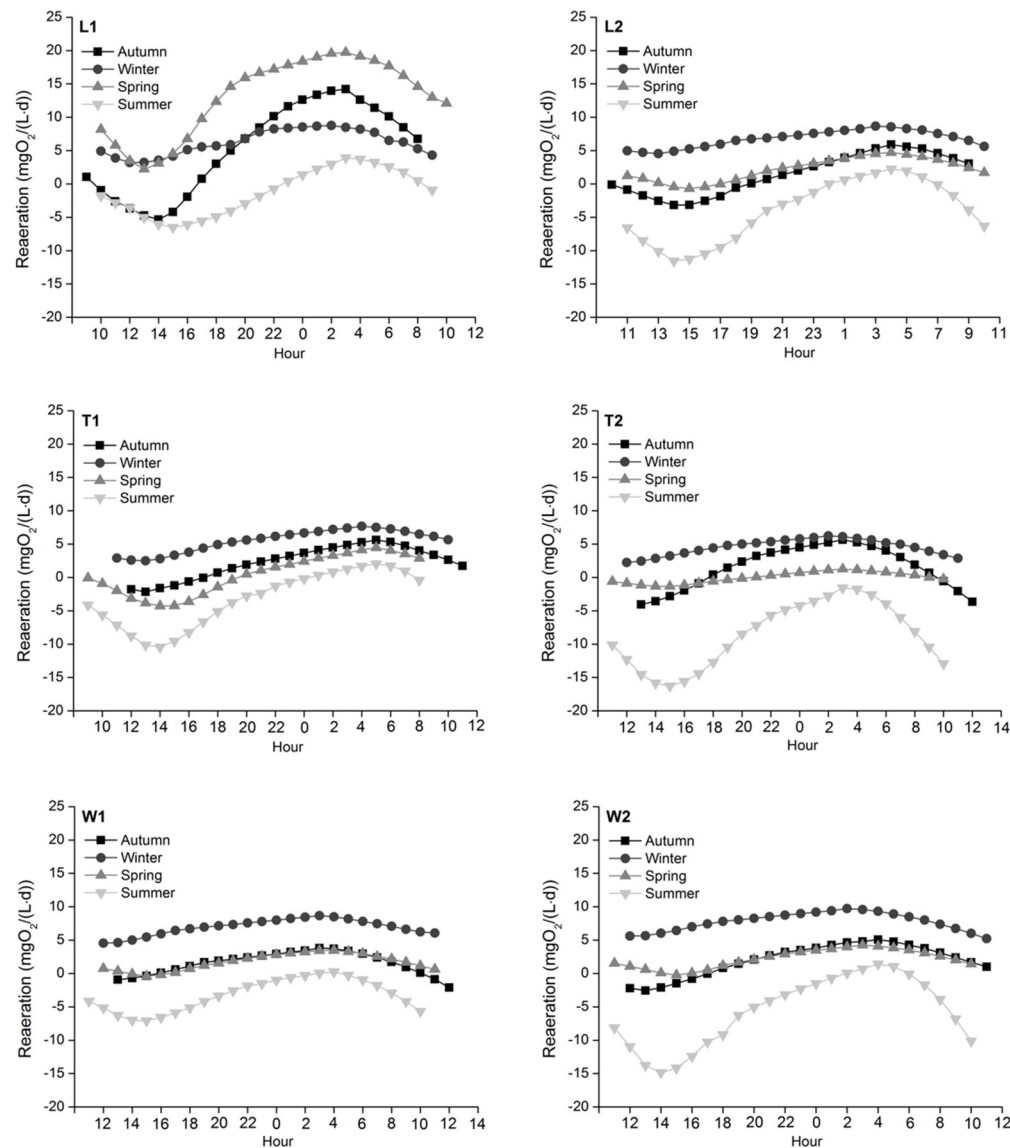

**Figure S4** Diurnal variations of reaeration rate in the four seasons across study sites. In each season, the maximum reaeration rate appeared within one hour before sunrise, and gradually decreased with DO accumulation in the GPP process during the daytime. The reaeration rate was the lowest in summer and the highest in winter except L1.
